# Supplementary material for: Synthesis of N-fused polycyclic indoles via a Pd-catalyzed multicomponent cascade reaction consisting of an amide-directed [3+1+1] annulation reaction of 3-diazo oxindole and isocyanides
Source: Royal Society of Chemistry journal article supplement (doi:10.1039/d3nj04886a), 2024-01-01
Supplement: d3nj04886a1.pdf [file d3nj04886a1.pdf]

*Supporting Information for*

**Synthesis of *N*-fused polycyclic indoles via Pd-catalyzed multicomponent cascade reaction consisting of amide-directed [3+1+1] annulation reaction of 3-diazo oxindole and isocyanides**

Pooja Soam,<sup>a</sup> Debasish Mandal<sup>a</sup> and Vikas Tyagi<sup>a\*</sup>

<sup>a</sup>School of Chemistry and Biochemistry

<sup>b</sup>Centre of Excellence for Emerging Materials

Thapar Institute of Engineering and Technology

Patiala-147004, Punjab, India

Email: [vikas.tyagi@thapar.edu](mailto:vikas.tyagi@thapar.edu)

## Index

Table of Contents

|                                                                                        |         |
|----------------------------------------------------------------------------------------|---------|
| General information.....                                                               | S2      |
| General method for the synthesis of 3-diazo oxindole (1a-1p).....                      | S2      |
| Method for crystallization.....                                                        | S2-S3   |
| X-ray crystal data of compound 3a .....                                                | S3- S4  |
| Optimization of the reaction conditions.....                                           | S4- S5  |
| Copies of H <sup>1</sup> NMR and C <sup>13</sup> NMR data of compounds (3a-3q, 4)..... | S6-S25  |
| Computational details, Optimized Cartesian Coordinates and electronic energies.....    | S26-S71 |
| References.....                                                                        | S72     |

**General Information:** All the reagents and solvents involved in this synthesis were obtained directly from commercial sources and used without any additional purification. The  $^1\text{H}$  NMR and  $^{13}\text{C}\{^1\text{H}\}$  NMR were recorded using JEOL spectrometers at 400 MHz and 100 MHz respectively in  $\text{CDCl}_3$  and  $d_6$ -DMSO using tetramethylsilane (TMS) as an internal reference. The following terms are used in NMR follow-up experiments: b, broad; s, singlet; d, doublet; t, triplet; q, quartet; m, multiplet; td or dd, doublet of triplet and double doublet. The HRMS data were carried out using the Water QTOF mass spectrometer (XEVO G2 XS) in ESI(+ve) mode. Silica gel (GF-254) containing glass plates was used for Thin Layer Chromatography (TLC) for monitoring the progress of the reaction. The column chromatography was performed using silica gel (60-120 mesh) as the stationary phase and ethyl acetate in hexane as the mobile phase. All the compounds were characterized using  $^1\text{H}$  NMR,  $^{13}\text{C}$  NMR & HRMS data.

### General method for the synthesis of 3-diazo oxindoles (1a-1p)<sup>1-3</sup>

A mixture of isatin (1.0 equiv., 1g, 6.80mmol) and *para*-tosyl hydrazones (1.1 equiv., 1.39 gm, 7.48 mmol) were added in methanol as solvent (~ 20 mL) at 60 °C and stirred the resulting mixture for 5 to 6 h, a highly yellow colored solid 3-(2-(*p*-tolyl) hydrazono) indolin-2-one intermediates was filtered. The filtered solid and NaOH (2.0 equiv., 13.6mmol) were dissolved in a mixture of THF and water in a ratio of 1:2 and stirred the mixture at room temperature for 5 h. Upon complete conversion of the starting materials, work-up of the reaction with ethyl acetate and distilled water in a 2:1 ratio was done and the volatiles were removed using a high vacuum. The 3-diazo oxindole (83%, 900 mg) was obtained as an orange-red solid and used for the next step without further purification. (*Substrates 5 and 7 were synthesized using previously reported methods*)<sup>5,6</sup>

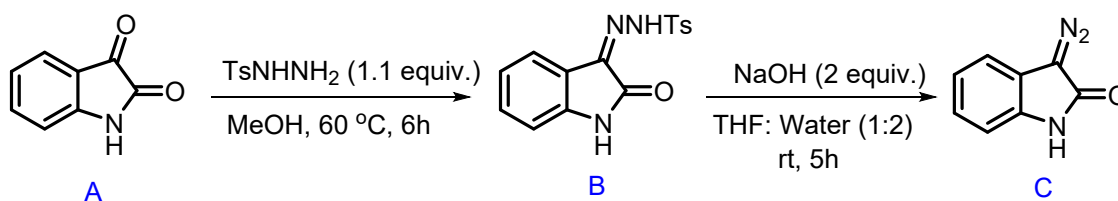

**Scheme S1:** Synthesis of 3-diazo oxindole

### Method for Crystallization

Single crystal growth was done by vapor diffusion method. The experimental set up consists of an inner container made up of glass and having compound 3a (6 mg) dissolved in 0.5 ml of dichloromethane and an outer container filled with hexane (2.5 ml). Next, the outer container

was closed and the two solvents started to equilibrate which resulted in a single crystal formation.<sup>4</sup>

### Crystallographic Data

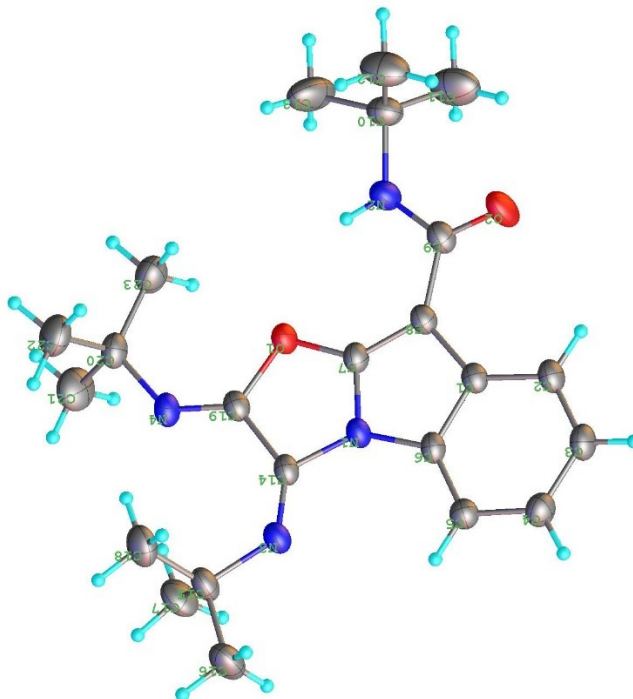

Figure S1: ORTEP diagram for the crystal structure of 3a (Ellipsoid = 50%)

Table S1:

|                       |                                                               |
|-----------------------|---------------------------------------------------------------|
| Identification code   | Ex-Thapar-pooja                                               |
| Empirical formula     | C <sub>23</sub> H <sub>32</sub> N <sub>4</sub> O <sub>2</sub> |
| Formula weight        | 396.52                                                        |
| Temperature/K         | 293(2)                                                        |
| Crystal system        | triclinic                                                     |
| Space group           | P-1                                                           |
| a/Å                   | 9.59358(18)                                                   |
| b/Å                   | 10.5593(2)                                                    |
| c/Å                   | 11.9248(3)                                                    |
| $\alpha$ /°           | 103.8143(19)                                                  |
| $\beta$ /°            | 97.5949(17)                                                   |
| $\gamma$ /°           | 98.8737(17)                                                   |
| Volume/Å <sup>3</sup> | 1140.89(4)                                                    |
| Z                     | 2                                                             |

|                                                |                                                              |
|------------------------------------------------|--------------------------------------------------------------|
| $\rho_{\text{calc}}/\text{cm}^3$               | 1.154                                                        |
| $\mu/\text{mm}^{-1}$                           | 0.075                                                        |
| F(000)                                         | 428.0                                                        |
| Crystal size/ $\text{mm}^3$                    | $0.05 \times 0.04 \times 0.03$                               |
| Radiation                                      | MoK $\alpha$ ( $\lambda = 0.71073$ )                         |
| $2\Theta$ range for data collection/ $^\circ$  | 6.474 to 52.74                                               |
| Index ranges                                   | $-11 \leq h \leq 11, -13 \leq k \leq 12, -14 \leq l \leq 14$ |
| Reflections collected                          | 15515                                                        |
| Independent reflections                        | 4625 [Rint = 0.0351, Rsigma = 0.0350]                        |
| Data/restraints/parameters                     | 4625/0/275                                                   |
| Goodness-of-fit on $F^2$                       | 1.066                                                        |
| Final R indexes [ $I \geq 2\sigma(I)$ ]        | $R_1 = 0.0497, wR_2 = 0.1260$                                |
| Final R indexes [all data]                     | $R_1 = 0.0698, wR_2 = 0.1399$                                |
| Largest diff. peak/hole / $e \text{ \AA}^{-3}$ | 0.16/-0.23                                                   |

**Table S2:** Optimization of the reaction conditions<sup>a</sup>

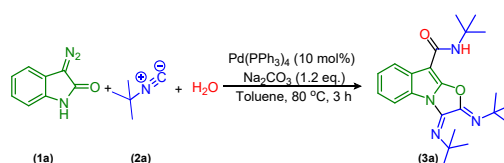

| entry | deviation from standard conditions                                               | yield <sup>b</sup> (%) |
|-------|----------------------------------------------------------------------------------|------------------------|
| 1.    | $\text{PdCl}_2$ instead of $\text{Pd}(\text{PPh}_3)_4$                           | 44                     |
| 2.    | $\text{PdCl}_2(\text{NCC}_6\text{H}_5)_2$ instead of $\text{Pd}(\text{PPh}_3)_4$ | 37                     |
| 3.    | $\text{Pd}(\text{DPPF})\text{Cl}_2$ instead of $\text{Pd}(\text{PPh}_3)_4$       | 41                     |
| 4.    | $\text{Pd}(\text{dba})_3$ instead of $\text{Pd}(\text{PPh}_3)_4$                 | 32                     |
| 5.    | $\text{Pd}(\text{OAc})_2$ (5 mol% instead of 10 mol%).                           | 48                     |
| 6.    | In absence of base                                                               | 27                     |
| 7.    | $\text{CH}_3\text{CN}$ instead of toluene                                        | 53                     |
| 8.    | DMF instead of toluene                                                           | 57                     |
| 9.    | DMSO instead of toluene                                                          | 54                     |
| 10.   | THF instead of toluene                                                           | 50                     |

|     |                                            |    |
|-----|--------------------------------------------|----|
| 11. | Added AgOAc as an additive                 | 58 |
| 12. | Added CsOAc as an additive                 | 63 |
| 13. | <i>tert</i> -butyl isocyanide (1.5 equiv.) | 31 |
| 14. | <i>tert</i> -butyl isocyanide (2.0 equiv.) | 43 |
| 15. | <i>tert</i> -butyl isocyanide (3.5 equiv.) | 62 |
| 16. | <i>tert</i> -butyl isocyanide (4.0 equiv.) | 60 |

<sup>a</sup>Reaction conditions: 3-diazo oxindole 1a (1.0 equiv., 0.31 mmol, 50 mg), *tert*-butyl isocyanide 2a (3.2 equiv., 113  $\mu$ L, 0.99 mmol), H<sub>2</sub>O (1.0 equiv., 5.6  $\mu$ L), Pd-catalyst (10 mol%), base (1.2 equiv.), solvent (2 ml), for 3 h.  
<sup>b</sup>isolated yield.

**Copies of <sup>1</sup>H NMR and <sup>13</sup>C{<sup>1</sup>H} NMR data of compounds (3a-3q, 4)**

**<sup>1</sup>H NMR (400 MHz, CDCl<sub>3</sub>) and <sup>13</sup>C{<sup>1</sup>H} NMR (100 MHz, CDCl<sub>3</sub>) spectra of 3a**

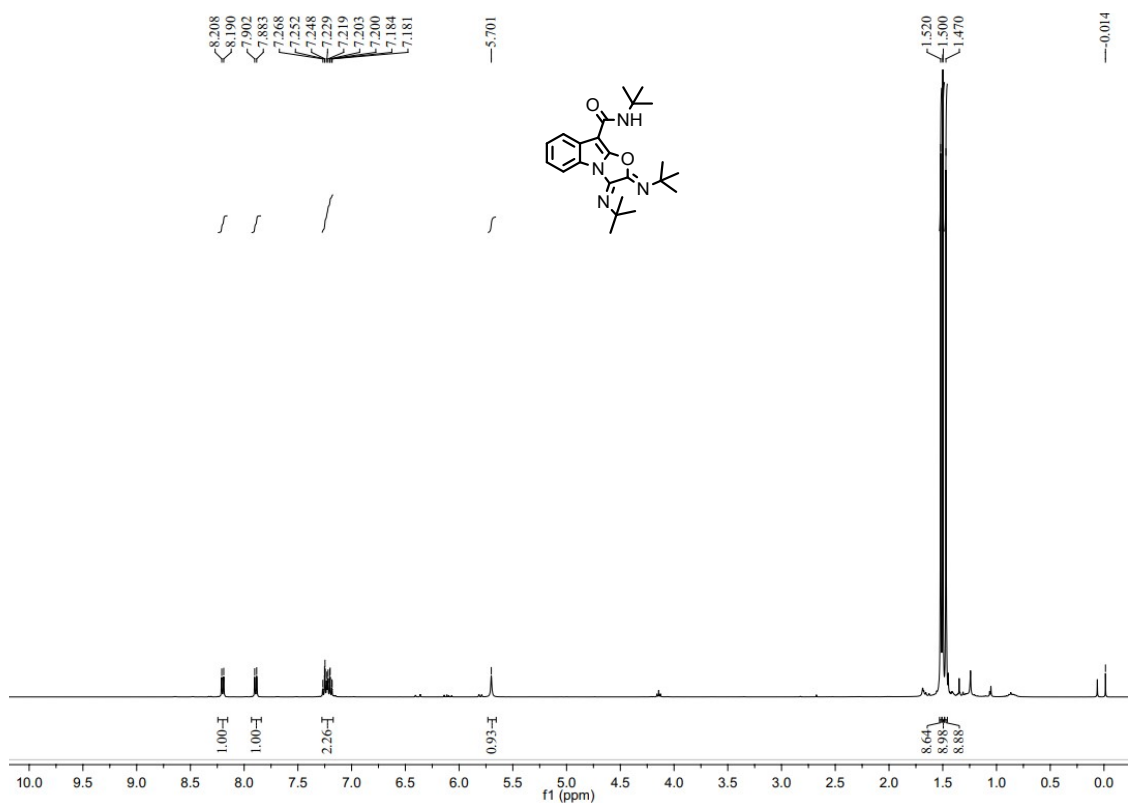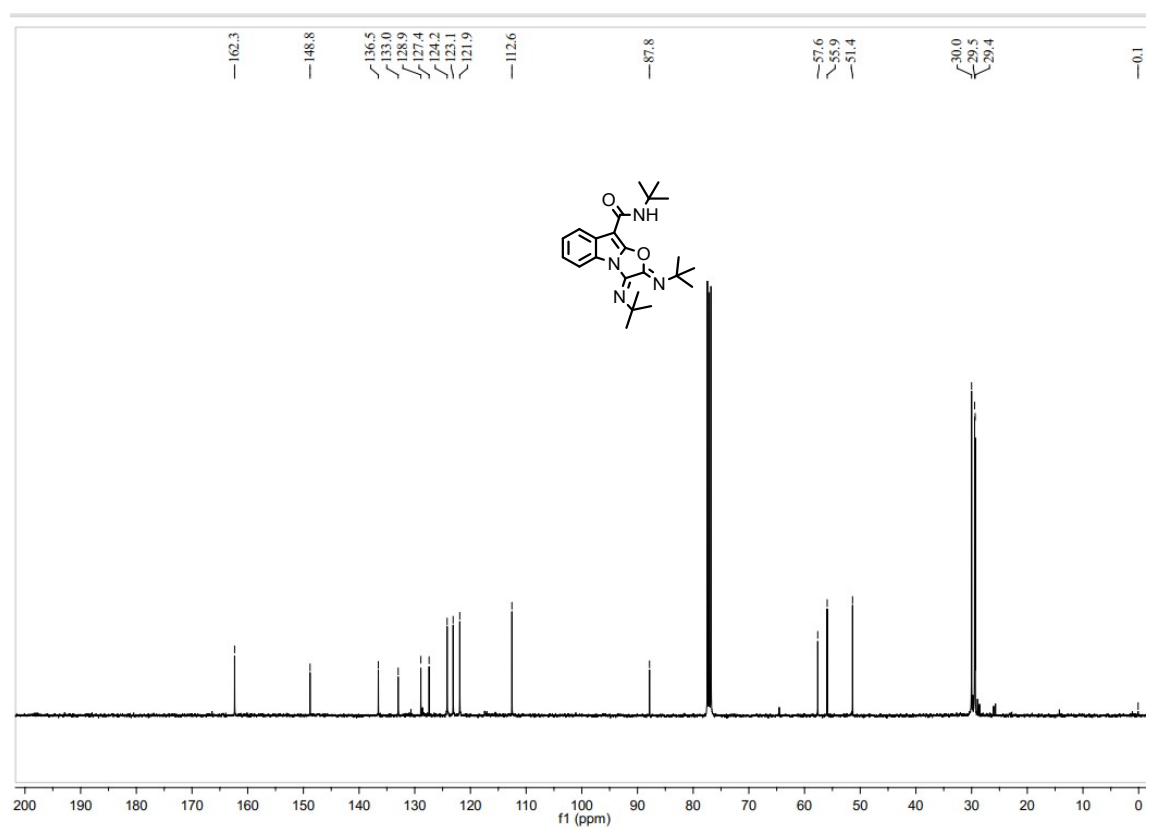

$^1\text{H}$  NMR (400 MHz,  $\text{CDCl}_3$ ) and  $^{13}\text{C}\{^1\text{H}\}$  NMR (100 MHz,  $\text{CDCl}_3$ ) spectra of 3b

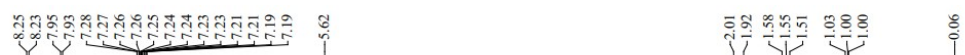

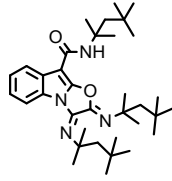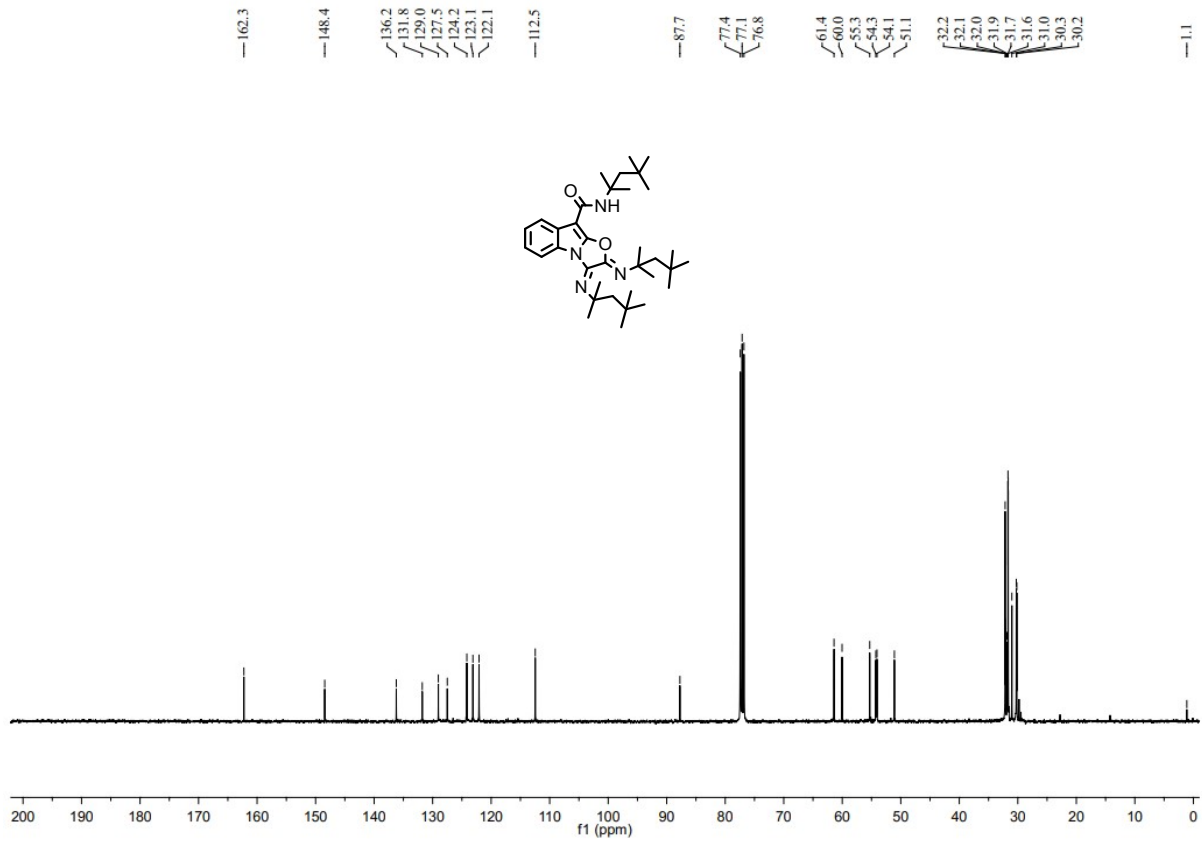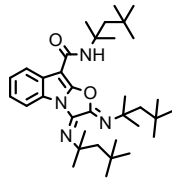

<sup>1</sup>H NMR (400 MHz, CDCl<sub>3</sub>) and <sup>13</sup>C{<sup>1</sup>H} NMR (100 MHz, CDCl<sub>3</sub>) spectra of 3c

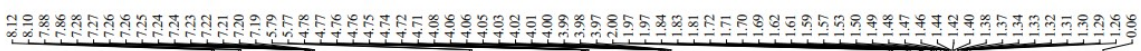

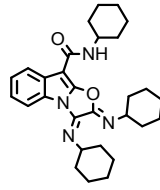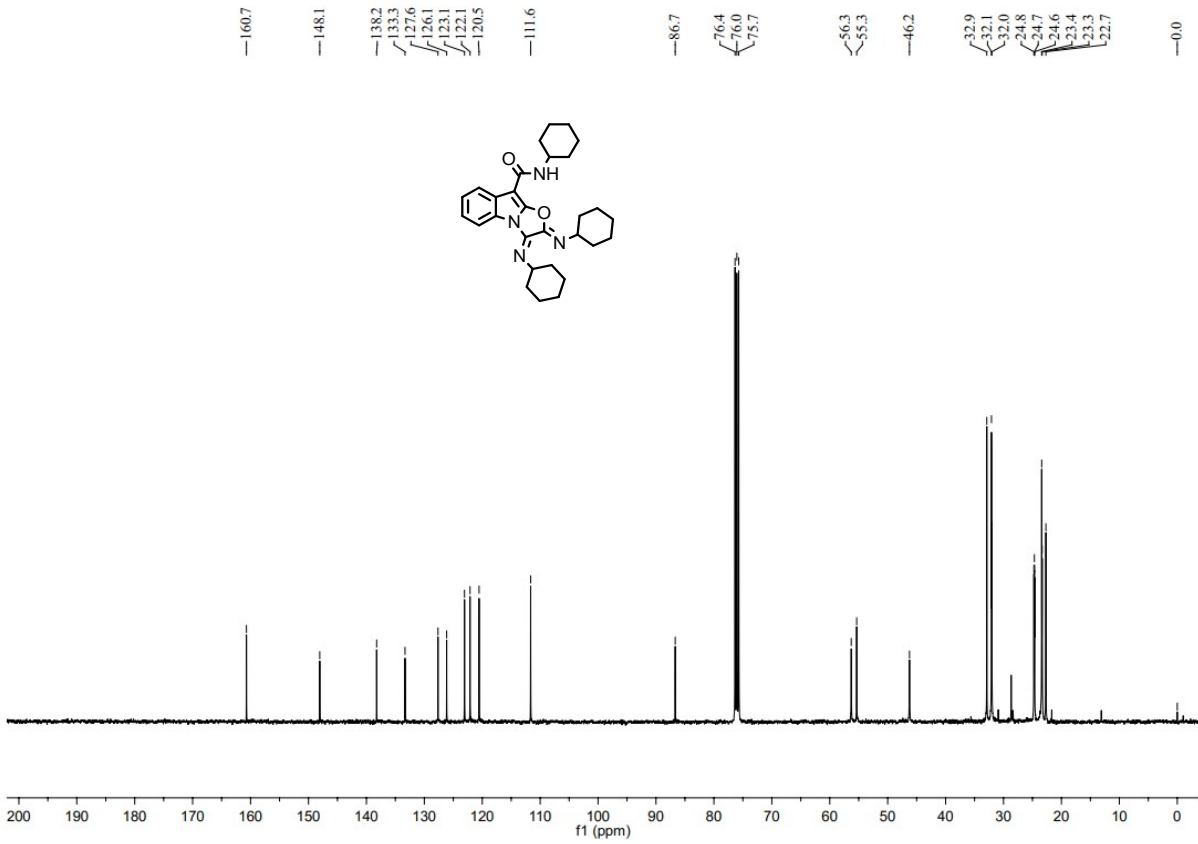

**$^1\text{H}$  NMR (400 MHz,  $\text{CDCl}_3$ ) and  $^{13}\text{C}\{^1\text{H}\}$  NMR (100 MHz,  $\text{CDCl}_3$ ) spectra of 3d**

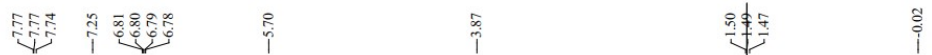



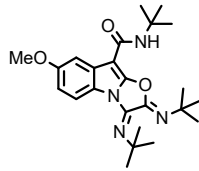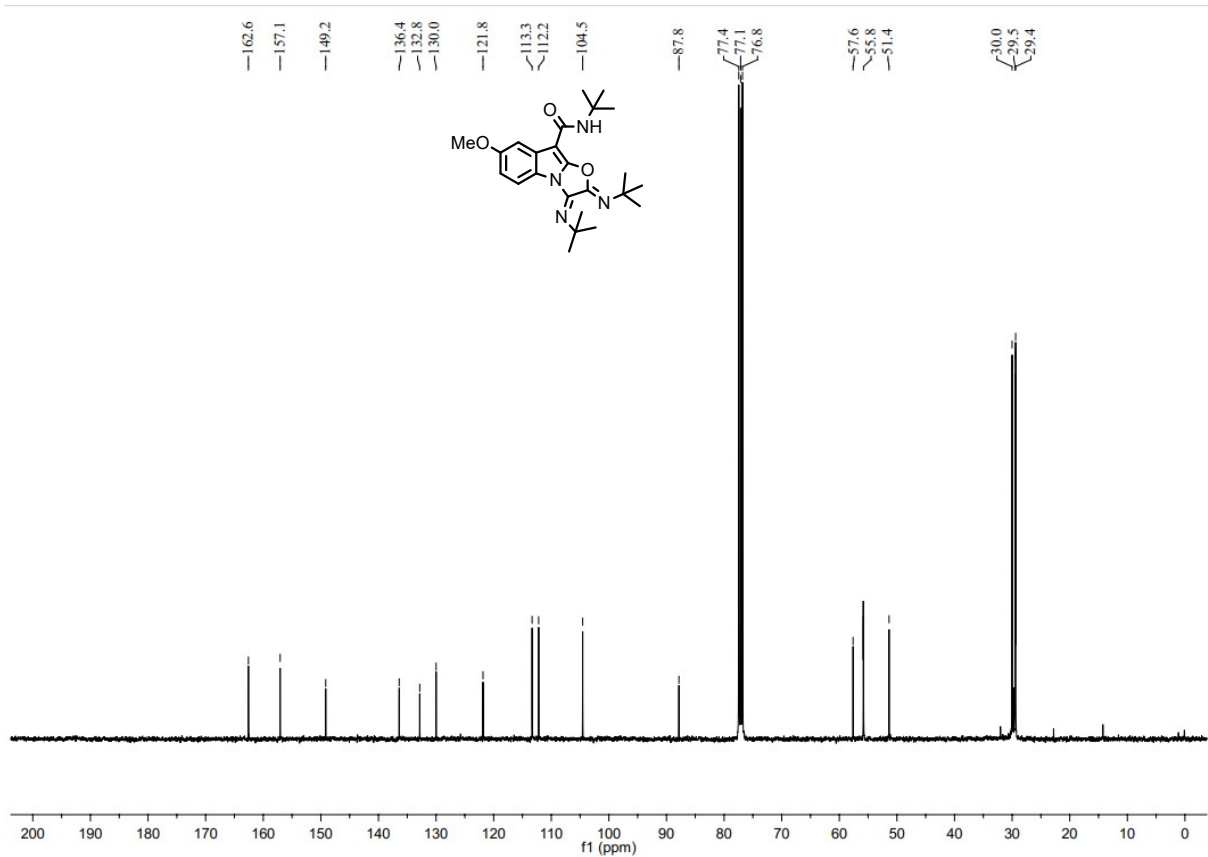

**<sup>1</sup>H NMR (400 MHz, CDCl<sub>3</sub>) and <sup>13</sup>C{<sup>1</sup>H} NMR (100 MHz, CDCl<sub>3</sub>) spectra of 3e**

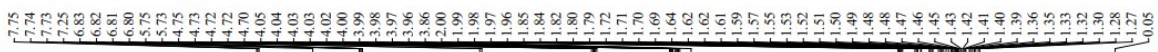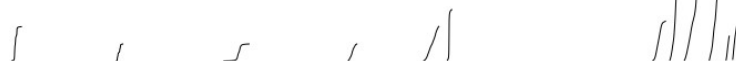

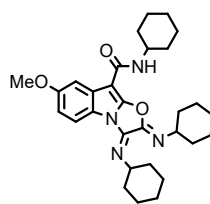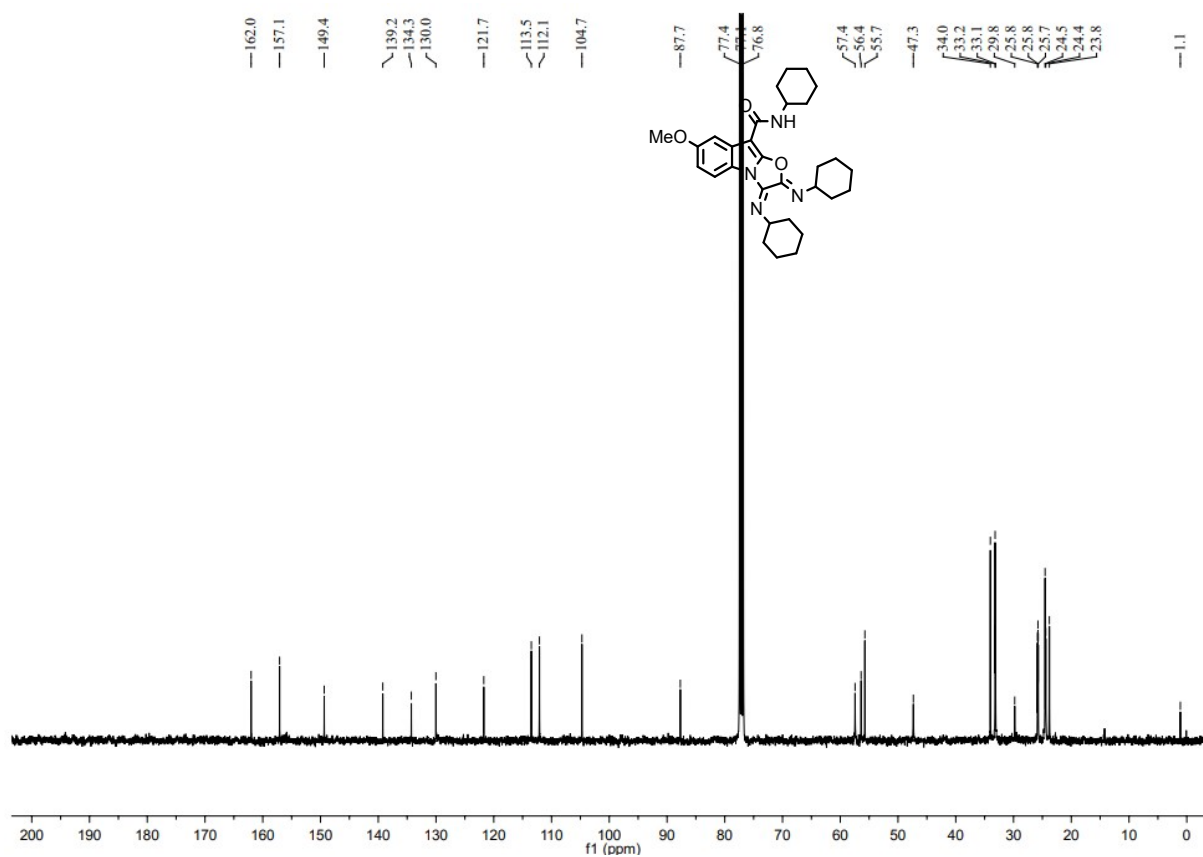

**$^1\text{H}$  NMR (400 MHz,  $\text{CDCl}_3$ ) and  $^{13}\text{C}\{^1\text{H}\}$  NMR (100 MHz,  $\text{CDCl}_3$ ) spectra of 3f**

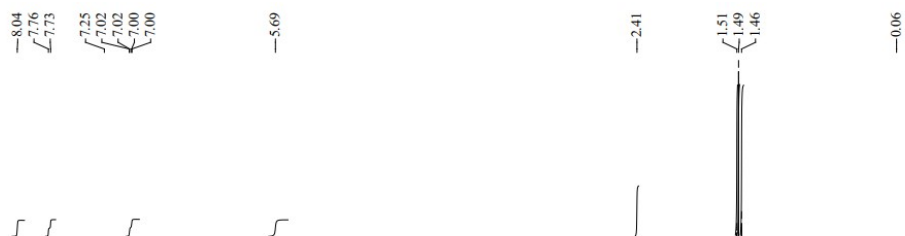

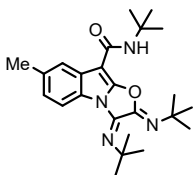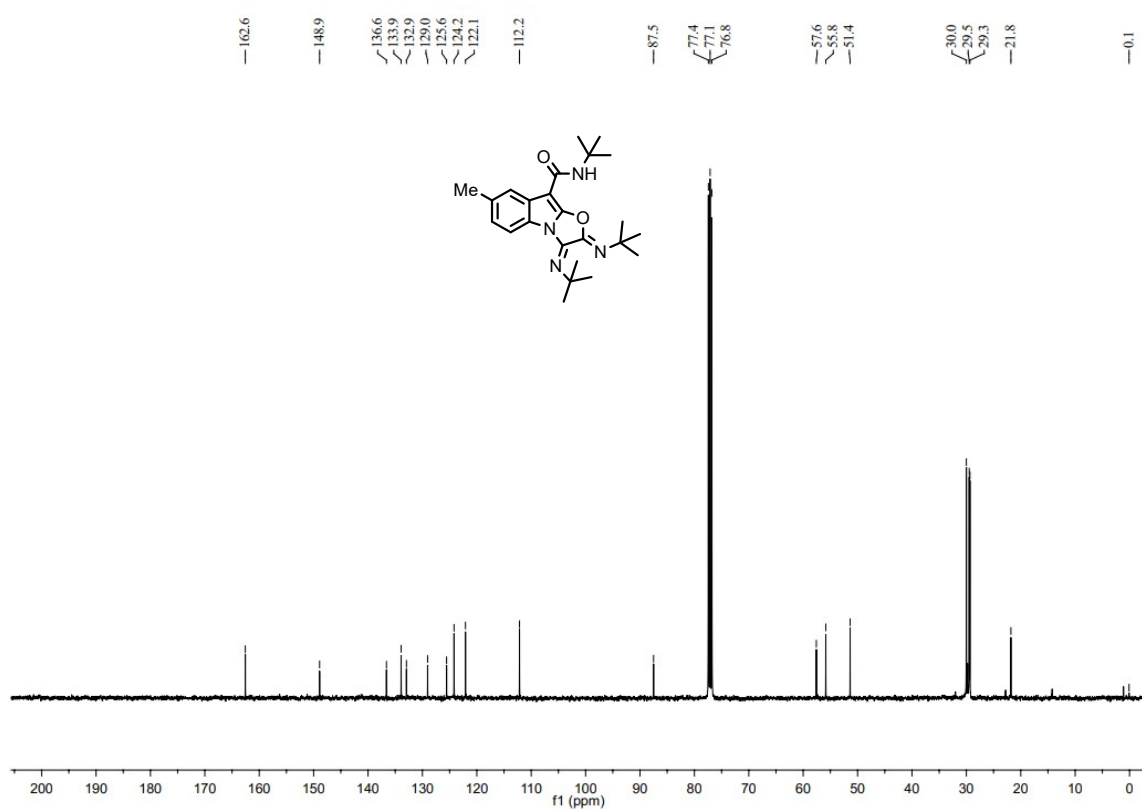

**$^1\text{H}$  NMR (400 MHz,  $\text{CDCl}_3$ ) and  $^{13}\text{C}\{^1\text{H}\}$  NMR (100 MHz,  $\text{CDCl}_3$ ) spectra of 3g**

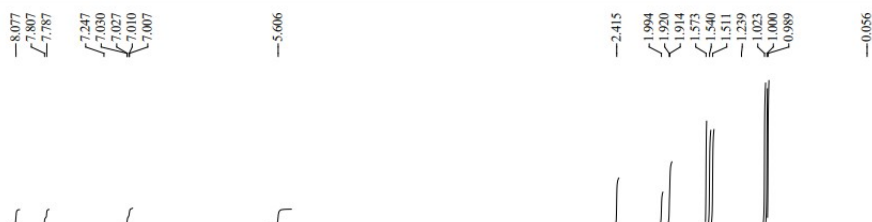

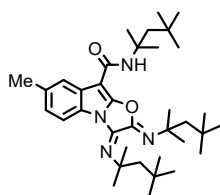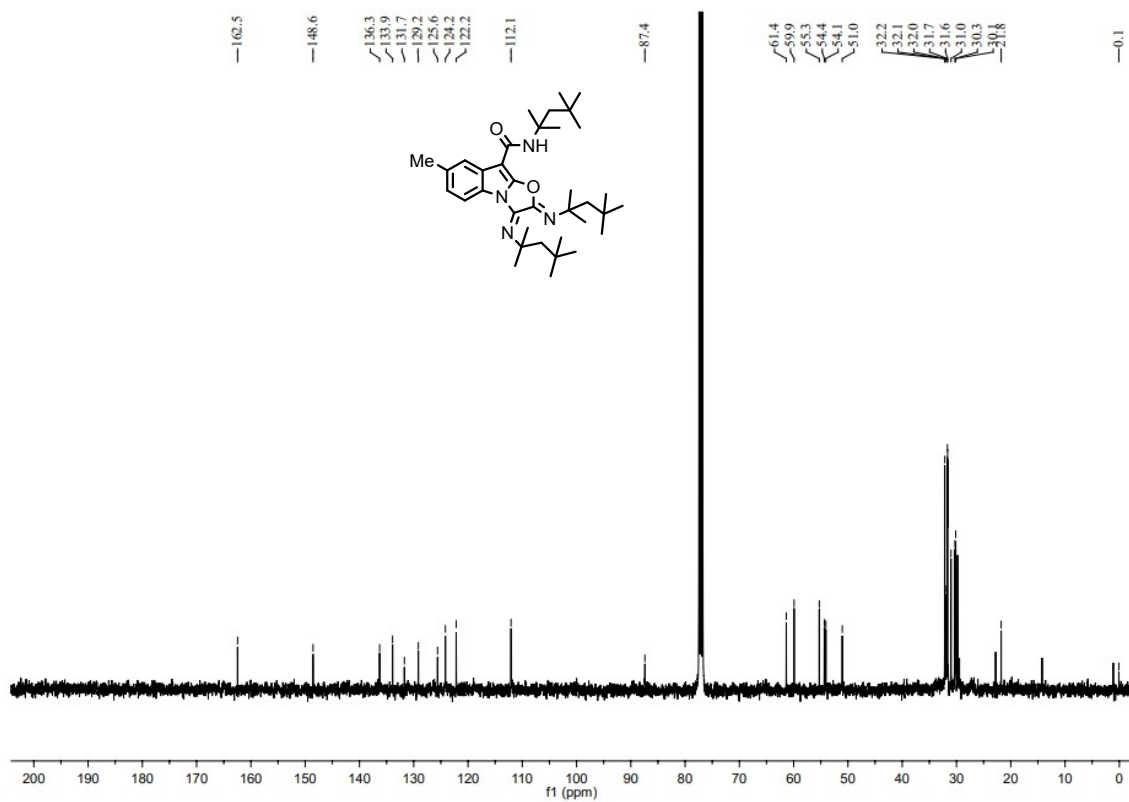

$^1\text{H}$  NMR (400 MHz,  $\text{CDCl}_3$ ) and  $^{13}\text{C}\{^1\text{H}\}$  NMR (100 MHz,  $\text{CDCl}_3$ ) spectra of 3h

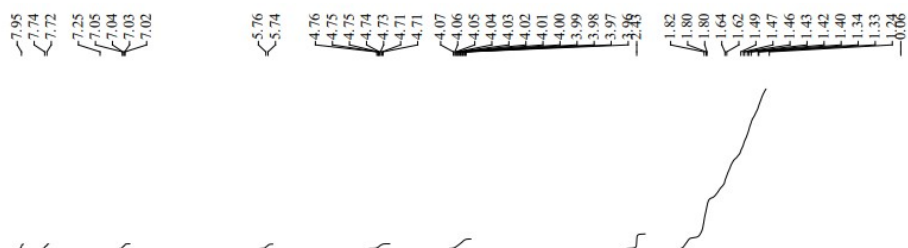

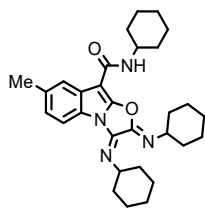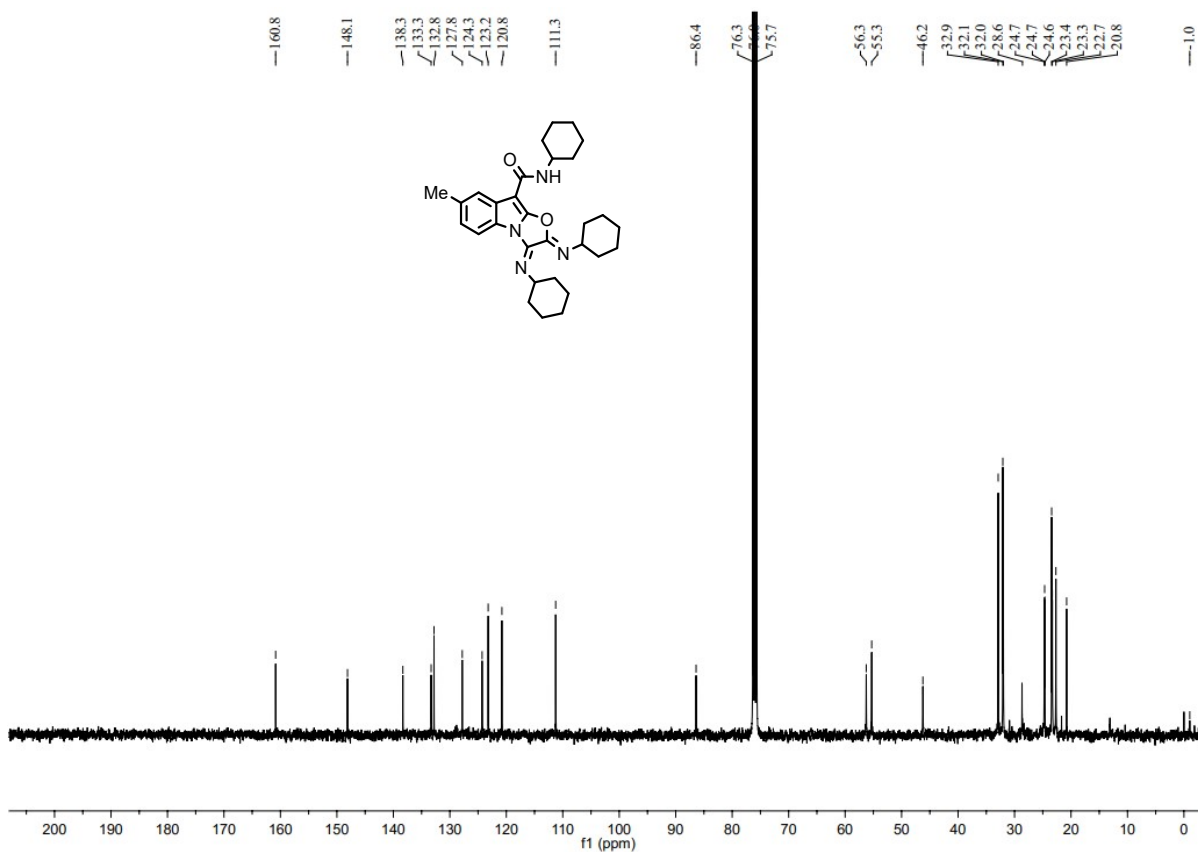

**$^1\text{H}$  NMR (400 MHz,  $\text{CDCl}_3$ ) and  $^{13}\text{C}\{^1\text{H}\}$  NMR (100 MHz,  $\text{CDCl}_3$ ) spectra of 3i**

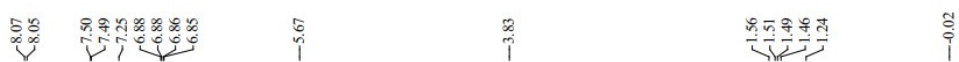

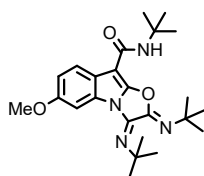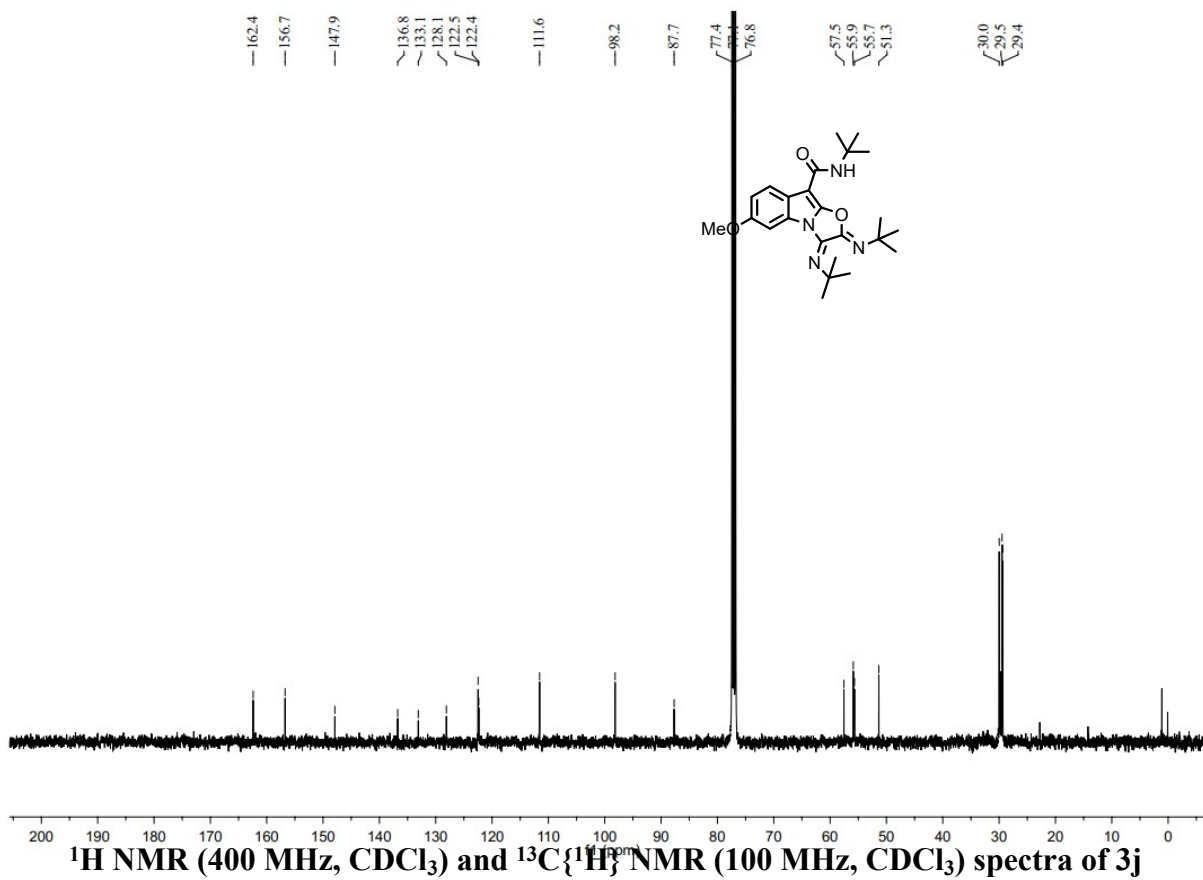

<sup>13</sup>C NMR peaks (ppm): 162.4, 156.7, 147.9, 136.8, 133.1, 128.1, 122.5, 122.4, 111.6, 98.2, 87.7, 77.4, 76.8, 57.5, 55.9, 55.7, 51.3, 30.0, 29.5, 29.4

<sup>1</sup>H NMR peaks (ppm): 8.01, 7.99, 7.46, 7.45, 7.25, 6.89, 6.88, 6.87, 5.73, 5.71, 4.77, 4.76, 4.75, 4.74, 4.73, 4.72, 4.71, 4.05, 4.04, 4.03, 4.01, 3.99, 3.99, 3.98, 3.96, 3.85, 1.82, 1.80, 1.80, 1.64, 1.62, 1.58, 1.50, 1.49, 1.47, 1.46, 1.45, 1.42, 1.40, 1.34, 1.32, 1.29, 1.29, 0.06, 0.02

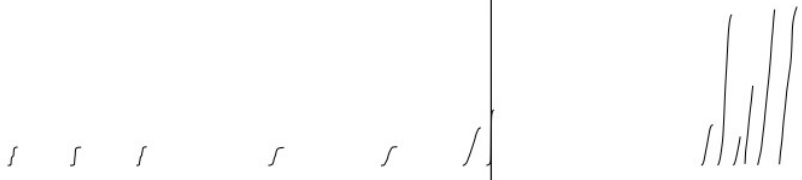

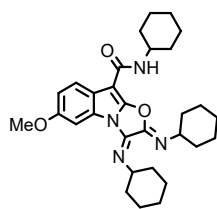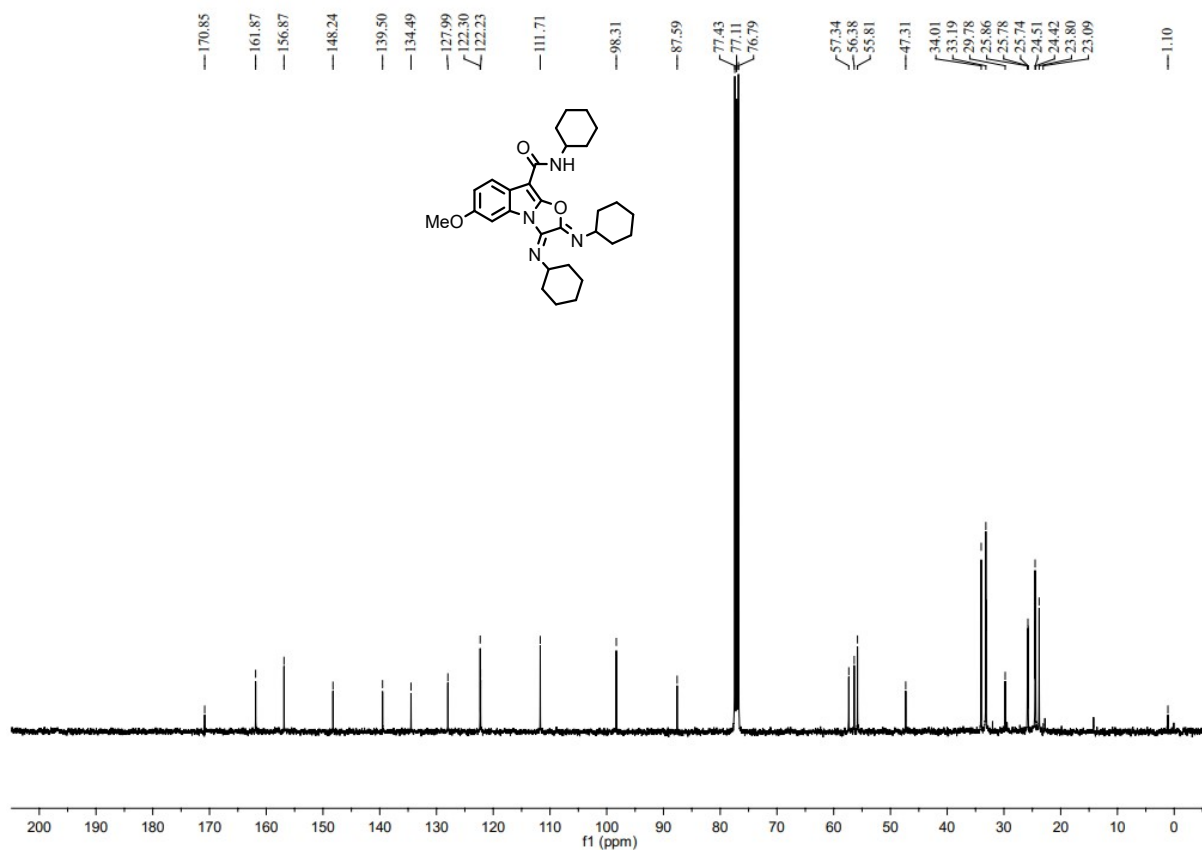

**<sup>1</sup>H NMR (400 MHz, CDCl<sub>3</sub>) and <sup>13</sup>C{<sup>1</sup>H} NMR (100 MHz, CDCl<sub>3</sub>) spectra of 31**

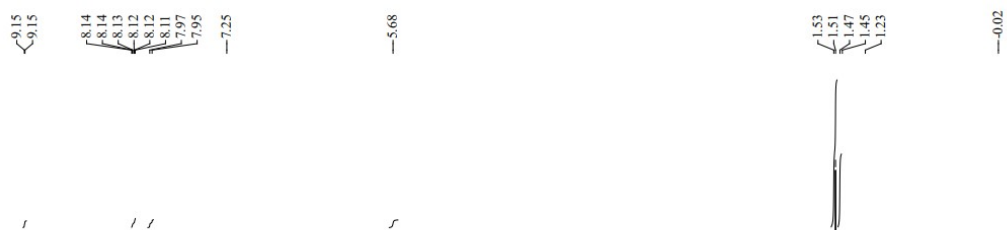

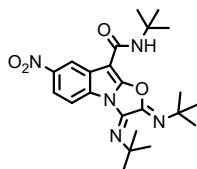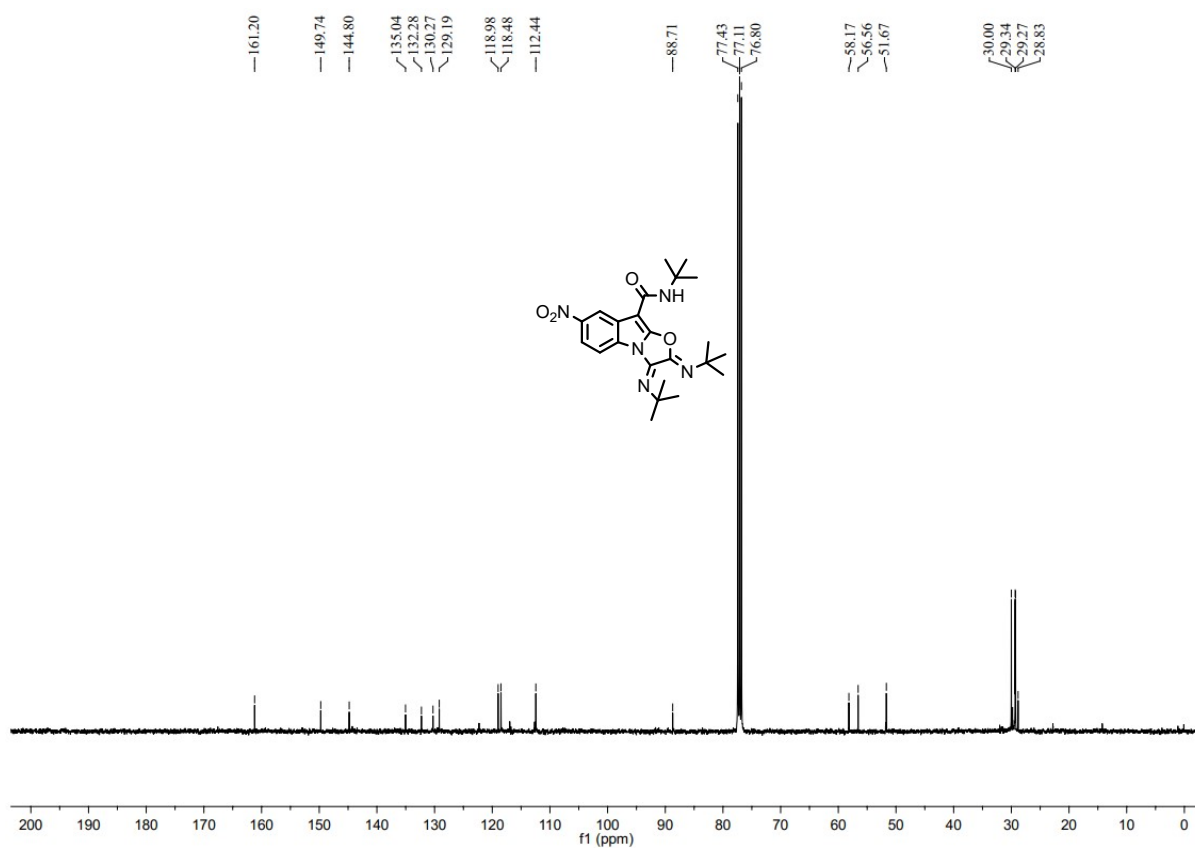

**$^1\text{H}$  NMR (700 MHz,  $\text{CDCl}_3$ ),  $^{13}\text{C}\{^1\text{H}\}$  NMR (175 MHz,  $\text{CDCl}_3$ ),  $^{19}\text{F}\{^1\text{H}\}$  NMR (376 MHz,  $\text{CDCl}_3$ ) spectra of 3m**

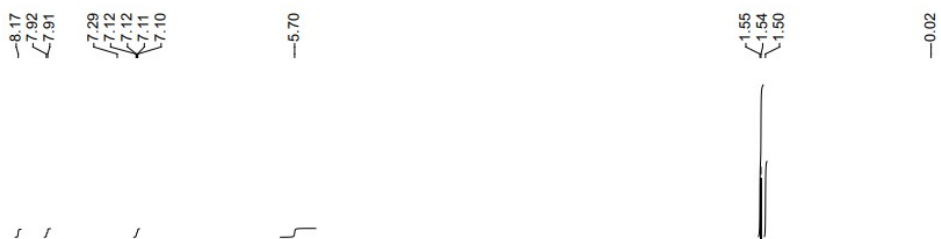



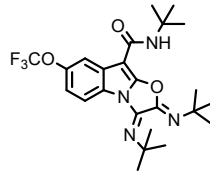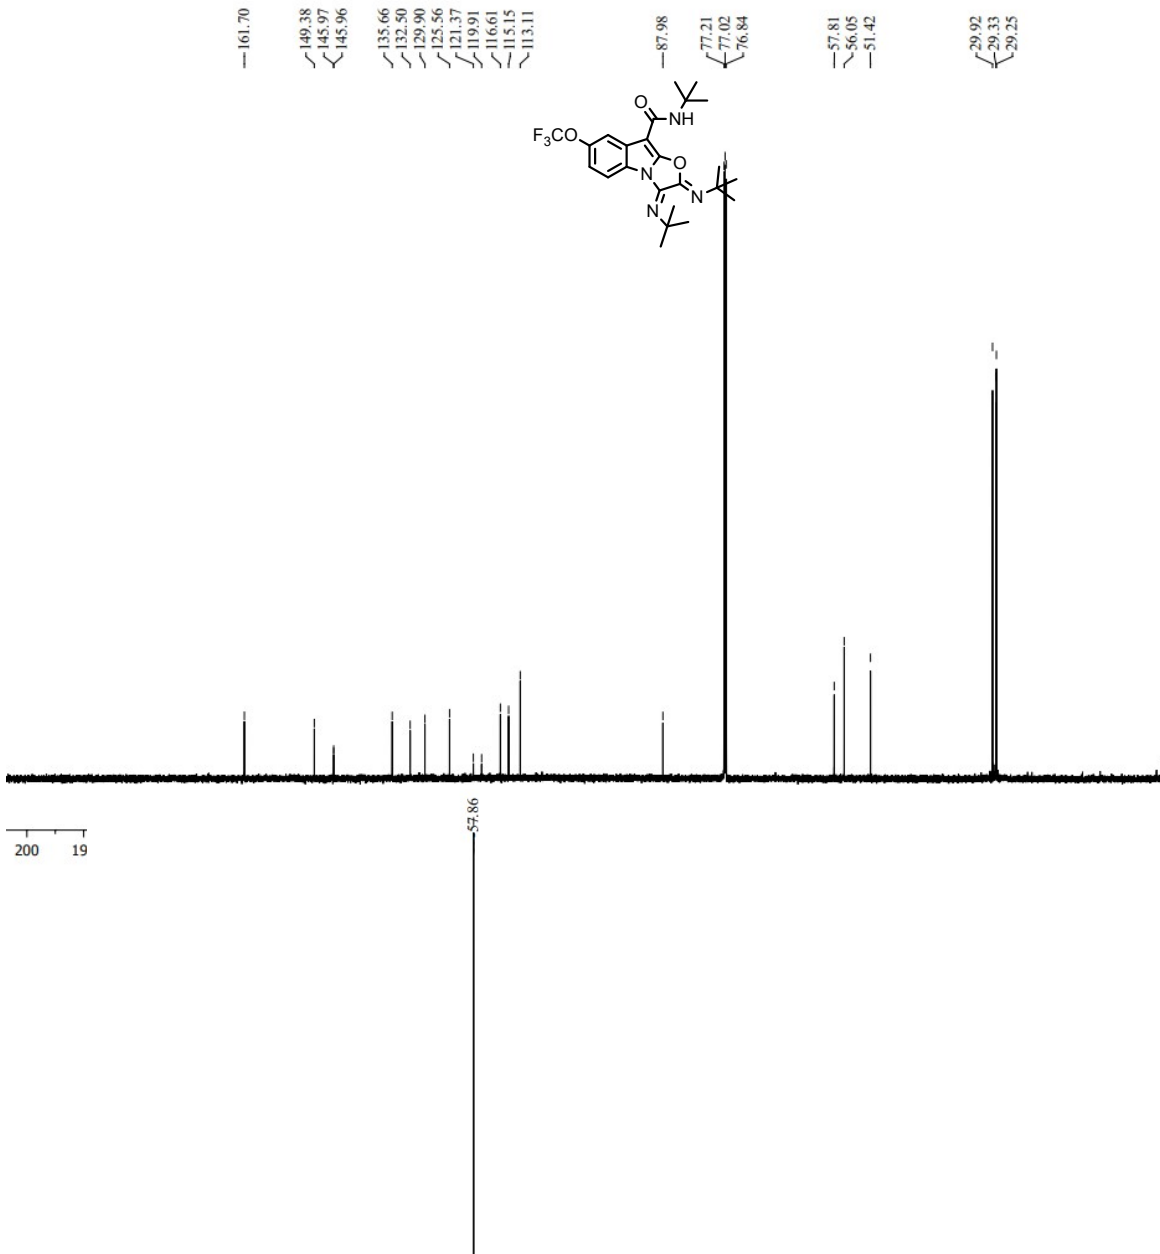

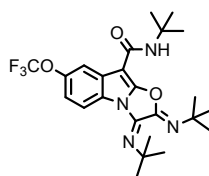

**$^1\text{H}$  NMR (700 MHz,  $\text{CDCl}_3$ ),  $^{13}\text{C}\{^1\text{H}\}$  NMR (175 MHz,  $\text{CDCl}_3$ ) and  $^{19}\text{F}\{^1\text{H}\}$  NMR (376 MHz,  $\text{CDCl}_3$ ) spectra of 3q**

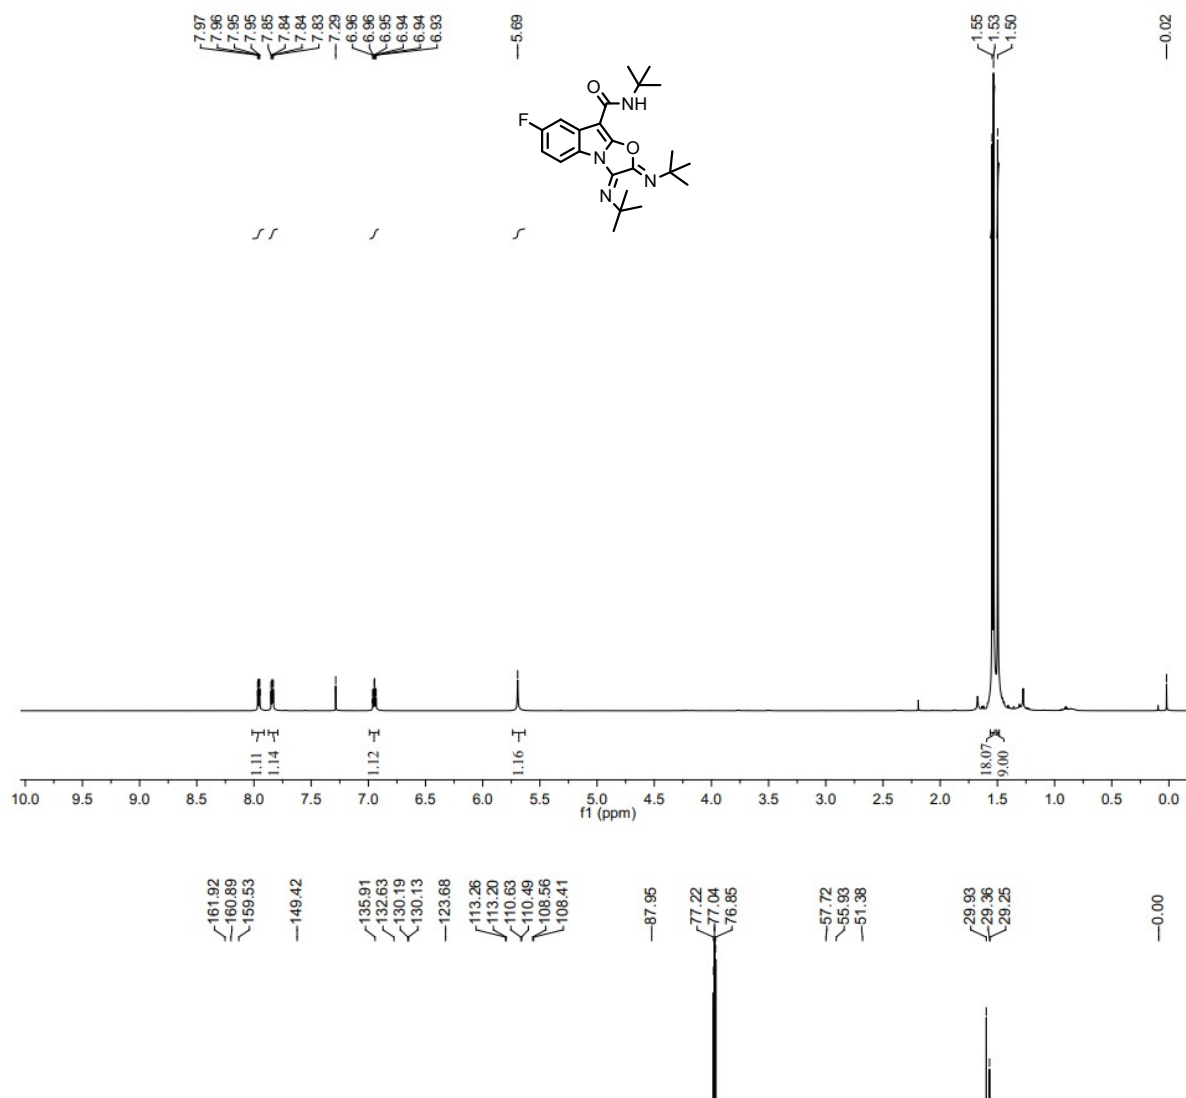

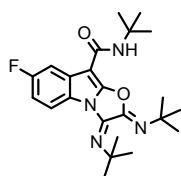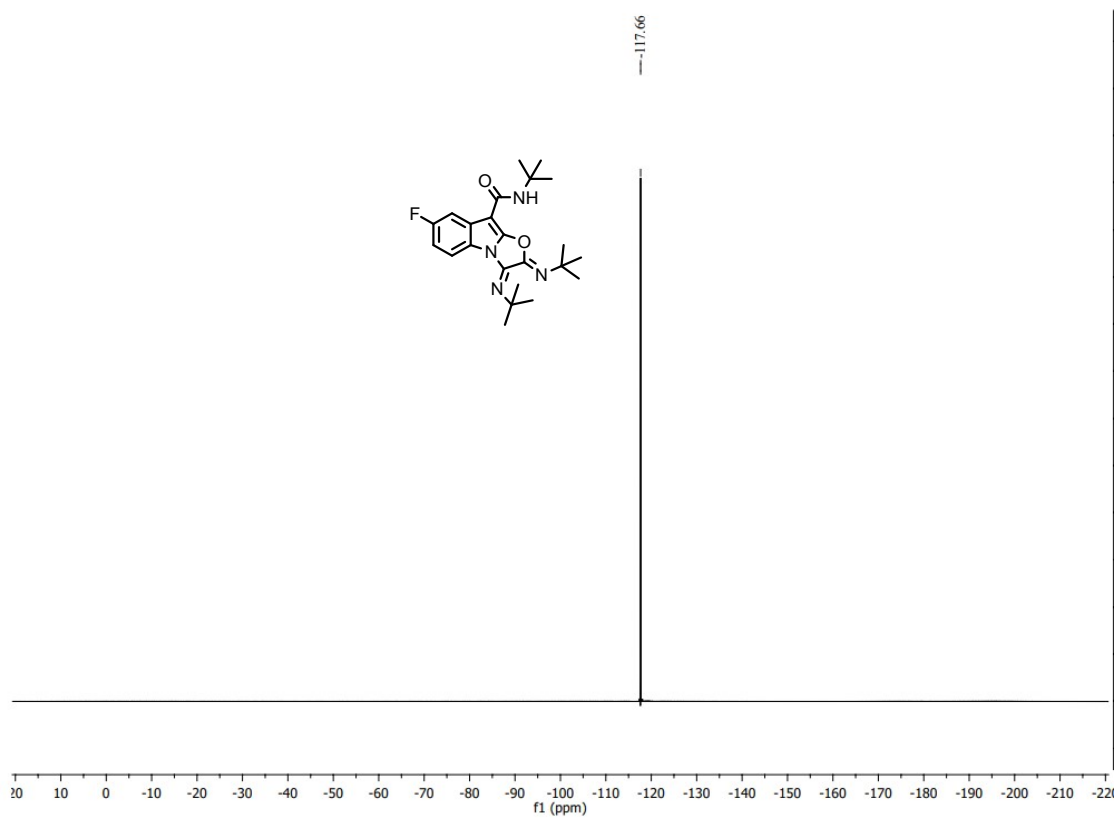

$^1\text{H}$  NMR (400 MHz,  $\text{CDCl}_3$ ) and  $^{13}\text{C}\{^1\text{H}\}$  NMR (100 MHz,  $\text{CDCl}_3$ ) spectra of 3r

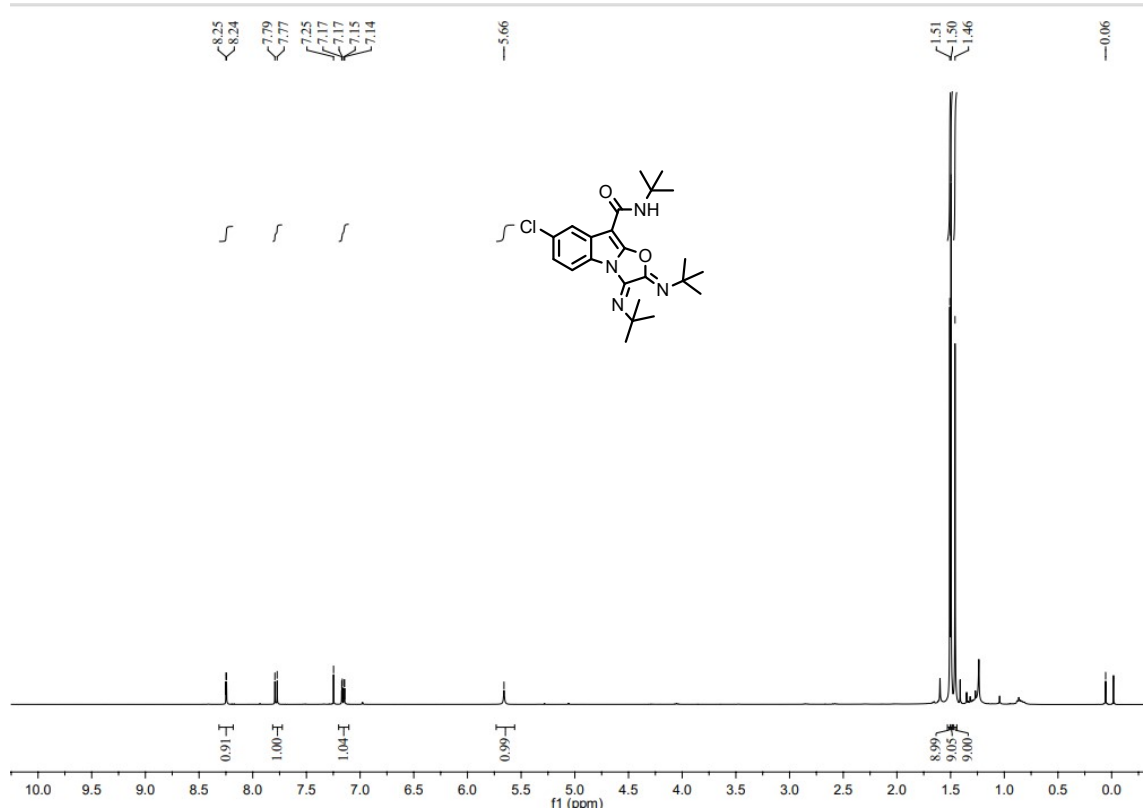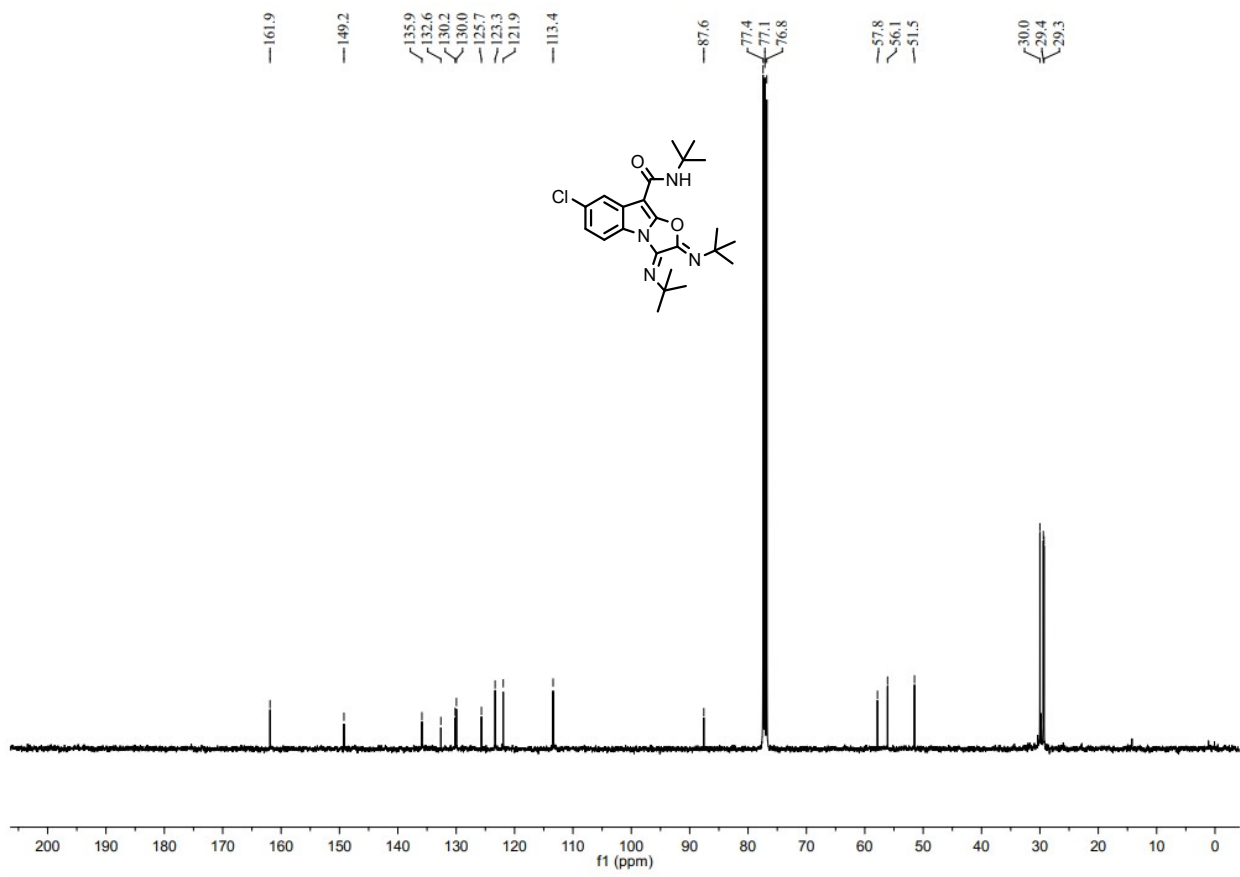

**<sup>1</sup>H NMR (400 MHz, CDCl<sub>3</sub>) and <sup>13</sup>C{<sup>1</sup>H} NMR (100 MHz, CDCl<sub>3</sub>) spectra of 3s**

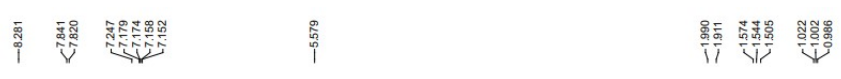

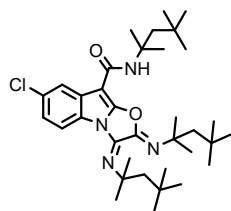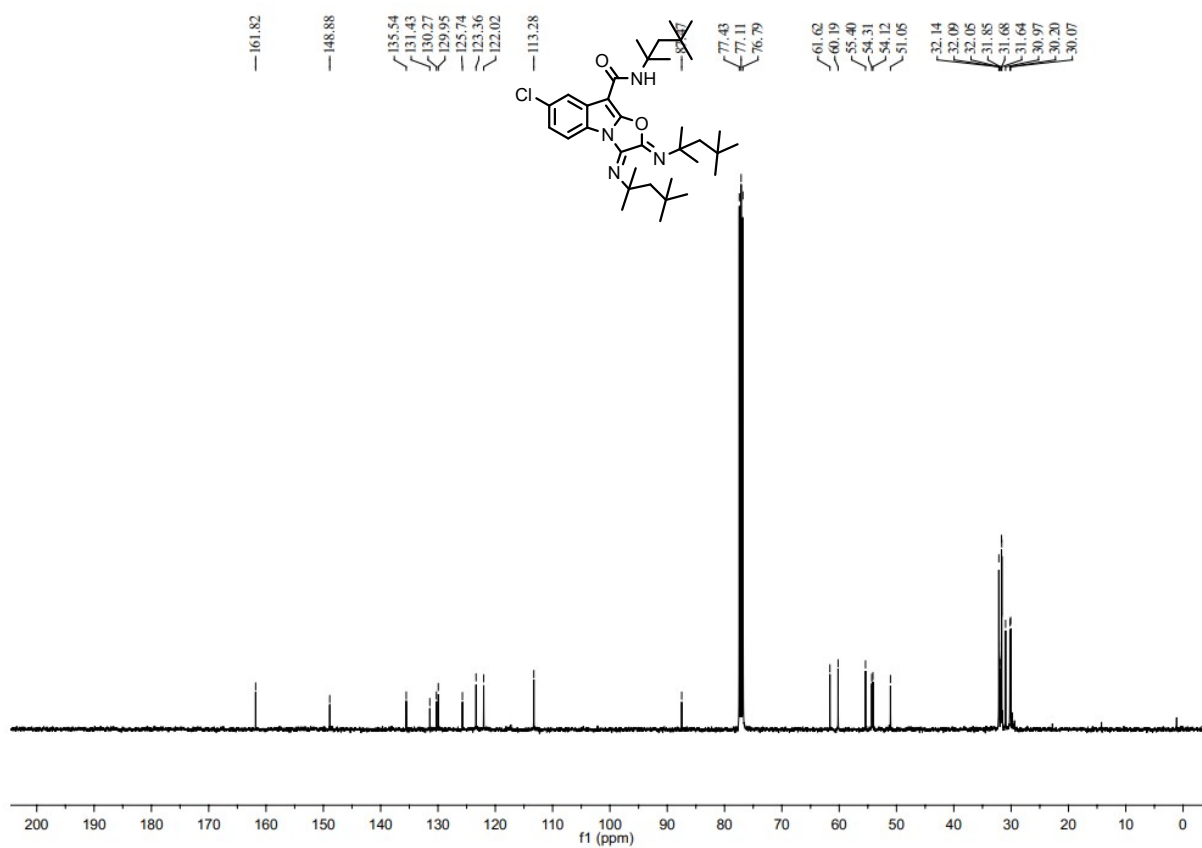

$^1\text{H}$  NMR (400 MHz,  $\text{CDCl}_3$ ) and  $^{13}\text{C}\{^1\text{H}\}$  NMR (100 MHz,  $\text{CDCl}_3$ ) spectra of 3t

8.41  
8.41

7.74  
7.72  
7.31  
7.31  
7.29  
7.29

5.66

1.50  
1.49  
1.46

0.05

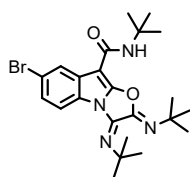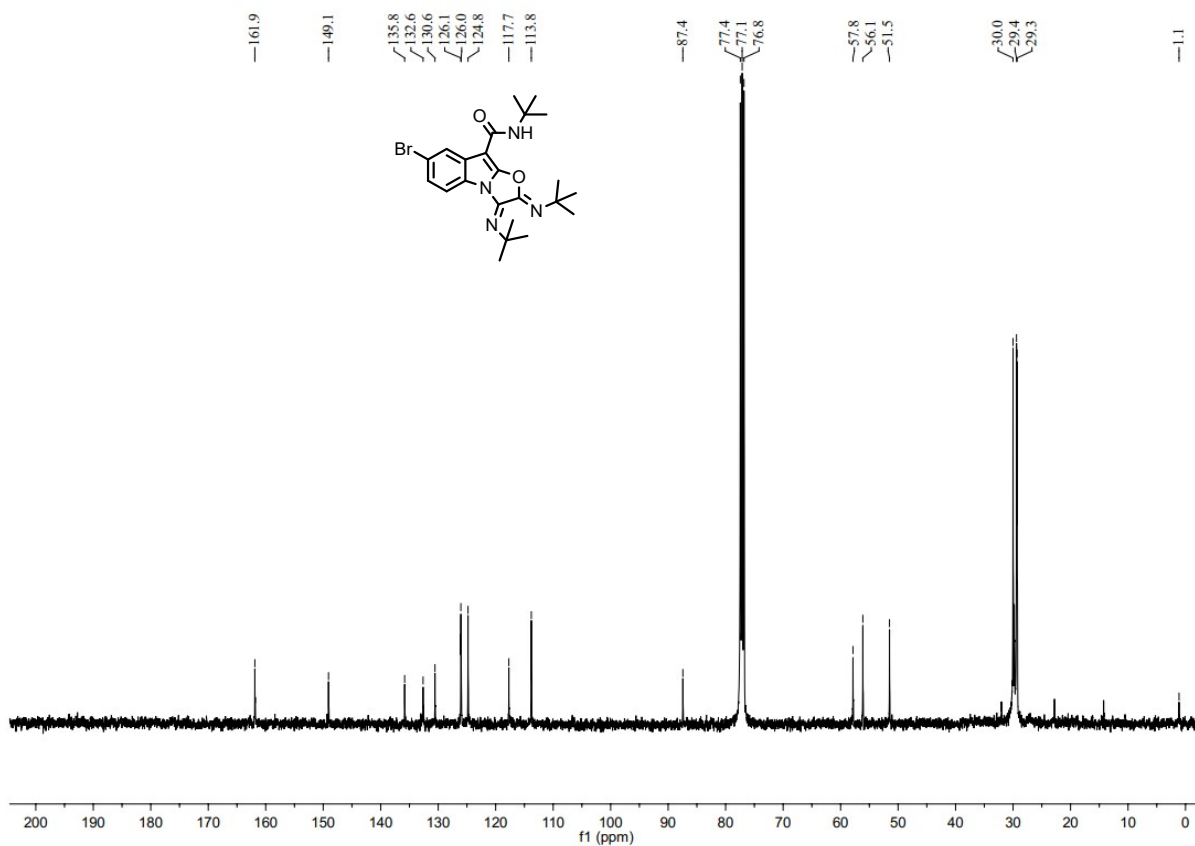

$^1\text{H}$  NMR (400 MHz,  $\text{CDCl}_3$ ) and  $^{13}\text{C}\{^1\text{H}\}$  NMR (100 MHz,  $\text{CDCl}_3$ ) spectra of 3u

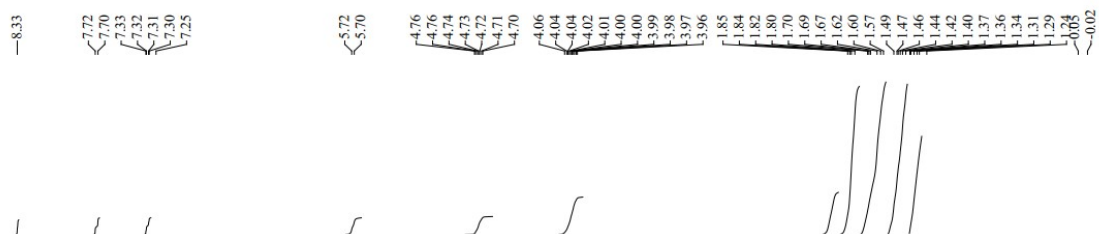

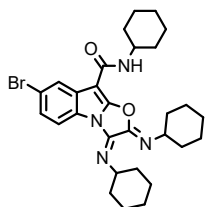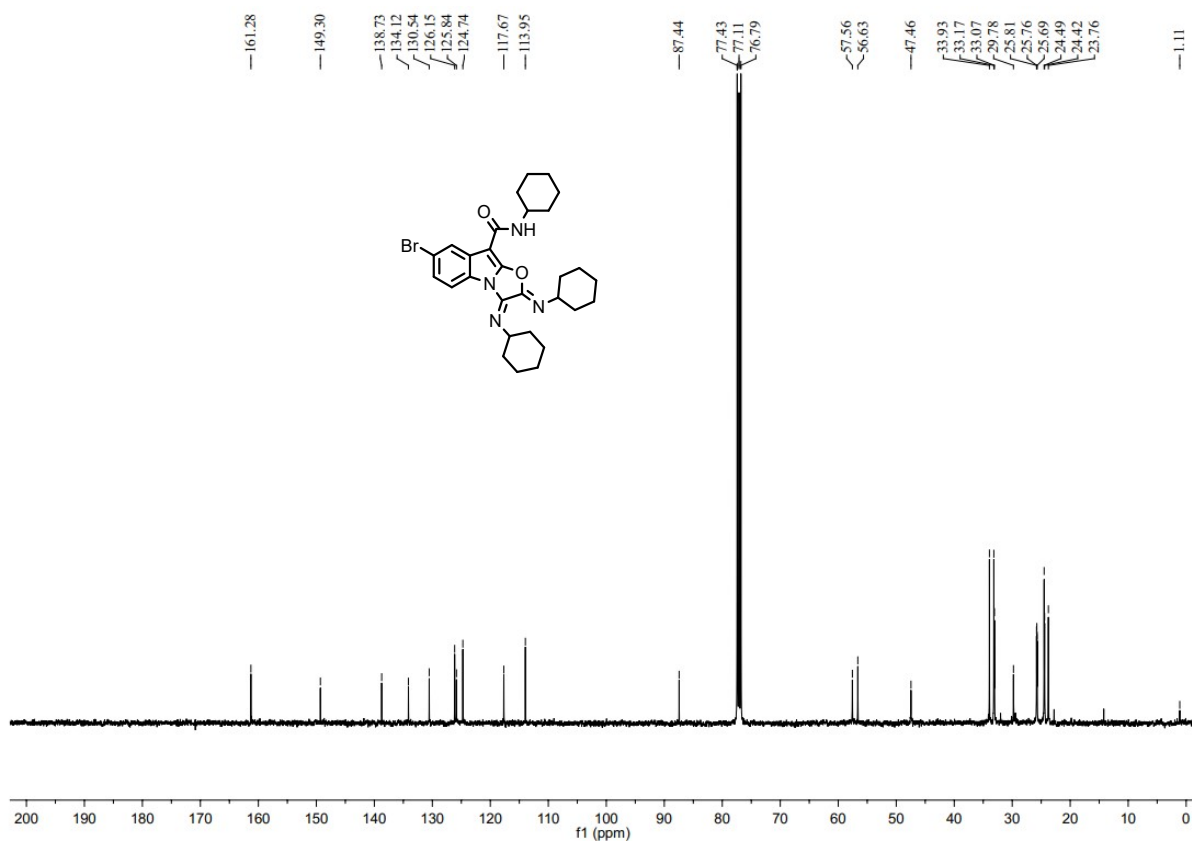

$^1\text{H}$  NMR (700 MHz,  $\text{CDCl}_3$ ) and  $^{13}\text{C}\{^1\text{H}\}$  NMR (175 MHz,  $\text{CDCl}_3$ ) spectra of 3v

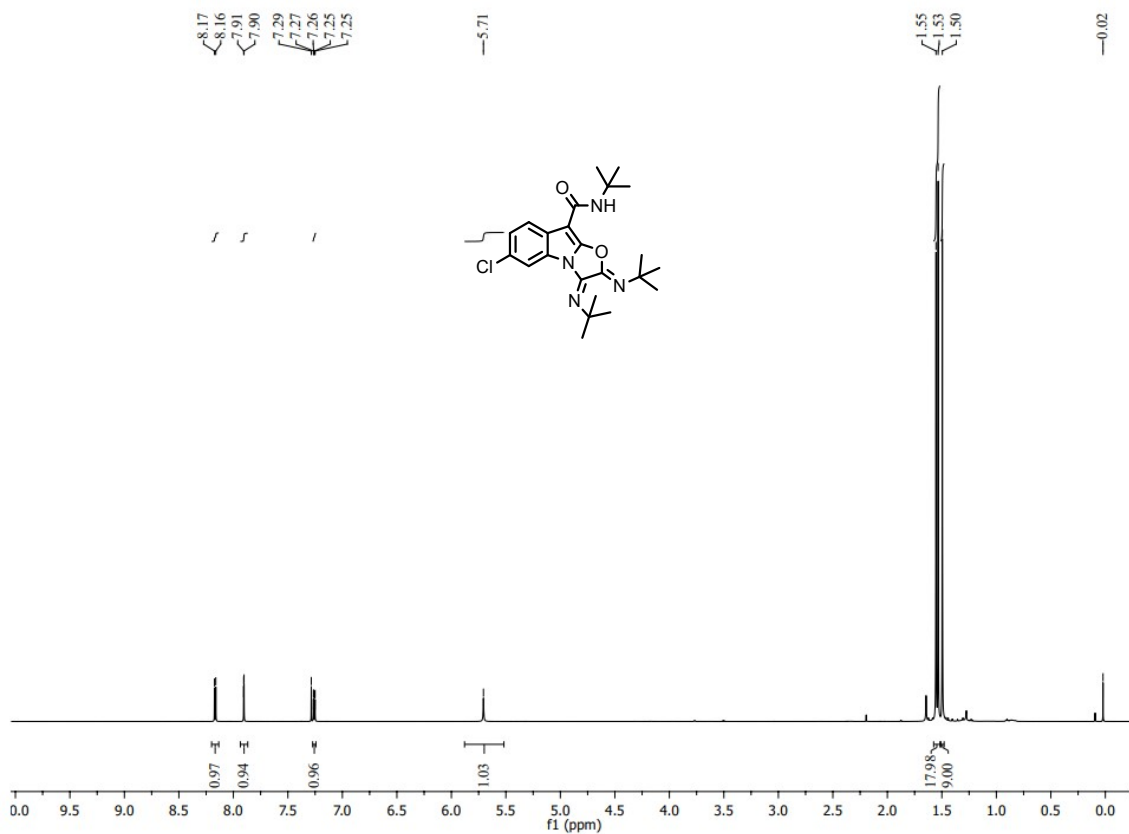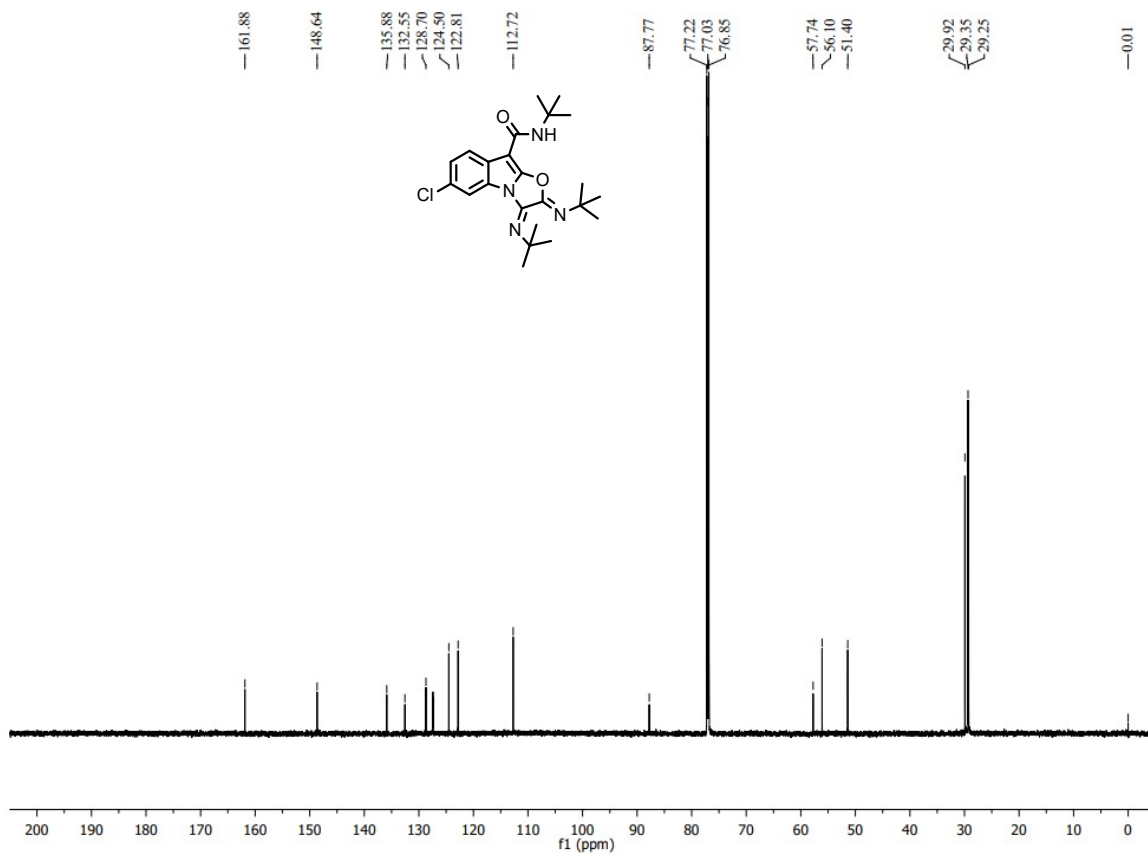

**<sup>1</sup>H NMR (400 MHz, CDCl<sub>3</sub>) and <sup>13</sup>C{<sup>1</sup>H} NMR (100 MHz, CDCl<sub>3</sub>) spectra of 4**

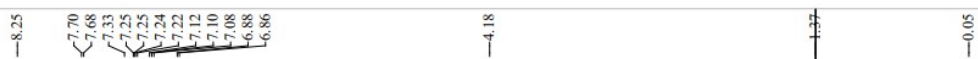



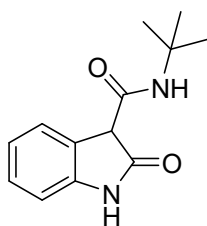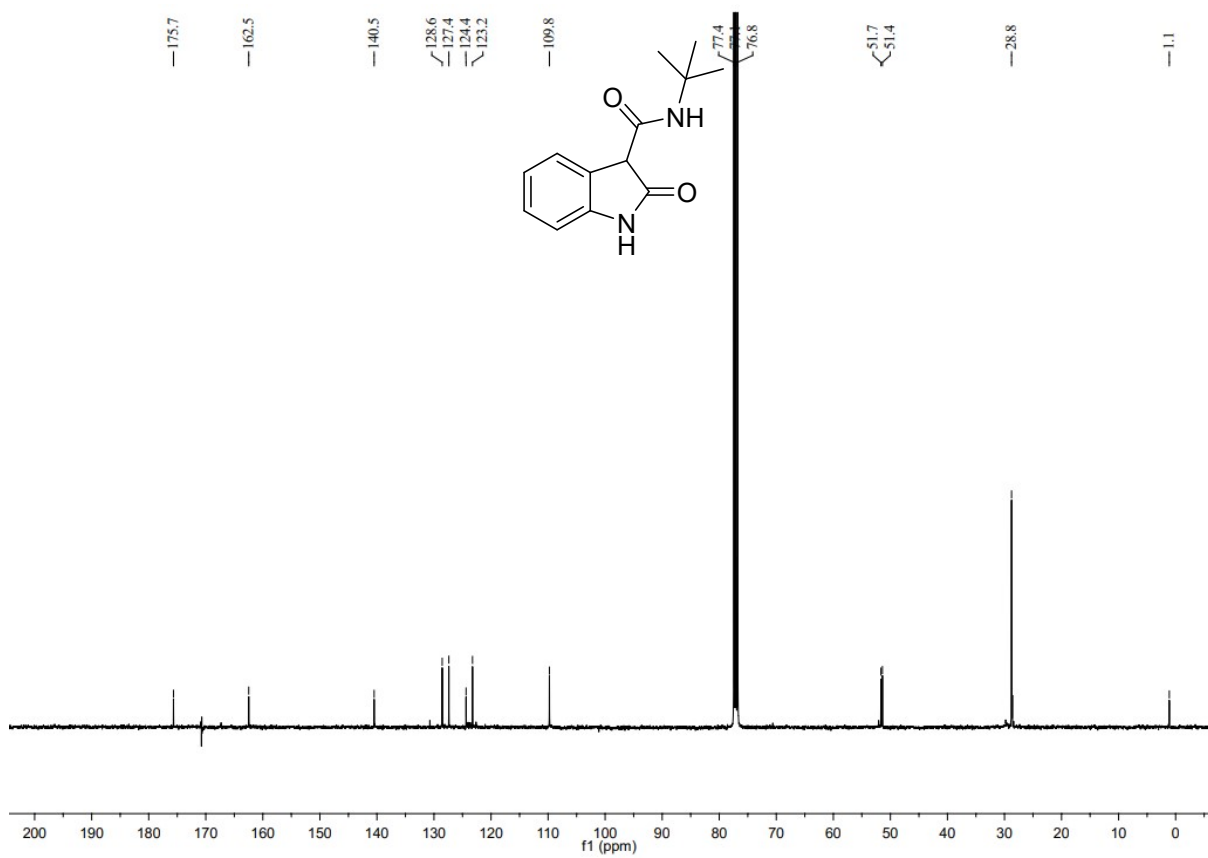

Computational details

All of the structures in the study were optimized using the DFT-B3LYP<sup>7</sup> method with the 6-31+G(d,p)<sup>8</sup> basis set for all atoms except for Pd, which uses the SDD method with its own electrostatic potential<sup>9</sup>. The optimization has been conducted in presence of solvent 1,4-Dioxane using solvation model density (SMD) approximation<sup>10</sup>. At the same level of theory, frequency studies were also done to make sure that the stationary points were either local minimums (with no imaginary frequencies) or transition states (with one imaginary frequency). Further energy refinement was also done using single-point calculations on the optimized geometries at the Minnesota density functional M06<sup>11</sup> with a larger basis set 6-31++G(2d,2p)<sup>12</sup> for all non-metal atoms. The previous level's basis for Pd and solvent corrections was maintained. The solvated Gibbs free energy, which was utilized for discussion, was determined by adding thermal correction to the Gibbs energy with the single-point electronic energy. The visualization and results analysis were carried out by using Chemcraft visualization Software.<sup>13</sup> All the DFT calculations were performed using Gaussian 16 program.<sup>14</sup>

1. [1a] 3-diazo oxindole

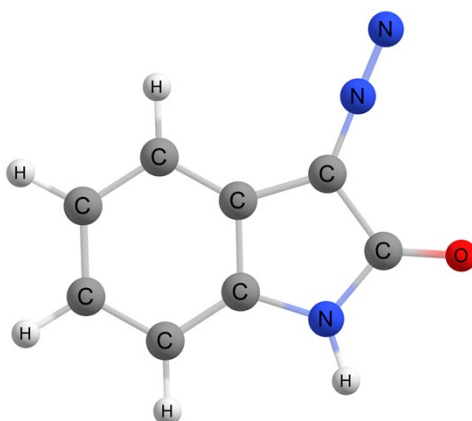

|                                              |                             |
|----------------------------------------------|-----------------------------|
| Zero-point correction=                       | 0.120545 (Hartree/Particle) |
| Thermal correction to Energy=                | 0.129484                    |
| Thermal correction to Enthalpy=              | 0.130428                    |
| Thermal correction to Gibbs Free Energy=     | 0.086195                    |
| Sum of electronic and zero-point Energies=   | -547.226124                 |
| Sum of electronic and thermal Energies=      | -547.217185                 |
| Sum of electronic and thermal Enthalpies=    | -547.216241                 |
| Sum of electronic and thermal Free Energies= | -547.260474                 |

|   |              |              |              |
|---|--------------|--------------|--------------|
| C | 0.333776000  | -0.454081000 | 0.000000000  |
| C | 0.817770000  | 0.875940000  | 0.000000000  |
| C | 2.180394000  | 1.149056000  | 0.000000000  |
| C | 3.065993000  | 0.062263000  | 0.000000000  |
| C | 2.595946000  | -1.256750000 | 0.000000000  |
| C | 1.221738000  | -1.527766000 | 0.000000000  |
| C | -1.115192000 | -0.329748000 | 0.000000000  |
| C | -1.489863000 | 1.105651000  | 0.000001000  |
| H | 2.547864000  | 2.170778000  | 0.000000000  |
| H | 4.135232000  | 0.251388000  | 0.000000000  |
| H | 3.302857000  | -2.080656000 | 0.000000000  |
| H | 0.859172000  | -2.551540000 | 0.000000000  |
| N | -2.005555000 | -1.279255000 | 0.000000000  |
| N | -2.800354000 | -2.093690000 | 0.000000000  |
| O | -2.600427000 | 1.624262000  | 0.000000000  |
| N | -0.266186000 | 1.758810000  | 0.000000000  |
| H | -0.200423000 | 2.767499000  | -0.000001000 |

2. [2a] *tert*-butyl isocyanide

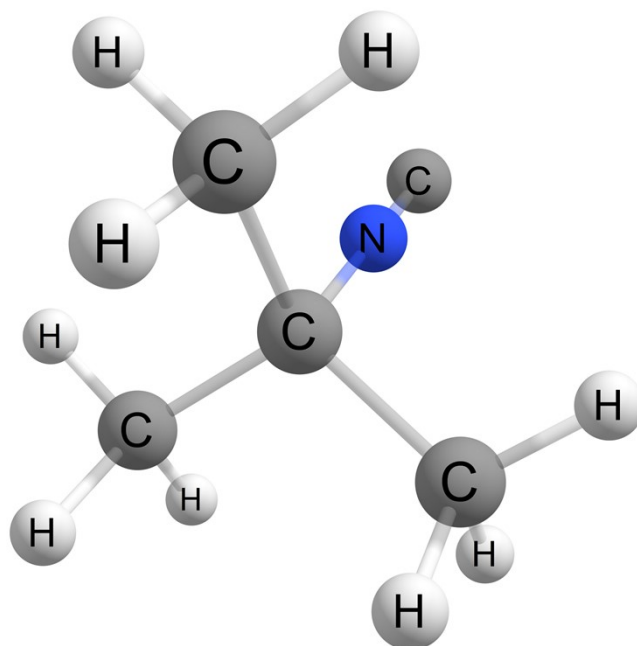

|                                              |                             |
|----------------------------------------------|-----------------------------|
| Zero-point correction=                       | 0.129804 (Hartree/Particle) |
| Thermal correction to Energy=                | 0.137123                    |
| Thermal correction to Enthalpy=              | 0.138067                    |
| Thermal correction to Gibbs Free Energy=     | 0.099622                    |
| Sum of electronic and zero-point Energies=   | -250.563278                 |
| Sum of electronic and thermal Energies=      | -250.555959                 |
| Sum of electronic and thermal Enthalpies=    | -250.555015                 |
| Sum of electronic and thermal Free Energies= | -250.593461                 |

|   |              |              |              |
|---|--------------|--------------|--------------|
| C | 0.261415000  | -0.000017000 | -0.000075000 |
| C | 0.733521000  | 1.172140000  | -0.877687000 |
| H | 0.371282000  | 2.125679000  | -0.481890000 |
| H | 1.827615000  | 1.196609000  | -0.896764000 |
| H | 0.370334000  | 1.061744000  | -1.903860000 |
| C | 0.734078000  | 0.173999000  | 1.453659000  |
| H | 0.371346000  | 1.118112000  | 1.871007000  |
| H | 0.371803000  | -0.645256000 | 2.081926000  |
| H | 1.828187000  | 0.177960000  | 1.483997000  |
| C | 0.733438000  | -1.346236000 | -0.576309000 |
| H | 0.370425000  | -2.179457000 | 0.032820000  |
| H | 0.371086000  | -1.480666000 | -1.599885000 |
| H | 1.827519000  | -1.374960000 | -0.588158000 |
| N | -1.188281000 | 0.000110000  | 0.000200000  |
| C | -2.361057000 | 0.000025000  | 0.000313000  |

### 3. [Pd(OAc)<sub>2</sub>]

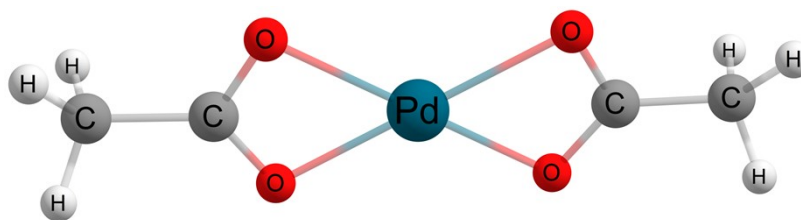

|                                              |                             |
|----------------------------------------------|-----------------------------|
| Zero-point correction=                       | 0.102793 (Hartree/Particle) |
| Thermal correction to Energy=                | 0.111825                    |
| Thermal correction to Enthalpy=              | 0.112769                    |
| Thermal correction to Gibbs Free Energy=     | 0.067170                    |
| Sum of electronic and zero-point Energies=   | -584.850767                 |
| Sum of electronic and thermal Energies=      | -584.841736                 |
| Sum of electronic and thermal Enthalpies=    | -584.840792                 |
| Sum of electronic and thermal Free Energies= | -584.886391                 |

|    |              |              |              |
|----|--------------|--------------|--------------|
| Pd | -0.000029000 | -0.001028000 | -0.008675000 |
| O  | 1.766433000  | 1.086931000  | -0.010472000 |
| C  | 2.446751000  | 0.000245000  | -0.005206000 |
| O  | -1.768465000 | -1.087042000 | -0.010156000 |
| C  | -2.446727000 | 0.000784000  | -0.005109000 |
| O  | -1.766155000 | 1.087247000  | -0.010225000 |
| O  | 1.768311000  | -1.087416000 | -0.010290000 |
| C  | -3.937388000 | 0.002259000  | 0.034555000  |
| H  | -4.330941000 | -0.889997000 | -0.457739000 |
| H  | -4.261973000 | -0.009911000 | 1.081928000  |
| H  | -4.329053000 | 0.906168000  | -0.437357000 |
| C  | 3.937411000  | 0.002116000  | 0.034709000  |
| H  | 4.329190000  | 0.889877000  | -0.467117000 |
| H  | 4.261653000  | 0.026955000  | 1.081988000  |
| H  | 4.331179000  | -0.905977000 | -0.427200000 |

#### 4. [I]

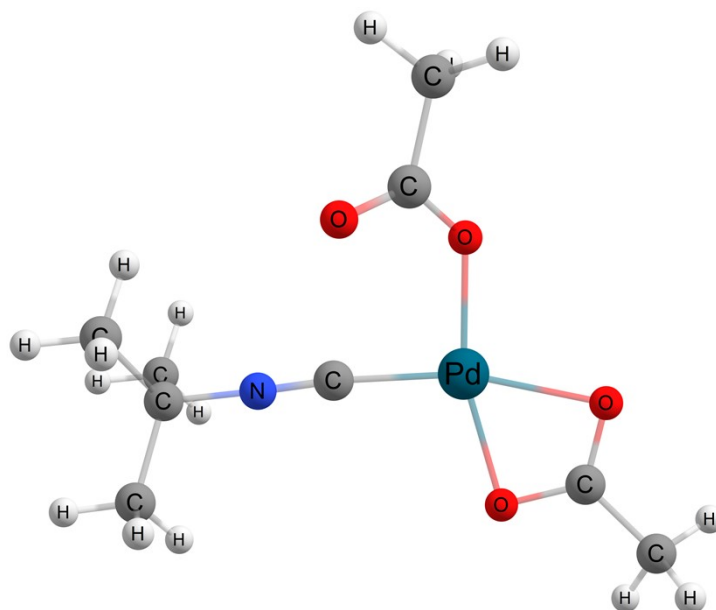

|                                              |                             |
|----------------------------------------------|-----------------------------|
| Zero-point correction=                       | 0.234610 (Hartree/Particle) |
| Thermal correction to Energy=                | 0.254387                    |
| Thermal correction to Enthalpy=              | 0.255331                    |
| Thermal correction to Gibbs Free Energy=     | 0.181893                    |
| Sum of electronic and zero-point Energies=   | -835.445454                 |
| Sum of electronic and thermal Energies=      | -835.425677                 |
| Sum of electronic and thermal Enthalpies=    | -835.424733                 |
| Sum of electronic and thermal Free Energies= | -835.498171                 |

|    |              |              |              |
|----|--------------|--------------|--------------|
| Pd | -1.031426000 | 0.029409000  | 0.114308000  |
| O  | -0.755962000 | 1.984504000  | 0.459467000  |
| C  | 0.135705000  | 2.705767000  | -0.179671000 |
| O  | -1.897257000 | -1.855250000 | -0.135272000 |
| C  | -3.077873000 | -1.346587000 | -0.078932000 |
| O  | -3.166936000 | -0.086280000 | 0.096084000  |
| O  | 0.963936000  | 2.278091000  | -0.984277000 |
| C  | -4.289484000 | -2.207165000 | -0.245829000 |
| H  | -4.557597000 | -2.234072000 | -1.308876000 |
| H  | -4.084319000 | -3.228437000 | 0.083002000  |
| H  | -5.131902000 | -1.786996000 | 0.308460000  |
| C  | 0.028314000  | 4.184911000  | 0.161346000  |
| H  | -0.830348000 | 4.610173000  | -0.370794000 |
| H  | -0.139773000 | 4.332624000  | 1.231455000  |
| H  | 0.933333000  | 4.706107000  | -0.156308000 |
| C  | 0.859155000  | -0.358863000 | 0.067552000  |
| N  | 1.968738000  | -0.705314000 | 0.067957000  |
| C  | 3.371497000  | -1.080921000 | 0.029552000  |
| C  | 3.840475000  | -1.261511000 | 1.483533000  |
| H  | 3.268528000  | -2.047879000 | 1.985390000  |
| H  | 4.897338000  | -1.544769000 | 1.487247000  |

|   |             |              |              |
|---|-------------|--------------|--------------|
| H | 3.728705000 | -0.331224000 | 2.048336000  |
| C | 4.140628000 | 0.051753000  | -0.671016000 |
| H | 5.201274000 | -0.214100000 | -0.717427000 |
| H | 3.772331000 | 0.204221000  | -1.689179000 |
| H | 4.039156000 | 0.992384000  | -0.123118000 |
| C | 3.473874000 | -2.398761000 | -0.757503000 |
| H | 3.106989000 | -2.272108000 | -1.780362000 |
| H | 4.521742000 | -2.710790000 | -0.800624000 |
| H | 2.894968000 | -3.190989000 | -0.273254000 |

## 5. [II]

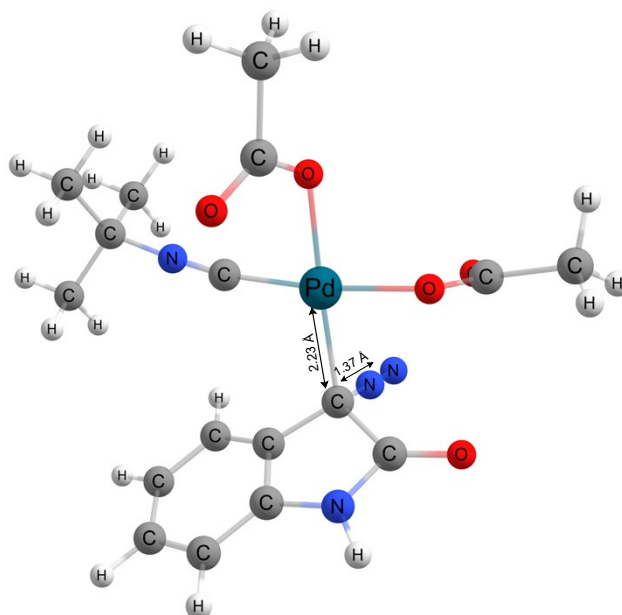

|                                              |                             |
|----------------------------------------------|-----------------------------|
| Zero-point correction=                       | 0.355387 (Hartree/Particle) |
| Thermal correction to Energy=                | 0.386062                    |
| Thermal correction to Enthalpy=              | 0.387006                    |
| Thermal correction to Gibbs Free Energy=     | 0.289401                    |
| Sum of electronic and zero-point Energies=   | -1382.639299                |
| Sum of electronic and thermal Energies=      | -1382.608624                |
| Sum of electronic and thermal Enthalpies=    | -1382.607680                |
| Sum of electronic and thermal Free Energies= | -1382.705284                |

|    |              |              |              |
|----|--------------|--------------|--------------|
| Pd | -0.542834000 | -0.709348000 | -0.060311000 |
| O  | -0.096509000 | -2.679217000 | 0.315751000  |
| C  | 0.440075000  | -2.945968000 | 1.477634000  |
| O  | -2.899759000 | -1.172661000 | -1.838134000 |
| C  | -3.238721000 | -1.391972000 | -0.665927000 |
| O  | -2.467397000 | -1.207920000 | 0.370017000  |
| O  | 0.811419000  | -2.111739000 | 2.309061000  |
| C  | -4.611705000 | -1.941299000 | -0.324635000 |
| H  | -5.330851000 | -1.656987000 | -1.096126000 |
| H  | -4.552461000 | -3.036085000 | -0.293406000 |
| H  | -4.948368000 | -1.592390000 | 0.654411000  |
| C  | 0.547711000  | -4.441507000 | 1.748589000  |

|   |              |              |              |
|---|--------------|--------------|--------------|
| H | -0.396634000 | -4.781165000 | 2.190025000  |
| H | 0.710240000  | -5.009088000 | 0.828947000  |
| H | 1.350633000  | -4.634399000 | 2.463770000  |
| C | 1.374217000  | -0.473544000 | -0.371944000 |
| N | 2.523281000  | -0.508802000 | -0.557083000 |
| C | 3.958654000  | -0.676646000 | -0.718476000 |
| C | 4.203522000  | -1.230374000 | -2.132748000 |
| H | 3.838071000  | -0.535728000 | -2.895454000 |
| H | 5.277927000  | -1.374094000 | -2.282210000 |
| H | 3.702020000  | -2.193110000 | -2.267748000 |
| C | 4.424347000  | -1.670273000 | 0.360202000  |
| H | 5.503451000  | -1.824508000 | 0.263266000  |
| H | 4.212307000  | -1.287832000 | 1.362429000  |
| H | 3.922060000  | -2.634832000 | 0.244457000  |
| C | 4.624175000  | 0.696667000  | -0.534042000 |
| H | 4.397484000  | 1.112309000  | 0.451795000  |
| H | 5.708758000  | 0.582798000  | -0.622473000 |
| H | 4.290765000  | 1.402385000  | -1.300656000 |
| C | -0.064791000 | 2.386541000  | -0.039132000 |
| C | -0.521026000 | 2.953764000  | 1.165179000  |
| C | 0.256850000  | 3.853935000  | 1.885241000  |
| C | 1.498389000  | 4.216425000  | 1.347151000  |
| C | 1.940800000  | 3.692623000  | 0.127094000  |
| C | 1.161615000  | 2.761782000  | -0.573857000 |
| C | -1.118149000 | 1.408156000  | -0.473659000 |
| C | -2.351148000 | 1.771153000  | 0.396432000  |
| H | -0.096027000 | 4.276910000  | 2.820713000  |
| H | 2.120952000  | 4.925829000  | 1.884237000  |
| H | 2.897639000  | 4.005507000  | -0.278786000 |
| H | 1.510961000  | 2.346532000  | -1.514281000 |
| N | -1.414701000 | 1.388364000  | -1.813900000 |
| N | -1.647149000 | 1.337617000  | -2.906046000 |
| O | -3.520578000 | 1.520092000  | 0.200366000  |
| N | -1.818771000 | 2.505840000  | 1.434079000  |
| H | -2.413486000 | 2.871607000  | 2.166969000  |

## 6. [TS1]

|                                              |                             |
|----------------------------------------------|-----------------------------|
| Zero-point correction=                       | 0.355559 (Hartree/Particle) |
| Thermal correction to Energy=                | 0.386180                    |
| Thermal correction to Enthalpy=              | 0.387124                    |
| Thermal correction to Gibbs Free Energy=     | 0.290050                    |
| Sum of electronic and zero-point Energies=   | -1382.646369                |
| Sum of electronic and thermal Energies=      | -1382.615748                |
| Sum of electronic and thermal Enthalpies=    | -1382.614804                |
| Sum of electronic and thermal Free Energies= | -1382.711878                |

|   |             |              |              |
|---|-------------|--------------|--------------|
| C | 2.060535000 | -1.574728000 | -0.212259000 |
| C | 1.535713000 | -2.869458000 | -0.376758000 |
| C | 2.025481000 | -3.736832000 | -1.346065000 |



|    |              |              |              |
|----|--------------|--------------|--------------|
| C  | 3.084803000  | -3.284095000 | -2.144173000 |
| C  | 3.622470000  | -2.002717000 | -1.977638000 |
| C  | 3.107215000  | -1.127971000 | -1.011592000 |
| C  | 1.231112000  | -0.910307000 | 0.850459000  |
| C  | 0.348419000  | -2.041735000 | 1.431478000  |
| H  | 1.611612000  | -4.732713000 | -1.471745000 |
| H  | 3.492508000  | -3.943482000 | -2.904667000 |
| H  | 4.440091000  | -1.674438000 | -2.611692000 |
| H  | 3.487440000  | -0.118670000 | -0.901769000 |
| N  | 1.909964000  | -0.276354000 | 1.870924000  |
| N  | 2.408271000  | 0.257770000  | 2.715263000  |
| O  | -0.334519000 | -2.014086000 | 2.438562000  |
| N  | 0.515557000  | -3.089664000 | 0.561346000  |
| Pd | 0.140018000  | 0.728868000  | -0.087676000 |
| O  | 1.965860000  | 1.684012000  | -0.188124000 |
| C  | 2.139467000  | 2.721473000  | 0.596073000  |
| O  | -0.598094000 | 2.286953000  | -1.182712000 |
| C  | -1.744069000 | 2.854219000  | -0.909987000 |
| O  | -2.564418000 | 2.473659000  | -0.071215000 |
| O  | 1.423401000  | 2.996698000  | 1.562838000  |
| C  | -1.982788000 | 4.110031000  | -1.740541000 |
| H  | -1.474209000 | 4.949737000  | -1.252576000 |
| H  | -1.572219000 | 4.009335000  | -2.748416000 |
| H  | -3.051555000 | 4.330554000  | -1.784576000 |
| C  | 3.326613000  | 3.587274000  | 0.206094000  |
| H  | 4.175375000  | 2.978624000  | -0.119685000 |
| H  | 3.033875000  | 4.221066000  | -0.639482000 |
| H  | 3.620262000  | 4.228341000  | 1.039879000  |
| C  | -1.582944000 | -0.181418000 | -0.067428000 |
| N  | -2.592710000 | -0.759390000 | -0.052488000 |
| C  | -3.925379000 | -1.334222000 | 0.007252000  |
| C  | -3.784199000 | -2.863304000 | -0.078319000 |
| H  | -3.207655000 | -3.249840000 | 0.767583000  |
| H  | -4.778510000 | -3.319193000 | -0.053436000 |
| H  | -3.291928000 | -3.159691000 | -1.010046000 |
| C  | -4.721175000 | -0.781527000 | -1.187658000 |
| H  | -5.734309000 | -1.194858000 | -1.165582000 |
| H  | -4.786668000 | 0.308533000  | -1.140097000 |
| H  | -4.251482000 | -1.064026000 | -2.134960000 |
| C  | -4.552936000 | -0.906990000 | 1.345666000  |
| H  | -4.625062000 | 0.181680000  | 1.411811000  |
| H  | -5.559202000 | -1.331110000 | 1.420644000  |
| H  | -3.957288000 | -1.269460000 | 2.188591000  |
| H  | 0.032642000  | -3.968911000 | 0.695591000  |

7. [III]

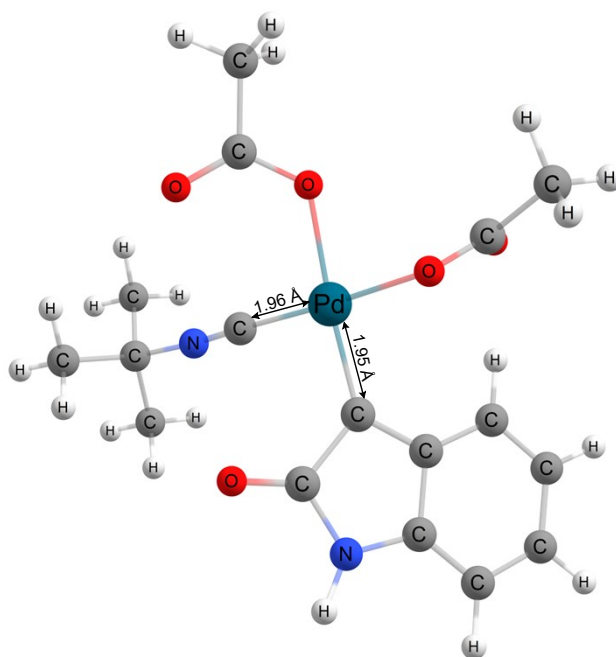

|                                              |                             |
|----------------------------------------------|-----------------------------|
| Zero-point correction=                       | 0.346140 (Hartree/Particle) |
| Thermal correction to Energy=                | 0.374650                    |
| Thermal correction to Enthalpy=              | 0.375594                    |
| Thermal correction to Gibbs Free Energy=     | 0.282888                    |
| Sum of electronic and zero-point Energies=   | -1273.158928                |
| Sum of electronic and thermal Energies=      | -1273.130418                |
| Sum of electronic and thermal Enthalpies=    | -1273.129474                |
| Sum of electronic and thermal Free Energies= | -1273.222180                |

|    |              |              |              |
|----|--------------|--------------|--------------|
| C  | -2.414642000 | -0.991584000 | 0.113873000  |
| C  | -2.959310000 | -2.207269000 | -0.439071000 |
| C  | -4.213770000 | -2.671997000 | -0.071574000 |
| C  | -4.923868000 | -1.912072000 | 0.867544000  |
| C  | -4.415037000 | -0.723002000 | 1.436278000  |
| C  | -3.167376000 | -0.251949000 | 1.067212000  |
| C  | -1.139914000 | -0.761363000 | -0.420677000 |
| C  | -0.896152000 | -1.964970000 | -1.361342000 |
| H  | -4.632137000 | -3.582876000 | -0.486990000 |
| H  | -5.909275000 | -2.256392000 | 1.170654000  |
| H  | -5.012305000 | -0.180416000 | 2.161303000  |
| H  | -2.748170000 | 0.665031000  | 1.476484000  |
| O  | 0.090482000  | -2.207984000 | -2.024689000 |
| N  | -2.046662000 | -2.752099000 | -1.317513000 |
| Pd | 0.107225000  | 0.714557000  | -0.182565000 |
| O  | -1.354586000 | 2.075901000  | -0.697195000 |
| C  | -1.875596000 | 2.831247000  | 0.227197000  |
| O  | 1.314611000  | 2.367197000  | 0.109120000  |
| C  | 2.538028000  | 2.460716000  | -0.330337000 |

|   |              |              |              |
|---|--------------|--------------|--------------|
| O | 3.163904000  | 1.574576000  | -0.926443000 |
| O | -1.845703000 | 2.601785000  | 1.445331000  |
| C | 3.168065000  | 3.820294000  | -0.051561000 |
| H | 2.633943000  | 4.591658000  | -0.617718000 |
| H | 3.073477000  | 4.073807000  | 1.009235000  |
| H | 4.219967000  | 3.822790000  | -0.343941000 |
| C | -2.557126000 | 4.077323000  | -0.319339000 |
| H | -1.791274000 | 4.843938000  | -0.487843000 |
| H | -3.042171000 | 3.878106000  | -1.278871000 |
| H | -3.281919000 | 4.463843000  | 0.400757000  |
| C | 1.582206000  | -0.529178000 | 0.165648000  |
| N | 2.419421000  | -1.289510000 | 0.434168000  |
| C | 3.550838000  | -2.164480000 | 0.682846000  |
| C | 2.999173000  | -3.504713000 | 1.198026000  |
| H | 2.342770000  | -3.968306000 | 0.455201000  |
| H | 3.831795000  | -4.186341000 | 1.396645000  |
| H | 2.437424000  | -3.365843000 | 2.127127000  |
| C | 4.439719000  | -1.485445000 | 1.738937000  |
| H | 5.300260000  | -2.127899000 | 1.949940000  |
| H | 4.804760000  | -0.520241000 | 1.377928000  |
| H | 3.888925000  | -1.326073000 | 2.671054000  |
| C | 4.300095000  | -2.341914000 | -0.649211000 |
| H | 4.653940000  | -1.379282000 | -1.027153000 |
| H | 5.162291000  | -2.997144000 | -0.489714000 |
| H | 3.651085000  | -2.794956000 | -1.404333000 |
| H | -2.166708000 | -3.601442000 | -1.854038000 |

## 8. [TS2]

|                                              |                             |
|----------------------------------------------|-----------------------------|
| Zero-point correction=                       | 0.343794 (Hartree/Particle) |
| Thermal correction to Energy=                | 0.372249                    |
| Thermal correction to Enthalpy=              | 0.373193                    |
| Thermal correction to Gibbs Free Energy=     | 0.280084                    |
| Sum of electronic and zero-point Energies=   | -1273.116842                |
| Sum of electronic and thermal Energies=      | -1273.088387                |
| Sum of electronic and thermal Enthalpies=    | -1273.087442                |
| Sum of electronic and thermal Free Energies= | -1273.180552                |

|   |              |              |              |
|---|--------------|--------------|--------------|
| C | -2.215799000 | 0.238385000  | -0.240526000 |
| C | -3.348186000 | 0.636793000  | 0.537157000  |
| C | -4.613063000 | 0.749393000  | -0.025032000 |
| C | -4.735075000 | 0.463844000  | -1.391153000 |
| C | -3.634293000 | 0.068255000  | -2.178641000 |
| C | -2.372750000 | -0.053615000 | -1.612072000 |
| C | -1.082759000 | 0.163683000  | 0.623253000  |
| C | -1.585674000 | 0.627186000  | 1.992499000  |
| H | -5.475537000 | 1.041047000  | 0.565674000  |
| H | -5.713958000 | 0.544364000  | -1.855398000 |
| H | -3.781789000 | -0.153767000 | -3.230429000 |
| H | -1.518174000 | -0.385880000 | -2.191334000 |

|    |              |              |              |
|----|--------------|--------------|--------------|
| O  | -0.940039000 | 0.772702000  | 3.014629000  |
| N  | -2.947766000 | 0.848369000  | 1.849295000  |
| Pd | 0.603853000  | -0.897467000 | 0.452045000  |
| O  | -0.005156000 | -3.010464000 | 0.798415000  |
| C  | -0.243937000 | -3.295263000 | -0.419357000 |
| O  | 2.579445000  | -1.542956000 | 0.318727000  |
| C  | 3.498268000  | -0.787581000 | -0.199556000 |
| O  | 3.316505000  | 0.349931000  | -0.666581000 |
| O  | -0.150739000 | -2.438618000 | -1.346290000 |
| C  | 4.879330000  | -1.429014000 | -0.225440000 |
| H  | 4.915298000  | -2.161257000 | -1.040931000 |
| H  | 5.649639000  | -0.674193000 | -0.398664000 |
| H  | 5.079000000  | -1.965963000 | 0.706401000  |
| C  | -0.621275000 | -4.724582000 | -0.764720000 |
| H  | -1.156338000 | -5.193678000 | 0.064330000  |
| H  | -1.221514000 | -4.761248000 | -1.676415000 |
| H  | 0.301692000  | -5.290335000 | -0.938110000 |
| C  | 0.446281000  | 1.012353000  | 0.142829000  |
| N  | 0.698868000  | 2.135751000  | -0.099935000 |
| C  | 1.328542000  | 3.382469000  | -0.497522000 |
| C  | 0.277976000  | 4.500243000  | -0.365090000 |
| H  | -0.074414000 | 4.588769000  | 0.667196000  |
| H  | 0.732044000  | 5.451501000  | -0.658101000 |
| H  | -0.580797000 | 4.312647000  | -1.017160000 |
| C  | 1.801144000  | 3.216445000  | -1.952800000 |
| H  | 2.296325000  | 4.139431000  | -2.270617000 |
| H  | 2.506891000  | 2.385915000  | -2.028834000 |
| H  | 0.954298000  | 3.030696000  | -2.620958000 |
| C  | 2.516995000  | 3.610750000  | 0.455306000  |
| H  | 3.233455000  | 2.790425000  | 0.368179000  |
| H  | 3.010405000  | 4.549249000  | 0.183425000  |
| H  | 2.178339000  | 3.683582000  | 1.493276000  |
| H  | -3.544264000 | 1.140093000  | 2.612864000  |

## 9. [IV]

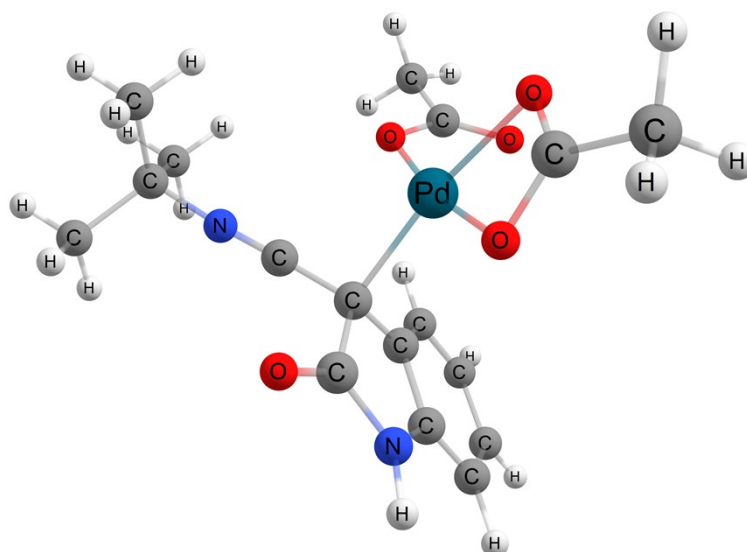

|                                              |                             |
|----------------------------------------------|-----------------------------|
| Zero-point correction=                       | 0.347741 (Hartree/Particle) |
| Thermal correction to Energy=                | 0.374908                    |
| Thermal correction to Enthalpy=              | 0.375852                    |
| Thermal correction to Gibbs Free Energy=     | 0.286384                    |
| Sum of electronic and zero-point Energies=   | -1273.191433                |
| Sum of electronic and thermal Energies =     | -1273.164266                |
| Sum of electronic and thermal Enthalpies=    | -1273.163322                |
| Sum of electronic and thermal Free Energies= | -1273.252790                |

|    |              |              |              |
|----|--------------|--------------|--------------|
| C  | -0.364353000 | -1.999809000 | 0.217926000  |
| C  | -1.242118000 | -2.761029000 | -0.579915000 |
| C  | -1.925362000 | -3.861006000 | -0.073714000 |
| C  | -1.696063000 | -4.209739000 | 1.264562000  |
| C  | -0.810419000 | -3.475607000 | 2.061157000  |
| C  | -0.140307000 | -2.358883000 | 1.542915000  |
| C  | 0.129954000  | -0.869004000 | -0.632722000 |
| C  | -0.386624000 | -1.187902000 | -2.043756000 |
| H  | -2.605970000 | -4.435373000 | -0.695131000 |
| H  | -2.216485000 | -5.064818000 | 1.686129000  |
| H  | -0.650943000 | -3.761583000 | 3.096249000  |
| H  | 0.522708000  | -1.774577000 | 2.171954000  |
| O  | -0.084954000 | -0.649124000 | -3.097832000 |
| N  | -1.258572000 | -2.239562000 | -1.879182000 |
| Pd | -0.812702000 | 0.948450000  | -0.004832000 |
| O  | -0.974452000 | 0.923388000  | 3.045355000  |
| C  | 0.179179000  | 1.155826000  | 2.686508000  |
| O  | -2.113101000 | 2.681773000  | 0.147960000  |
| C  | -2.756050000 | 2.239992000  | -0.856495000 |
| O  | -2.346372000 | 1.148646000  | -1.400723000 |
| O  | 0.607514000  | 1.127184000  | 1.442872000  |
| C  | -3.972662000 | 2.938999000  | -1.381723000 |
| H  | -3.886338000 | 4.017312000  | -1.227652000 |
| H  | -4.118771000 | 2.714031000  | -2.440708000 |
| H  | -4.849672000 | 2.584394000  | -0.827064000 |
| C  | 1.273948000  | 1.522962000  | 3.679603000  |
| H  | 0.894884000  | 1.446859000  | 4.700428000  |
| H  | 2.142680000  | 0.866818000  | 3.560482000  |
| H  | 1.609646000  | 2.549528000  | 3.495133000  |
| C  | 1.488613000  | -0.498980000 | -0.625028000 |
| N  | 2.604341000  | -0.190602000 | -0.678905000 |
| C  | 3.967678000  | 0.318954000  | -0.749724000 |
| C  | 4.697784000  | -0.480045000 | -1.842288000 |
| H  | 4.209061000  | -0.353356000 | -2.812670000 |
| H  | 5.726013000  | -0.115078000 | -1.921524000 |
| H  | 4.725904000  | -1.546104000 | -1.597852000 |
| C  | 4.607417000  | 0.099031000  | 0.631201000  |
| H  | 5.637857000  | 0.464940000  | 0.602006000  |
| H  | 4.065226000  | 0.647110000  | 1.405996000  |
| H  | 4.624804000  | -0.963264000 | 0.892479000  |

|   |              |              |              |
|---|--------------|--------------|--------------|
| C | 3.882300000  | 1.813310000  | -1.103770000 |
| H | 3.334475000  | 2.367509000  | -0.337218000 |
| H | 4.896918000  | 2.217388000  | -1.171396000 |
| H | 3.385391000  | 1.959418000  | -2.067157000 |
| H | -1.790041000 | -2.616067000 | -2.653082000 |

10. [V]

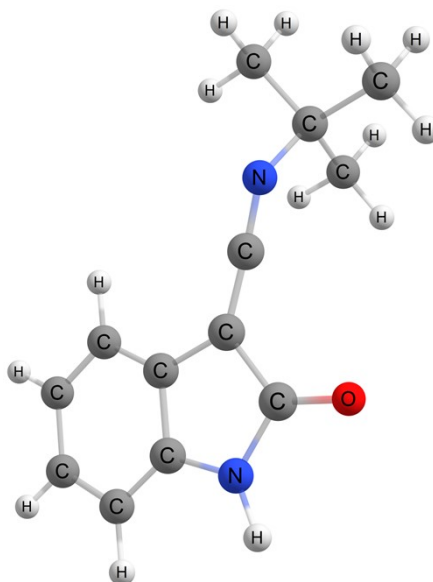

|                                              |                             |
|----------------------------------------------|-----------------------------|
| Zero-point correction=                       | 0.244172 (Hartree/Particle) |
| Thermal correction to Energy=                | 0.259043                    |
| Thermal correction to Enthalpy=              | 0.259987                    |
| Thermal correction to Gibbs Free Energy=     | 0.201721                    |
| Sum of electronic and zero-point Energies=   | -688.355566                 |
| Sum of electronic and thermal Energies=      | -688.340695                 |
| Sum of electronic and thermal Enthalpies=    | -688.339751                 |
| Sum of electronic and thermal Free Energies= | -688.398017                 |

|   |              |              |              |
|---|--------------|--------------|--------------|
| C | 1.516460000  | -0.347970000 | 0.135455000  |
| C | 2.616073000  | 0.519519000  | -0.066469000 |
| C | 3.913087000  | 0.037670000  | -0.203670000 |
| C | 4.106960000  | -1.349283000 | -0.135864000 |
| C | 3.028915000  | -2.219706000 | 0.064876000  |
| C | 1.724990000  | -1.724438000 | 0.202061000  |
| C | 0.331456000  | 0.505695000  | 0.237357000  |
| C | 0.775291000  | 1.917596000  | 0.082479000  |
| H | 4.749581000  | 0.713146000  | -0.357323000 |
| H | 5.110897000  | -1.750304000 | -0.240076000 |
| H | 3.203315000  | -3.290332000 | 0.115591000  |
| H | 0.892731000  | -2.404699000 | 0.359679000  |
| O | 0.119626000  | 2.956902000  | 0.093865000  |
| N | 2.151448000  | 1.835808000  | -0.092013000 |
| C | -0.948301000 | 0.165506000  | 0.431684000  |
| N | -2.080526000 | -0.115502000 | 0.722940000  |
| C | -3.298047000 | -0.419310000 | -0.079212000 |

|   |              |              |              |
|---|--------------|--------------|--------------|
| C | -4.324953000 | 0.665162000  | 0.280186000  |
| H | -3.966375000 | 1.656406000  | -0.013758000 |
| H | -5.265844000 | 0.467640000  | -0.243585000 |
| H | -4.521310000 | 0.674184000  | 1.356495000  |
| C | -3.783158000 | -1.802239000 | 0.379184000  |
| H | -4.712615000 | -2.057491000 | -0.139668000 |
| H | -3.041157000 | -2.574813000 | 0.152615000  |
| H | -3.973239000 | -1.810833000 | 1.456694000  |
| C | -2.980365000 | -0.407892000 | -1.579613000 |
| H | -2.228691000 | -1.163526000 | -1.831200000 |
| H | -3.886947000 | -0.628324000 | -2.152464000 |
| H | -2.607790000 | 0.571534000  | -1.896414000 |
| H | 2.723536000  | 2.658187000  | -0.224723000 |

## 11. [TS3]

|                                              |                             |
|----------------------------------------------|-----------------------------|
| Zero-point correction=                       | 0.266622 (Hartree/Particle) |
| Thermal correction to Energy=                | 0.282597                    |
| Thermal correction to Enthalpy=              | 0.283542                    |
| Thermal correction to Gibbs Free Energy=     | 0.224086                    |
| Sum of electronic and zero-point Energies=   | -764.705025                 |
| Sum of electronic and thermal Energies=      | -764.689049                 |
| Sum of electronic and thermal Enthalpies=    | -764.688105                 |
| Sum of electronic and thermal Free Energies= | -764.747560                 |

|   |              |              |              |
|---|--------------|--------------|--------------|
| C | 1.715172000  | -0.318932000 | -0.014396000 |
| C | 2.475410000  | 0.879762000  | 0.012245000  |
| C | 3.854439000  | 0.882281000  | 0.190446000  |
| C | 4.499612000  | -0.351722000 | 0.350389000  |
| C | 3.768917000  | -1.545593000 | 0.340131000  |
| C | 2.378234000  | -1.538222000 | 0.163963000  |
| C | 0.320042000  | 0.074934000  | -0.206118000 |
| C | 0.281144000  | 1.542720000  | -0.290869000 |
| H | 4.414345000  | 1.813079000  | 0.207374000  |
| H | 5.576408000  | -0.376886000 | 0.490082000  |
| H | 4.282743000  | -2.492638000 | 0.478133000  |
| H | 1.828681000  | -2.473733000 | 0.183202000  |
| O | -0.663409000 | 2.320770000  | -0.472690000 |
| N | 1.606223000  | 1.951994000  | -0.154502000 |
| C | -0.785031000 | -0.734565000 | -0.377667000 |
| N | -2.064803000 | -0.874072000 | -0.383257000 |
| C | -3.149602000 | -0.103965000 | 0.263754000  |
| C | -2.670261000 | 0.565041000  | 1.561709000  |
| H | -1.928067000 | 1.339505000  | 1.358297000  |
| H | -3.521861000 | 1.037324000  | 2.063378000  |
| H | -2.241837000 | -0.173458000 | 2.248588000  |
| C | -4.249203000 | -1.133900000 | 0.578580000  |
| H | -5.117957000 | -0.636158000 | 1.021496000  |
| H | -4.576183000 | -1.645226000 | -0.333403000 |
| H | -3.889157000 | -1.888737000 | 1.286468000  |

|   |              |              |              |
|---|--------------|--------------|--------------|
| C | -3.680554000 | 0.941533000  | -0.734080000 |
| H | -4.013948000 | 0.455920000  | -1.658041000 |
| H | -4.536328000 | 1.470832000  | -0.299671000 |
| H | -2.901237000 | 1.668372000  | -0.973734000 |
| H | 1.869838000  | 2.926605000  | -0.188644000 |
| O | -0.460707000 | -2.212611000 | -0.846517000 |
| H | -0.002662000 | -2.232649000 | -1.711659000 |
| H | -1.589705000 | -2.159102000 | -0.882422000 |

## 12. [VI]

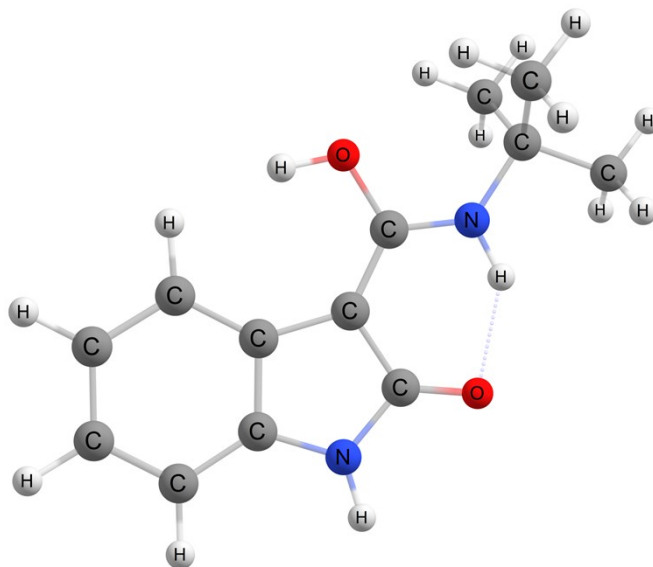

|                                              |                             |
|----------------------------------------------|-----------------------------|
| Zero-point correction=                       | 0.273171 (Hartree/Particle) |
| Thermal correction to Energy=                | 0.289313                    |
| Thermal correction to Enthalpy=              | 0.290257                    |
| Thermal correction to Gibbs Free Energy=     | 0.228706                    |
| Sum of electronic and zero-point Energies=   | -764.804465                 |
| Sum of electronic and thermal Energies=      | -764.788323                 |
| Sum of electronic and thermal Enthalpies=    | -764.787379                 |
| Sum of electronic and thermal Free Energies= | -764.848930                 |

|   |              |              |              |
|---|--------------|--------------|--------------|
| C | -1.808196000 | -0.341175000 | -0.000930000 |
| C | -2.695773000 | 0.773264000  | 0.000841000  |
| C | -4.078078000 | 0.630727000  | 0.001879000  |
| C | -4.608778000 | -0.666067000 | 0.001000000  |
| C | -3.762357000 | -1.780011000 | -0.001125000 |
| C | -2.369592000 | -1.625921000 | -0.002253000 |
| C | -0.460422000 | 0.209885000  | -0.001528000 |
| C | -0.577747000 | 1.659920000  | -0.000947000 |
| H | -4.727963000 | 1.501348000  | 0.003258000  |
| H | -5.685807000 | -0.804425000 | 0.001781000  |
| H | -4.185799000 | -2.780022000 | -0.002177000 |
| H | -1.763842000 | -2.530757000 | -0.004825000 |
| O | 0.322500000  | 2.526561000  | -0.001673000 |
| N | -1.936073000 | 1.939202000  | 0.000934000  |
| C | 0.791151000  | -0.413735000 | -0.001181000 |



|   |              |              |              |
|---|--------------|--------------|--------------|
| N | 1.928693000  | 0.286133000  | -0.003540000 |
| C | 3.337176000  | -0.190366000 | 0.000294000  |
| C | 3.630480000  | -1.005288000 | 1.273557000  |
| H | 3.046494000  | -1.927919000 | 1.306292000  |
| H | 4.691913000  | -1.274157000 | 1.304012000  |
| H | 3.401315000  | -0.417581000 | 2.168745000  |
| C | 4.195102000  | 1.085472000  | -0.003874000 |
| H | 5.256477000  | 0.821507000  | -0.001345000 |
| H | 3.998181000  | 1.691620000  | -0.895090000 |
| H | 3.995834000  | 1.699047000  | 0.881731000  |
| C | 3.634071000  | -1.015846000 | -1.265291000 |
| H | 3.406679000  | -0.435881000 | -2.165967000 |
| H | 4.695778000  | -1.284114000 | -1.290873000 |
| H | 3.050829000  | -1.939130000 | -1.291712000 |
| H | -2.299715000 | 2.881601000  | 0.001592000  |
| O | 0.927231000  | -1.754902000 | 0.001346000  |
| H | 0.055583000  | -2.174329000 | 0.007440000  |
| H | 1.755633000  | 1.297411000  | -0.004651000 |

### 13. [TS4]

|                                              |                             |
|----------------------------------------------|-----------------------------|
| Zero-point correction=                       | 0.268028 (Hartree/Particle) |
| Thermal correction to Energy=                | 0.283972                    |
| Thermal correction to Enthalpy=              | 0.284916                    |
| Thermal correction to Gibbs Free Energy=     | 0.224175                    |
| Sum of electronic and zero-point Energies=   | -764.741930                 |
| Sum of electronic and thermal Energies=      | -764.725986                 |
| Sum of electronic and thermal Enthalpies=    | -764.725042                 |
| Sum of electronic and thermal Free Energies= | -764.785783                 |

|   |              |              |              |
|---|--------------|--------------|--------------|
| C | 1.605657000  | -0.308937000 | 0.251571000  |
| C | 2.710995000  | 0.433628000  | -0.234045000 |
| C | 3.943047000  | -0.159885000 | -0.489008000 |
| C | 4.063239000  | -1.540427000 | -0.271829000 |
| C | 2.977833000  | -2.293225000 | 0.191492000  |
| C | 1.745213000  | -1.681092000 | 0.462671000  |
| C | 0.515848000  | 0.649435000  | 0.489150000  |
| C | 0.964520000  | 1.943216000  | -0.084247000 |
| H | 4.783930000  | 0.423613000  | -0.853066000 |
| H | 5.013376000  | -2.028733000 | -0.468417000 |
| H | 3.092312000  | -3.361496000 | 0.351182000  |
| H | 0.913558000  | -2.271219000 | 0.839233000  |
| O | 0.341433000  | 2.992096000  | -0.263201000 |
| N | 2.314096000  | 1.761403000  | -0.386651000 |
| C | -0.927822000 | 0.340851000  | 0.553127000  |
| N | -1.682281000 | -0.186201000 | -0.390271000 |
| C | -3.142929000 | -0.519321000 | -0.332760000 |
| C | -3.396332000 | -1.526214000 | 0.800147000  |
| H | -3.149210000 | -1.102234000 | 1.776171000  |

|   |              |              |              |
|---|--------------|--------------|--------------|
| H | -4.454977000 | -1.804654000 | 0.808976000  |
| H | -2.805553000 | -2.436598000 | 0.653256000  |
| C | -3.478001000 | -1.149313000 | -1.691499000 |
| H | -4.538173000 | -1.414645000 | -1.725013000 |
| H | -3.282269000 | -0.450332000 | -2.513025000 |
| H | -2.897105000 | -2.063140000 | -1.861549000 |
| C | -3.950848000 | 0.771632000  | -0.125035000 |
| H | -3.750811000 | 1.489881000  | -0.926701000 |
| H | -5.020884000 | 0.539522000  | -0.130129000 |
| H | -3.707872000 | 1.244076000  | 0.829793000  |
| H | 2.881980000  | 2.505259000  | -0.768358000 |
| O | -1.336376000 | 0.677718000  | 1.732878000  |
| H | -0.110089000 | 0.932839000  | 1.824386000  |
| H | -1.213899000 | -0.349165000 | -1.274119000 |

#### 14. [4]

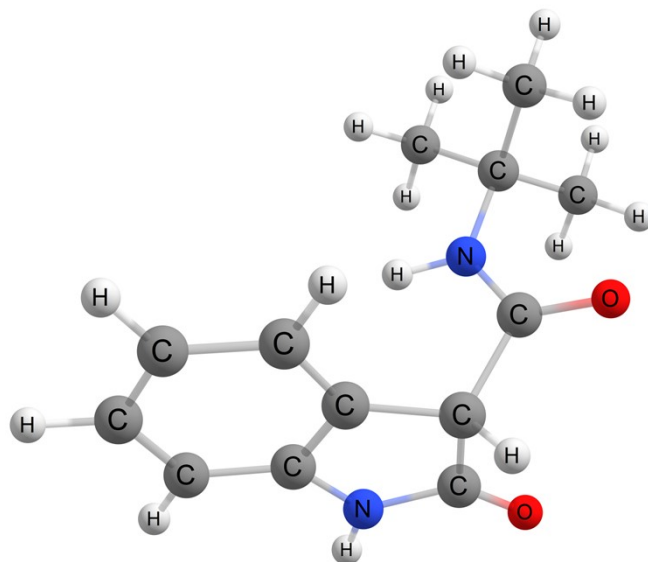

|                                              |                             |
|----------------------------------------------|-----------------------------|
| Zero-point correction=                       | 0.272821 (Hartree/Particle) |
| Thermal correction to Energy=                | 0.289001                    |
| Thermal correction to Enthalpy=              | 0.289945                    |
| Thermal correction to Gibbs Free Energy=     | 0.228356                    |
| Sum of electronic and zero-point Energies=   | -764.812423                 |
| Sum of electronic and thermal Energies=      | -764.796243                 |
| Sum of electronic and thermal Enthalpies=    | -764.795299                 |
| Sum of electronic and thermal Free Energies= | -764.856889                 |

|   |              |              |              |
|---|--------------|--------------|--------------|
| C | -1.532114000 | -0.091387000 | -0.600799000 |
| C | -2.326708000 | 0.344651000  | 0.474143000  |
| C | -3.361730000 | -0.429572000 | 0.989222000  |
| C | -3.593600000 | -1.678200000 | 0.395699000  |
| C | -2.814518000 | -2.127293000 | -0.675532000 |
| C | -1.775518000 | -1.330538000 | -1.181063000 |
| C | -0.518252000 | 0.984146000  | -0.925874000 |
| C | -0.840139000 | 2.084151000  | 0.120314000  |
| H | -3.971419000 | -0.081331000 | 1.817467000  |

|   |              |              |              |
|---|--------------|--------------|--------------|
| H | -4.395688000 | -2.303870000 | 0.776385000  |
| H | -3.015412000 | -3.096733000 | -1.120984000 |
| H | -1.171438000 | -1.678395000 | -2.014579000 |
| O | -0.288467000 | 3.161615000  | 0.264565000  |
| N | -1.895827000 | 1.615975000  | 0.876763000  |
| C | 0.977730000  | 0.584615000  | -0.893055000 |
| N | 1.333991000  | -0.204681000 | 0.150897000  |
| C | 2.696001000  | -0.717920000 | 0.453640000  |
| C | 3.187742000  | -1.620004000 | -0.692563000 |
| H | 3.267552000  | -1.058128000 | -1.625949000 |
| H | 4.174989000  | -2.028813000 | -0.450634000 |
| H | 2.500204000  | -2.459107000 | -0.847541000 |
| C | 2.560998000  | -1.538789000 | 1.745517000  |
| H | 3.532613000  | -1.953598000 | 2.029359000  |
| H | 2.205946000  | -0.916546000 | 2.575389000  |
| H | 1.865038000  | -2.376253000 | 1.614436000  |
| C | 3.662295000  | 0.457831000  | 0.678366000  |
| H | 3.306791000  | 1.101095000  | 1.490474000  |
| H | 4.653442000  | 0.078228000  | 0.949995000  |
| H | 3.759967000  | 1.064952000  | -0.224077000 |
| H | -2.305696000 | 2.163508000  | 1.622474000  |
| O | 1.748904000  | 0.995338000  | -1.757475000 |
| H | -0.678127000 | 1.415438000  | -1.918944000 |
| H | 0.587467000  | -0.535281000 | 0.748292000  |

### 15. [VII]

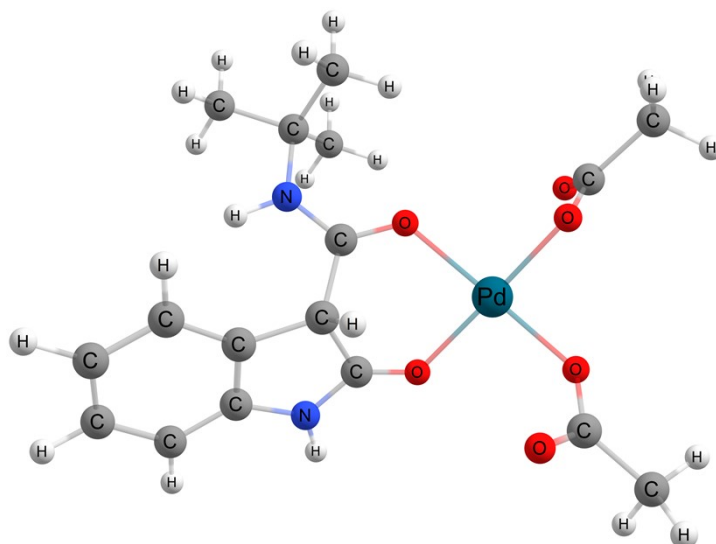

|                                            |                             |
|--------------------------------------------|-----------------------------|
| Zero-point correction=                     | 0.378225 (Hartree/Particle) |
| Thermal correction to Energy=              | 0.406616                    |
| Thermal correction to Enthalpy=            | 0.407560                    |
| Thermal correction to Gibbs Free Energy=   | 0.315617                    |
| Sum of electronic and zero-point Energies= | -1349.650414                |
| Sum of electronic and thermal Energies=    | -1349.622022                |
| Sum of electronic and thermal Enthalpies=  | -1349.621078                |

Sum of electronic and thermal Free Energies=

-1349.713022

|    |              |              |              |
|----|--------------|--------------|--------------|
| C  | 2.887213000  | -1.039655000 | -0.517760000 |
| C  | 3.114795000  | -2.014754000 | 0.467922000  |
| C  | 4.344259000  | -2.638873000 | 0.629962000  |
| C  | 5.375265000  | -2.262054000 | -0.242402000 |
| C  | 5.165758000  | -1.307837000 | -1.242845000 |
| C  | 3.912098000  | -0.694262000 | -1.392959000 |
| C  | 1.441441000  | -0.605768000 | -0.431536000 |
| C  | 0.902336000  | -1.478651000 | 0.713083000  |
| H  | 4.501398000  | -3.394200000 | 1.393618000  |
| H  | 6.349599000  | -2.730779000 | -0.142397000 |
| H  | 5.975018000  | -1.046429000 | -1.917292000 |
| H  | 3.747408000  | 0.026474000  | -2.189578000 |
| O  | -0.255854000 | -1.490651000 | 1.155545000  |
| N  | 1.920070000  | -2.234710000 | 1.183188000  |
| Pd | -1.654225000 | -0.238202000 | 0.166489000  |
| O  | -2.050259000 | -2.932314000 | -1.134499000 |
| C  | -2.979134000 | -2.690110000 | -0.355047000 |
| O  | -3.399571000 | 2.092038000  | 1.038587000  |
| C  | -3.548419000 | 1.860296000  | -0.163198000 |
| O  | -2.915695000 | 0.940074000  | -0.849398000 |
| O  | -3.112724000 | -1.601625000 | 0.356883000  |
| C  | -4.550776000 | 2.634443000  | -1.009047000 |
| H  | -4.207157000 | 2.747514000  | -2.040625000 |
| H  | -5.494557000 | 2.076576000  | -1.029369000 |
| H  | -4.738213000 | 3.613337000  | -0.561811000 |
| C  | -4.093596000 | -3.698038000 | -0.110797000 |
| H  | -4.225265000 | -4.326216000 | -0.994961000 |
| H  | -3.807988000 | -4.342219000 | 0.729662000  |
| H  | -5.033691000 | -3.204398000 | 0.147072000  |
| C  | 1.094097000  | 0.867001000  | -0.139953000 |
| N  | 2.091812000  | 1.748052000  | -0.088816000 |
| C  | 1.988799000  | 3.216556000  | 0.190821000  |
| C  | 1.134757000  | 3.893898000  | -0.893353000 |
| H  | 0.106388000  | 3.527107000  | -0.879939000 |
| H  | 1.113414000  | 4.974132000  | -0.716489000 |
| H  | 1.557653000  | 3.720139000  | -1.888972000 |
| C  | 3.430158000  | 3.744737000  | 0.138970000  |
| H  | 3.436198000  | 4.819910000  | 0.337917000  |
| H  | 4.060844000  | 3.261964000  | 0.894939000  |
| H  | 3.879790000  | 3.585333000  | -0.848224000 |
| C  | 1.390232000  | 3.437734000  | 1.590078000  |
| H  | 1.994239000  | 2.938409000  | 2.355767000  |
| H  | 1.375967000  | 4.509244000  | 1.814474000  |
| H  | 0.365566000  | 3.065195000  | 1.652623000  |
| H  | 1.795419000  | -2.919378000 | 1.919931000  |
| O  | -0.102912000 | 1.193318000  | 0.033539000  |
| H  | 0.874059000  | -0.869987000 | -1.335573000 |
| H  | 3.025523000  | 1.377458000  | -0.216748000 |

## 16. [TS-5]

|                                              |                             |
|----------------------------------------------|-----------------------------|
| Zero-point correction=                       | 0.372934 (Hartree/Particle) |
| Thermal correction to Energy=                | 0.400691                    |
| Thermal correction to Enthalpy=              | 0.401636                    |
| Thermal correction to Gibbs Free Energy=     | 0.312470                    |
| Sum of electronic and zero-point Energies=   | -1349.627904                |
| Sum of electronic and thermal Energies=      | -1349.600146                |
| Sum of electronic and thermal Enthalpies=    | -1349.599202                |
| Sum of electronic and thermal Free Energies= | -1349.688368                |

|    |              |              |              |
|----|--------------|--------------|--------------|
| C  | -2.737928000 | -0.350462000 | 0.182539000  |
| C  | -3.277022000 | -1.212033000 | -0.798265000 |
| C  | -4.615893000 | -1.581626000 | -0.827378000 |
| C  | -5.450110000 | -1.062086000 | 0.171151000  |
| C  | -4.940402000 | -0.218228000 | 1.164578000  |
| C  | -3.583142000 | 0.134277000  | 1.183358000  |
| C  | -1.271877000 | -0.231050000 | -0.070063000 |
| C  | -1.056356000 | -1.072470000 | -1.265696000 |
| H  | -5.001948000 | -2.250183000 | -1.591244000 |
| H  | -6.502722000 | -1.328767000 | 0.177325000  |
| H  | -5.600207000 | 0.157351000  | 1.941044000  |
| H  | -3.197691000 | 0.751896000  | 1.990466000  |
| O  | 0.054294000  | -1.349046000 | -1.800284000 |
| N  | -2.237765000 | -1.611564000 | -1.656993000 |
| Pd | 1.596779000  | -0.671295000 | -0.577703000 |
| O  | -0.096063000 | -2.021065000 | 1.512344000  |
| C  | 0.893678000  | -2.785003000 | 1.201415000  |
| O  | 4.139748000  | 0.642693000  | -1.179061000 |
| C  | 4.039960000  | 0.531540000  | 0.045437000  |
| O  | 3.016060000  | -0.015226000 | 0.659254000  |
| O  | 1.756843000  | -2.573853000 | 0.299972000  |
| C  | 5.132115000  | 0.992525000  | 0.994384000  |
| H  | 4.720623000  | 1.334291000  | 1.947565000  |
| H  | 5.799860000  | 0.147054000  | 1.198746000  |
| H  | 5.717306000  | 1.787517000  | 0.526713000  |
| C  | 1.025832000  | -4.050041000 | 2.014811000  |
| H  | 0.096640000  | -4.625229000 | 1.955731000  |
| H  | 1.863765000  | -4.653558000 | 1.664520000  |
| H  | 1.180322000  | -3.781920000 | 3.065375000  |
| C  | -0.571965000 | 1.094915000  | -0.152093000 |
| N  | -1.231814000 | 2.184109000  | 0.267507000  |
| C  | -0.738101000 | 3.592926000  | 0.295701000  |
| C  | 0.513982000  | 3.696420000  | 1.182616000  |
| H  | 1.345599000  | 3.123041000  | 0.769146000  |
| H  | 0.822783000  | 4.744556000  | 1.257419000  |
| H  | 0.305871000  | 3.328595000  | 2.193264000  |
| C  | -1.882396000 | 4.415253000  | 0.909159000  |
| H  | -1.596700000 | 5.469696000  | 0.960174000  |

|   |              |              |              |
|---|--------------|--------------|--------------|
| H | -2.794101000 | 4.345921000  | 0.303464000  |
| H | -2.112239000 | 4.080085000  | 1.927335000  |
| C | -0.447107000 | 4.081479000  | -1.134230000 |
| H | -1.341605000 | 4.000668000  | -1.762017000 |
| H | -0.141848000 | 5.133150000  | -1.110760000 |
| H | 0.356163000  | 3.502493000  | -1.595016000 |
| H | -2.312873000 | -2.308760000 | -2.387481000 |
| O | 0.602835000  | 1.205017000  | -0.620538000 |
| H | -0.555694000 | -1.102282000 | 0.804808000  |
| H | -2.205428000 | 2.049972000  | 0.506128000  |

### 17. [VII]

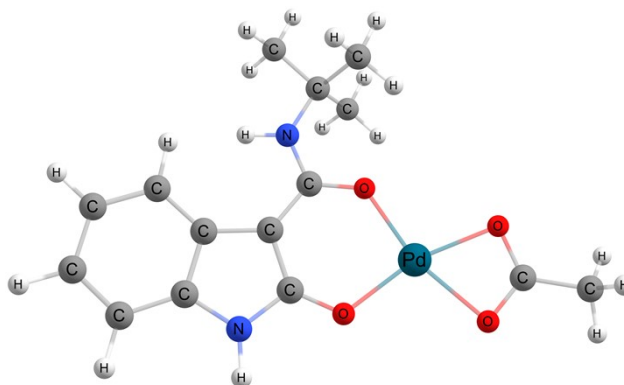

|                                              |                             |
|----------------------------------------------|-----------------------------|
| Zero-point correction=                       | 0.315147 (Hartree/Particle) |
| Thermal correction to Energy=                | 0.337559                    |
| Thermal correction to Enthalpy=              | 0.338503                    |
| Thermal correction to Gibbs Free Energy=     | 0.261744                    |
| Sum of electronic and zero-point Energies=   | -1120.617402                |
| Sum of electronic and thermal Energies=      | -1120.594990                |
| Sum of electronic and thermal Enthalpies=    | -1120.594046                |
| Sum of electronic and thermal Free Energies= | -1120.670805                |

|    |              |              |              |
|----|--------------|--------------|--------------|
| C  | 2.834479000  | -0.716441000 | -0.066132000 |
| C  | 2.968147000  | -2.127507000 | 0.063606000  |
| C  | 4.193078000  | -2.785161000 | 0.025818000  |
| C  | 5.343434000  | -2.011279000 | -0.159148000 |
| C  | 5.246114000  | -0.621349000 | -0.311646000 |
| C  | 4.007525000  | 0.029096000  | -0.271625000 |
| C  | 1.406974000  | -0.422817000 | 0.023288000  |
| C  | 0.746777000  | -1.671734000 | 0.177508000  |
| H  | 4.251669000  | -3.864928000 | 0.131229000  |
| H  | 6.315689000  | -2.493788000 | -0.193756000 |
| H  | 6.146405000  | -0.034887000 | -0.471700000 |
| H  | 3.988597000  | 1.102744000  | -0.431307000 |
| O  | -0.497657000 | -1.988480000 | 0.292478000  |
| N  | 1.693793000  | -2.663697000 | 0.209186000  |
| Pd | -1.914044000 | -0.590413000 | 0.037012000  |
| O  | -3.661845000 | -1.729483000 | 0.033942000  |
| C  | -4.359138000 | -0.667111000 | -0.131062000 |

|   |              |              |              |
|---|--------------|--------------|--------------|
| O | -3.717551000 | 0.440079000  | -0.195674000 |
| C | -5.845475000 | -0.721314000 | -0.272702000 |
| H | -6.295772000 | 0.209364000  | 0.080012000  |
| H | -6.094696000 | -0.844794000 | -1.333504000 |
| H | -6.249276000 | -1.575056000 | 0.276347000  |
| C | 0.704352000  | 0.824768000  | 0.024152000  |
| N | 1.402077000  | 1.983418000  | 0.057230000  |
| C | 0.871354000  | 3.374272000  | 0.066102000  |
| C | 0.054155000  | 3.643652000  | -1.209769000 |
| H | -0.839459000 | 3.018013000  | -1.251047000 |
| H | -0.260121000 | 4.692874000  | -1.231152000 |
| H | 0.657580000  | 3.449200000  | -2.103200000 |
| C | 2.110732000  | 4.284040000  | 0.084565000  |
| H | 1.803934000  | 5.333813000  | 0.094207000  |
| H | 2.721809000  | 4.107531000  | 0.978245000  |
| H | 2.734337000  | 4.123919000  | -0.802736000 |
| C | 0.025254000  | 3.625985000  | 1.328012000  |
| H | 0.610552000  | 3.426550000  | 2.232643000  |
| H | -0.299157000 | 4.672165000  | 1.355893000  |
| H | -0.863112000 | 2.991284000  | 1.342305000  |
| H | 1.462210000  | -3.642617000 | 0.304048000  |
| O | -0.579988000 | 0.919434000  | -0.004625000 |
| H | 2.393486000  | 1.894596000  | 0.221217000  |

### 18. [VIII]

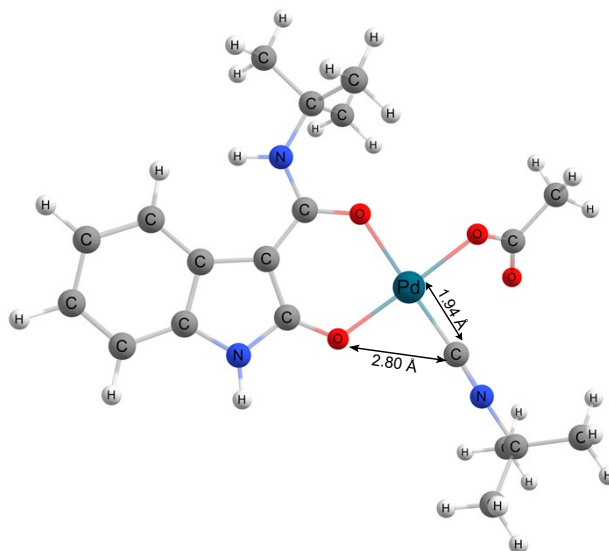

|                                              |                             |
|----------------------------------------------|-----------------------------|
| Zero-point correction=                       | 0.446774 (Hartree/Particle) |
| Thermal correction to Energy=                | 0.478187                    |
| Thermal correction to Enthalpy=              | 0.479131                    |
| Thermal correction to Gibbs Free Energy=     | 0.380149                    |
| Sum of electronic and zero-point Energies=   | -1371.210963                |
| Sum of electronic and thermal Energies=      | -1371.179549                |
| Sum of electronic and thermal Enthalpies=    | -1371.178605                |
| Sum of electronic and thermal Free Energies= | -1371.277588                |

|    |              |              |              |
|----|--------------|--------------|--------------|
| C  | 3.417133000  | -1.535342000 | -0.030595000 |
| C  | 3.046567000  | -2.903304000 | 0.104956000  |
| C  | 3.965901000  | -3.947185000 | 0.102970000  |
| C  | 5.318774000  | -3.625605000 | -0.050202000 |
| C  | 5.716477000  | -2.290600000 | -0.207293000 |
| C  | 4.782142000  | -1.248474000 | -0.203447000 |
| C  | 2.181970000  | -0.760037000 | 0.016272000  |
| C  | 1.121183000  | -1.694590000 | 0.154179000  |
| H  | 3.641378000  | -4.978558000 | 0.211174000  |
| H  | 6.062185000  | -4.417315000 | -0.056161000 |
| H  | 6.768788000  | -2.056747000 | -0.342337000 |
| H  | 5.141837000  | -0.237240000 | -0.365925000 |
| O  | -0.158643000 | -1.564109000 | 0.240822000  |
| N  | 1.662878000  | -2.957205000 | 0.213307000  |
| Pd | -1.011747000 | 0.259112000  | -0.096769000 |
| O  | -1.783123000 | 2.078117000  | -0.515227000 |
| C  | -2.814811000 | 2.562390000  | 0.127759000  |
| O  | -3.472062000 | 1.976562000  | 0.992409000  |
| C  | -3.134653000 | 3.995019000  | -0.279877000 |
| H  | -4.171687000 | 4.230782000  | -0.031695000 |
| H  | -2.480870000 | 4.673973000  | 0.280232000  |
| H  | -2.951517000 | 4.158735000  | -1.344899000 |
| C  | 1.969523000  | 0.659848000  | -0.003901000 |
| N  | 3.042471000  | 1.483788000  | 0.072721000  |
| C  | 3.050925000  | 2.971334000  | 0.071824000  |
| C  | 2.443232000  | 3.508050000  | -1.236307000 |
| H  | 1.388326000  | 3.241765000  | -1.322800000 |
| H  | 2.526862000  | 4.600247000  | -1.260526000 |
| H  | 2.977901000  | 3.105160000  | -2.103665000 |
| C  | 4.532681000  | 3.373826000  | 0.153527000  |
| H  | 4.624703000  | 4.463827000  | 0.158985000  |
| H  | 4.999265000  | 2.996052000  | 1.071697000  |
| H  | 5.095628000  | 2.992751000  | -0.706548000 |
| C  | 2.295182000  | 3.520695000  | 1.296301000  |
| H  | 2.728680000  | 3.132696000  | 2.225032000  |
| H  | 2.365297000  | 4.614069000  | 1.318627000  |
| H  | 1.239538000  | 3.243918000  | 1.263202000  |
| H  | 1.102357000  | -3.791280000 | 0.314414000  |
| O  | 0.812089000  | 1.203077000  | -0.093482000 |
| H  | 3.920035000  | 1.041705000  | 0.301617000  |
| C  | -2.753734000 | -0.584402000 | -0.083098000 |
| N  | -3.760773000 | -1.165394000 | -0.093974000 |
| C  | -5.057249000 | -1.816351000 | -0.046992000 |
| C  | -4.895954000 | -3.221153000 | -0.651619000 |
| H  | -5.860227000 | -3.737813000 | -0.628350000 |
| H  | -4.558113000 | -3.163270000 | -1.690814000 |
| H  | -4.172081000 | -3.811295000 | -0.081451000 |
| C  | -6.034691000 | -0.961435000 | -0.871913000 |
| H  | -7.024502000 | -1.427810000 | -0.853256000 |



|   |              |              |              |
|---|--------------|--------------|--------------|
| H | -6.115738000 | 0.046870000  | -0.456602000 |
| H | -5.705705000 | -0.886847000 | -1.912867000 |
| C | -5.485367000 | -1.886987000 | 1.429157000  |
| H | -4.768334000 | -2.469231000 | 2.015716000  |
| H | -5.558429000 | -0.885064000 | 1.861129000  |
| H | -6.464719000 | -2.370905000 | 1.496699000  |

### 19. [IX]

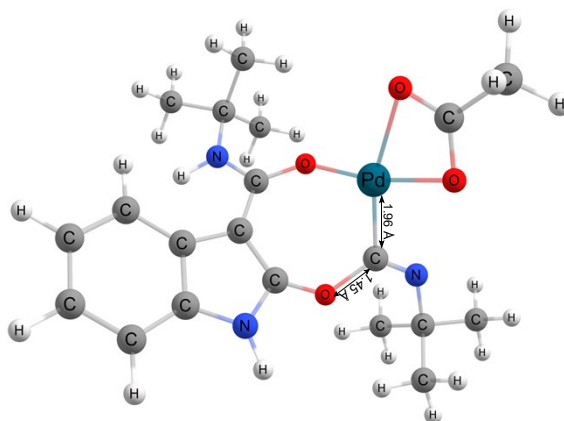

|                                              |                             |
|----------------------------------------------|-----------------------------|
| Zero-point correction=                       | 0.447625 (Hartree/Particle) |
| Thermal correction to Energy=                | 0.478034                    |
| Thermal correction to Enthalpy=              | 0.478979                    |
| Thermal correction to Gibbs Free Energy=     | 0.384428                    |
| Sum of electronic and zero-point Energies=   | -1371.170337                |
| Sum of electronic and thermal Energies=      | -1371.139928                |
| Sum of electronic and thermal Enthalpies=    | -1371.138984                |
| Sum of electronic and thermal Free Energies= | -1371.233534                |

|    |              |              |              |
|----|--------------|--------------|--------------|
| C  | 2.596674000  | -1.404311000 | -0.614180000 |
| C  | 2.145998000  | -2.679772000 | -1.048755000 |
| C  | 2.956647000  | -3.571623000 | -1.752439000 |
| C  | 4.260864000  | -3.168403000 | -2.036100000 |
| C  | 4.728078000  | -1.902660000 | -1.634225000 |
| C  | 3.910643000  | -1.016681000 | -0.933486000 |
| C  | 1.476596000  | -0.767166000 | 0.059028000  |
| C  | 0.417577000  | -1.673411000 | -0.008941000 |
| H  | 2.581980000  | -4.539431000 | -2.073225000 |
| H  | 4.920307000  | -3.835994000 | -2.582647000 |
| H  | 5.743533000  | -1.606828000 | -1.881682000 |
| H  | 4.288502000  | -0.036350000 | -0.659903000 |
| O  | -0.809980000 | -1.698624000 | 0.528693000  |
| N  | 0.820688000  | -2.804547000 | -0.661945000 |
| Pd | -1.208941000 | 0.983159000  | -0.595422000 |
| O  | -2.684399000 | 1.071271000  | -2.069497000 |
| C  | -2.212629000 | 2.153519000  | -2.582672000 |
| O  | -1.176814000 | 2.676566000  | -2.071263000 |
| C  | -2.883597000 | 2.748694000  | -3.789038000 |
| H  | -2.704987000 | 3.825537000  | -3.830590000 |

|   |              |              |              |
|---|--------------|--------------|--------------|
| H | -2.457302000 | 2.294023000  | -4.691395000 |
| H | -3.956075000 | 2.539939000  | -3.777561000 |
| C | 1.419152000  | 0.536821000  | 0.708211000  |
| N | 2.537528000  | 0.995452000  | 1.299214000  |
| C | 2.740184000  | 2.310816000  | 1.972990000  |
| C | 2.485062000  | 3.457953000  | 0.980424000  |
| H | 1.447049000  | 3.475075000  | 0.642853000  |
| H | 2.702797000  | 4.415549000  | 1.465309000  |
| H | 3.134097000  | 3.364718000  | 0.103025000  |
| C | 4.210664000  | 2.324269000  | 2.419199000  |
| H | 4.435078000  | 3.263387000  | 2.932820000  |
| H | 4.424117000  | 1.504384000  | 3.115748000  |
| H | 4.888741000  | 2.240377000  | 1.561952000  |
| C | 1.820141000  | 2.425768000  | 3.201917000  |
| H | 2.000318000  | 1.600683000  | 3.900105000  |
| H | 2.019923000  | 3.365925000  | 3.727288000  |
| H | 0.767572000  | 2.411624000  | 2.911397000  |
| H | 0.221202000  | -3.603373000 | -0.817620000 |
| O | 0.359756000  | 1.237680000  | 0.735898000  |
| H | 3.294661000  | 0.329824000  | 1.383514000  |
| C | -1.762825000 | -0.608995000 | 0.403598000  |
| N | -2.884729000 | -0.704076000 | 0.941717000  |
| C | -3.459040000 | -1.804750000 | 1.749360000  |
| C | -3.579074000 | -3.086577000 | 0.902250000  |
| H | -4.113604000 | -3.860257000 | 1.465852000  |
| H | -4.140216000 | -2.886906000 | -0.017042000 |
| H | -2.597193000 | -3.481581000 | 0.629034000  |
| C | -4.865430000 | -1.336945000 | 2.163229000  |
| H | -5.370141000 | -2.100878000 | 2.765736000  |
| H | -4.805524000 | -0.414637000 | 2.750847000  |
| H | -5.476421000 | -1.130770000 | 1.278197000  |
| C | -2.612167000 | -2.054868000 | 3.012485000  |
| H | -1.617833000 | -2.435396000 | 2.765135000  |
| H | -2.494223000 | -1.127753000 | 3.584201000  |
| H | -3.109102000 | -2.789210000 | 3.657380000  |

20. [X]

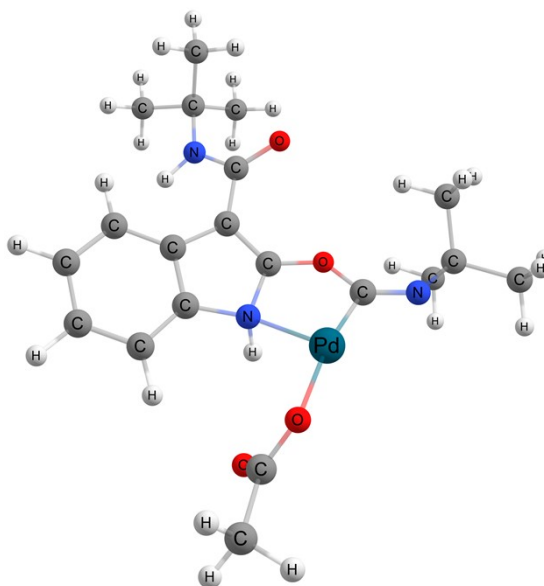

|                                              |                             |
|----------------------------------------------|-----------------------------|
| Zero-point correction=                       | 0.447055 (Hartree/Particle) |
| Thermal correction to Energy=                | 0.477988                    |
| Thermal correction to Enthalpy=              | 0.478932                    |
| Thermal correction to Gibbs Free Energy=     | 0.381745                    |
| Sum of electronic and zero-point Energies=   | -1371.130225                |
| Sum of electronic and thermal Energies=      | -1371.099292                |
| Sum of electronic and thermal Enthalpies=    | -1371.098348                |
| Sum of electronic and thermal Free Energies= | -1371.195535                |

|    |              |              |              |
|----|--------------|--------------|--------------|
| C  | 1.194996000  | -2.005208000 | 0.037712000  |
| C  | -0.176222000 | -2.137159000 | 0.339572000  |
| C  | -0.835659000 | -3.355191000 | 0.383889000  |
| C  | -0.082936000 | -4.495558000 | 0.075777000  |
| C  | 1.272570000  | -4.392441000 | -0.264755000 |
| C  | 1.925133000  | -3.154606000 | -0.287385000 |
| C  | 1.533799000  | -0.575732000 | 0.098399000  |
| C  | 0.391036000  | 0.072505000  | 0.435334000  |
| H  | -1.887942000 | -3.406781000 | 0.642259000  |
| H  | -0.562560000 | -5.469421000 | 0.091702000  |
| H  | 1.829715000  | -5.290112000 | -0.517084000 |
| H  | 2.972773000  | -3.095142000 | -0.563593000 |
| O  | 0.123964000  | 1.390390000  | 0.544855000  |
| N  | -0.714284000 | -0.826639000 | 0.607578000  |
| Pd | -2.353722000 | 0.227394000  | -0.339172000 |
| O  | -3.709373000 | -1.975073000 | 1.255300000  |
| C  | -4.254711000 | -1.927135000 | 0.134563000  |
| O  | -3.872010000 | -1.147616000 | -0.827850000 |
| C  | -5.441670000 | -2.817279000 | -0.196623000 |
| H  | -5.204964000 | -3.448282000 | -1.060431000 |
| H  | -5.707046000 | -3.446004000 | 0.655491000  |
| H  | -6.301837000 | -2.199261000 | -0.476471000 |
| C  | 2.830361000  | 0.097105000  | -0.237245000 |

|   |              |              |              |
|---|--------------|--------------|--------------|
| N | 3.933764000  | -0.575868000 | 0.190896000  |
| C | 5.348901000  | -0.148905000 | 0.030971000  |
| C | 5.694865000  | -0.027499000 | -1.463706000 |
| H | 5.091373000  | 0.743817000  | -1.946813000 |
| H | 6.751791000  | 0.236664000  | -1.579233000 |
| H | 5.522650000  | -0.978434000 | -1.979972000 |
| C | 6.200811000  | -1.253907000 | 0.675315000  |
| H | 7.262686000  | -1.002995000 | 0.595654000  |
| H | 5.964944000  | -1.369744000 | 1.740293000  |
| H | 6.045616000  | -2.218016000 | 0.176901000  |
| C | 5.586293000  | 1.187680000  | 0.757864000  |
| H | 5.343534000  | 1.098195000  | 1.822787000  |
| H | 6.638920000  | 1.479320000  | 0.671982000  |
| H | 4.972342000  | 1.981950000  | 0.327117000  |
| H | -1.153906000 | -0.777686000 | 1.534077000  |
| O | 2.861373000  | 1.163710000  | -0.855080000 |
| H | 3.772308000  | -1.376109000 | 0.788525000  |
| C | -1.170853000 | 1.717700000  | 0.065215000  |
| N | -1.625314000 | 2.864222000  | -0.080560000 |
| C | -1.001399000 | 4.200104000  | 0.107605000  |
| C | -0.552630000 | 4.353699000  | 1.572804000  |
| H | -0.173414000 | 5.368493000  | 1.738144000  |
| H | -1.393665000 | 4.190917000  | 2.255558000  |
| H | 0.244283000  | 3.649013000  | 1.825836000  |
| C | -2.080371000 | 5.240721000  | -0.224457000 |
| H | -1.682451000 | 6.255064000  | -0.112667000 |
| H | -2.430719000 | 5.118608000  | -1.254746000 |
| H | -2.942720000 | 5.132080000  | 0.442027000  |
| C | 0.191448000  | 4.341404000  | -0.854829000 |
| H | 0.972918000  | 3.607287000  | -0.641082000 |
| H | -0.132302000 | 4.207951000  | -1.892564000 |
| H | 0.625527000  | 5.343421000  | -0.761069000 |

21. [XI]

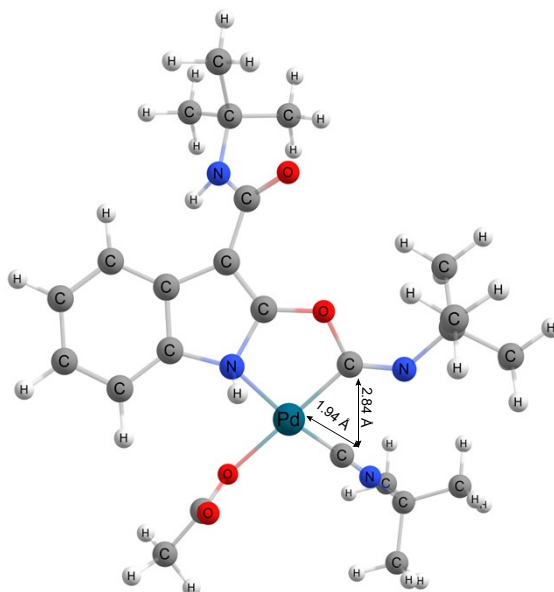

|                                              |                             |
|----------------------------------------------|-----------------------------|
| Zero-point correction=                       | 0.578967 (Hartree/Particle) |
| Thermal correction to Energy=                | 0.617512                    |
| Thermal correction to Enthalpy=              | 0.618456                    |
| Thermal correction to Gibbs Free Energy=     | 0.504775                    |
| Sum of electronic and zero-point Energies=   | -1621.745550                |
| Sum of electronic and thermal Energies=      | -1621.707005                |
| Sum of electronic and thermal Enthalpies=    | -1621.706061                |
| Sum of electronic and thermal Free Energies= | -1621.819742                |

|    |              |              |              |
|----|--------------|--------------|--------------|
| C  | -2.663853000 | 1.734074000  | -0.324740000 |
| C  | -1.426615000 | 2.305667000  | -0.687489000 |
| C  | -1.206587000 | 3.673765000  | -0.723744000 |
| C  | -2.269159000 | 4.505042000  | -0.346451000 |
| C  | -3.503634000 | 3.963536000  | 0.035724000  |
| C  | -3.717070000 | 2.581095000  | 0.044004000  |
| C  | -2.548564000 | 0.279834000  | -0.474878000 |
| C  | -1.291079000 | 0.037411000  | -0.937334000 |
| H  | -0.253144000 | 4.077007000  | -1.043591000 |
| H  | -2.131467000 | 5.582023000  | -0.357354000 |
| H  | -4.315526000 | 4.628366000  | 0.316849000  |
| H  | -4.691235000 | 2.179852000  | 0.304327000  |
| O  | -0.663164000 | -1.113353000 | -1.181786000 |
| N  | -0.520667000 | 1.245887000  | -1.057191000 |
| Pd | 1.368589000  | 0.646665000  | -0.133454000 |
| O  | 2.010980000  | 2.554413000  | 0.529181000  |
| C  | 2.229790000  | 3.396888000  | -0.431951000 |
| O  | 1.981791000  | 3.181091000  | -1.633417000 |
| C  | 2.849473000  | 4.715633000  | 0.009108000  |
| H  | 2.685374000  | 5.488719000  | -0.744975000 |
| H  | 2.449948000  | 5.036177000  | 0.975288000  |
| H  | 3.930865000  | 4.575309000  | 0.127799000  |
| C  | -3.552995000 | -0.781860000 | -0.167757000 |
| N  | -4.325650000 | -0.532003000 | 0.929257000  |

|   |              |              |              |
|---|--------------|--------------|--------------|
| C | -5.382749000 | -1.417671000 | 1.480974000  |
| C | -6.488620000 | -1.633137000 | 0.432268000  |
| H | -6.100085000 | -2.146338000 | -0.449785000 |
| H | -7.293589000 | -2.240480000 | 0.860843000  |
| H | -6.915137000 | -0.674209000 | 0.117266000  |
| C | -5.960067000 | -0.681454000 | 2.700133000  |
| H | -6.749711000 | -1.281373000 | 3.162368000  |
| H | -5.188943000 | -0.503269000 | 3.459764000  |
| H | -6.394705000 | 0.283263000  | 2.413082000  |
| C | -4.778330000 | -2.764299000 | 1.920979000  |
| H | -3.994690000 | -2.610284000 | 2.671547000  |
| H | -5.554608000 | -3.398354000 | 2.364091000  |
| H | -4.343959000 | -3.293552000 | 1.069873000  |
| H | -0.122139000 | 1.389357000  | -1.991698000 |
| O | -3.661545000 | -1.791008000 | -0.870166000 |
| H | -4.050070000 | 0.248848000  | 1.510543000  |
| C | 0.750365000  | -1.148151000 | -0.798874000 |
| N | 1.406919000  | -2.202245000 | -0.967867000 |
| C | 0.933307000  | -3.487532000 | -1.543522000 |
| C | -0.174729000 | -4.099839000 | -0.664589000 |
| H | -0.428348000 | -5.101674000 | -1.030478000 |
| H | 0.168118000  | -4.196393000 | 0.372030000  |
| H | -1.082664000 | -3.493217000 | -0.677290000 |
| C | 2.157440000  | -4.420338000 | -1.544418000 |
| H | 1.898928000  | -5.402019000 | -1.957071000 |
| H | 2.966878000  | -3.994065000 | -2.147347000 |
| H | 2.534443000  | -4.562471000 | -0.525680000 |
| C | 0.443386000  | -3.295298000 | -2.992514000 |
| H | -0.468695000 | -2.696163000 | -3.036120000 |
| H | 1.214679000  | -2.804012000 | -3.596686000 |
| H | 0.230928000  | -4.270697000 | -3.445300000 |
| C | 2.988421000  | -0.116941000 | 0.617875000  |
| N | 3.974021000  | -0.528761000 | 1.076787000  |
| C | 5.212327000  | -1.042659000 | 1.634568000  |
| C | 5.094741000  | -0.970595000 | 3.166841000  |
| H | 4.258398000  | -1.579246000 | 3.523353000  |
| H | 6.017169000  | -1.350543000 | 3.616470000  |
| H | 4.944385000  | 0.060773000  | 3.499454000  |
| C | 5.374370000  | -2.493820000 | 1.152601000  |
| H | 5.417292000  | -2.540315000 | 0.060747000  |
| H | 6.304386000  | -2.904585000 | 1.557482000  |
| H | 4.540590000  | -3.114153000 | 1.493306000  |
| C | 6.354833000  | -0.150271000 | 1.119727000  |
| H | 6.409560000  | -0.177748000 | 0.027421000  |
| H | 6.213594000  | 0.887153000  | 1.437063000  |
| H | 7.304810000  | -0.512019000 | 1.524636000  |

22. [XII]

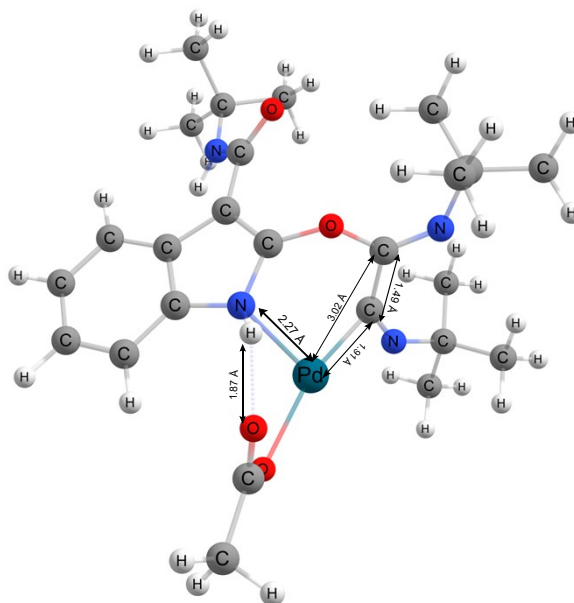

|                                              |                             |
|----------------------------------------------|-----------------------------|
| Zero-point correction=                       | 0.579673 (Hartree/Particle) |
| Thermal correction to Energy=                | 0.618400                    |
| Thermal correction to Enthalpy=              | 0.619344                    |
| Thermal correction to Gibbs Free Energy=     | 0.506056                    |
| Sum of electronic and zero-point Energies=   | -1621.720294                |
| Sum of electronic and thermal Energies=      | -1621.681567                |
| Sum of electronic and thermal Enthalpies=    | -1621.680623                |
| Sum of electronic and thermal Free Energies= | -1621.793910                |

|    |              |              |              |
|----|--------------|--------------|--------------|
| C  | 1.195976000  | -2.577599000 | -0.293817000 |
| C  | -0.192686000 | -2.703303000 | -0.528532000 |
| C  | -0.872958000 | -3.912055000 | -0.390219000 |
| C  | -0.131415000 | -5.023052000 | 0.011473000  |
| C  | 1.249446000  | -4.922421000 | 0.259034000  |
| C  | 1.923260000  | -3.711439000 | 0.106997000  |
| C  | 1.564997000  | -1.202469000 | -0.603276000 |
| C  | 0.416571000  | -0.585309000 | -1.023504000 |
| H  | -1.935296000 | -3.984395000 | -0.588535000 |
| H  | -0.630162000 | -5.980294000 | 0.130309000  |
| H  | 1.802930000  | -5.806498000 | 0.562513000  |
| H  | 2.995296000  | -3.659253000 | 0.268257000  |
| O  | 0.259526000  | 0.686242000  | -1.480158000 |
| N  | -0.699213000 | -1.443961000 | -0.930649000 |
| Pd | -2.067465000 | -0.376765000 | 0.537783000  |
| O  | -3.682223000 | -1.833696000 | 0.502182000  |
| C  | -3.994604000 | -2.167929000 | -0.698764000 |
| O  | -3.335665000 | -1.859833000 | -1.728074000 |
| C  | -5.275656000 | -2.971831000 | -0.859691000 |
| H  | -5.219187000 | -3.619346000 | -1.738334000 |
| H  | -5.489457000 | -3.560330000 | 0.036024000  |
| H  | -6.108546000 | -2.273803000 | -1.010576000 |
| C  | 2.903844000  | -0.550032000 | -0.492698000 |
| N  | 3.646795000  | -0.963244000 | 0.573468000  |

|   |              |              |              |
|---|--------------|--------------|--------------|
| C | 5.012640000  | -0.502442000 | 0.932903000  |
| C | 5.994903000  | -0.826388000 | -0.207055000 |
| H | 5.726717000  | -0.292821000 | -1.121326000 |
| H | 7.009904000  | -0.531571000 | 0.081638000  |
| H | 5.999407000  | -1.901119000 | -0.420165000 |
| C | 5.406558000  | -1.283618000 | 2.196740000  |
| H | 6.408534000  | -0.989086000 | 2.522884000  |
| H | 4.713409000  | -1.081218000 | 3.022530000  |
| H | 5.418223000  | -2.363804000 | 2.009597000  |
| C | 5.005740000  | 1.007878000  | 1.234242000  |
| H | 4.309214000  | 1.236673000  | 2.048968000  |
| H | 6.006086000  | 1.334271000  | 1.540147000  |
| H | 4.710144000  | 1.580485000  | 0.352322000  |
| H | -1.516593000 | -1.431672000 | -1.575908000 |
| O | 3.291895000  | 0.287283000  | -1.314032000 |
| H | 3.185040000  | -1.562138000 | 1.244809000  |
| C | -0.235653000 | 1.704136000  | -0.662192000 |
| N | -0.177629000 | 2.928475000  | -0.941766000 |
| C | 0.423024000  | 3.539647000  | -2.153295000 |
| C | 1.950220000  | 3.339369000  | -2.126088000 |
| H | 2.397374000  | 3.847163000  | -2.988118000 |
| H | 2.379564000  | 3.777952000  | -1.218231000 |
| H | 2.226960000  | 2.283555000  | -2.161882000 |
| C | 0.090197000  | 5.039481000  | -2.074917000 |
| H | 0.529636000  | 5.573941000  | -2.923820000 |
| H | -0.993170000 | 5.201351000  | -2.091943000 |
| H | 0.485486000  | 5.476908000  | -1.151987000 |
| C | -0.191135000 | 2.945468000  | -3.436565000 |
| H | 0.098627000  | 1.903652000  | -3.586554000 |
| H | -1.284940000 | 3.004465000  | -3.408185000 |
| H | 0.153821000  | 3.521830000  | -4.301776000 |
| C | -1.041770000 | 1.235144000  | 0.504587000  |
| N | -1.569474000 | 1.695575000  | 1.526227000  |
| C | -1.664058000 | 2.942621000  | 2.319483000  |
| C | -2.280031000 | 2.567198000  | 3.673878000  |
| H | -1.645492000 | 1.851527000  | 4.206970000  |
| H | -2.389056000 | 3.461333000  | 4.295925000  |
| H | -3.267882000 | 2.115338000  | 3.539596000  |
| C | -0.255403000 | 3.530823000  | 2.504119000  |
| H | 0.189575000  | 3.799122000  | 1.543008000  |
| H | -0.317810000 | 4.433786000  | 3.121096000  |
| H | 0.400599000  | 2.816475000  | 3.012832000  |
| C | -2.582763000 | 3.909736000  | 1.551926000  |
| H | -2.153909000 | 4.165709000  | 0.579721000  |
| H | -3.571478000 | 3.465634000  | 1.397944000  |
| H | -2.707223000 | 4.829824000  | 2.133279000  |

### 23. [TS-6]

Zero-point correction=

0.575548 (Hartree/Particle)



|                                              |              |
|----------------------------------------------|--------------|
| Thermal correction to Energy=                | 0.613689     |
| Thermal correction to Enthalpy=              | 0.614634     |
| Thermal correction to Gibbs Free Energy=     | 0.502960     |
| Sum of electronic and zero-point Energies=   | -1621.722959 |
| Sum of electronic and thermal Energies=      | -1621.684818 |
| Sum of electronic and thermal Enthalpies=    | -1621.683873 |
| Sum of electronic and thermal Free Energies= | -1621.795547 |

|    |              |              |              |
|----|--------------|--------------|--------------|
| C  | 1.546781000  | -2.389429000 | -0.087947000 |
| C  | 0.167473000  | -2.689462000 | -0.205034000 |
| C  | -0.345961000 | -3.952830000 | 0.095006000  |
| C  | 0.549118000  | -4.933187000 | 0.522978000  |
| C  | 1.924126000  | -4.658293000 | 0.635443000  |
| C  | 2.433566000  | -3.396908000 | 0.330325000  |
| C  | 1.715407000  | -1.007630000 | -0.509193000 |
| C  | 0.463306000  | -0.576548000 | -0.874809000 |
| H  | -1.405568000 | -4.164427000 | 0.010358000  |
| H  | 0.177292000  | -5.923805000 | 0.768033000  |
| H  | 2.601409000  | -5.444263000 | 0.957729000  |
| H  | 3.501223000  | -3.211030000 | 0.392866000  |
| O  | 0.127489000  | 0.656859000  | -1.354962000 |
| N  | -0.524454000 | -1.556046000 | -0.696196000 |
| Pd | -2.041949000 | -0.669582000 | 0.606473000  |
| O  | -3.471886000 | -2.317042000 | 0.127210000  |
| C  | -3.481455000 | -2.640122000 | -1.099910000 |
| O  | -2.565256000 | -2.337305000 | -1.944024000 |
| C  | -4.647288000 | -3.449370000 | -1.626249000 |
| H  | -5.384404000 | -3.633526000 | -0.843152000 |
| H  | -5.116824000 | -2.914124000 | -2.458327000 |
| H  | -4.282045000 | -4.403092000 | -2.022265000 |
| C  | 2.960621000  | -0.188703000 | -0.534768000 |
| N  | 3.830055000  | -0.450111000 | 0.485276000  |
| C  | 5.146821000  | 0.196425000  | 0.713813000  |
| C  | 6.073053000  | -0.050617000 | -0.490629000 |
| H  | 5.667849000  | 0.402820000  | -1.397574000 |
| H  | 7.060229000  | 0.383475000  | -0.296415000 |
| H  | 6.200933000  | -1.124537000 | -0.666361000 |
| C  | 5.736822000  | -0.469812000 | 1.967210000  |
| H  | 6.712522000  | -0.033391000 | 2.201056000  |
| H  | 5.087891000  | -0.322931000 | 2.839454000  |
| H  | 5.877686000  | -1.546544000 | 1.816613000  |
| C  | 4.966802000  | 1.706051000  | 0.961579000  |
| H  | 4.312734000  | 1.881513000  | 1.823436000  |
| H  | 5.936521000  | 2.172175000  | 1.169849000  |
| H  | 4.529034000  | 2.194233000  | 0.088012000  |
| H  | -1.445818000 | -1.823130000 | -1.397997000 |
| O  | 3.180458000  | 0.648640000  | -1.417356000 |
| H  | 3.497499000  | -1.060298000 | 1.219962000  |
| C  | -0.511375000 | 1.606980000  | -0.567683000 |
| N  | -0.630499000 | 2.821280000  | -0.879084000 |

|   |              |             |              |
|---|--------------|-------------|--------------|
| C | -0.116341000 | 3.475196000 | -2.108180000 |
| C | 1.423294000  | 3.504510000 | -2.068798000 |
| H | 1.798359000  | 4.049542000 | -2.942513000 |
| H | 1.774839000  | 4.026510000 | -1.171479000 |
| H | 1.852771000  | 2.500334000 | -2.076073000 |
| C | -0.667261000 | 4.911405000 | -2.080341000 |
| H | -0.303323000 | 5.477892000 | -2.944159000 |
| H | -1.762531000 | 4.911460000 | -2.108596000 |
| H | -0.349900000 | 5.431679000 | -1.170357000 |
| C | -0.623608000 | 2.758758000 | -3.375755000 |
| H | -0.183441000 | 1.766603000 | -3.491186000 |
| H | -1.714647000 | 2.657663000 | -3.355291000 |
| H | -0.358170000 | 3.353140000 | -4.256813000 |
| C | -1.263349000 | 1.072039000 | 0.614107000  |
| N | -1.884165000 | 1.498165000 | 1.597988000  |
| C | -2.172515000 | 2.762461000 | 2.314144000  |
| C | -2.788761000 | 2.377989000 | 3.666202000  |
| H | -2.089186000 | 1.779067000 | 4.258626000  |
| H | -3.038329000 | 3.279372000 | 4.235097000  |
| H | -3.703903000 | 1.794312000 | 3.523758000  |
| C | -0.862326000 | 3.541823000 | 2.515009000  |
| H | -0.417719000 | 3.818944000 | 1.556369000  |
| H | -1.068386000 | 4.457550000 | 3.079887000  |
| H | -0.139706000 | 2.947048000 | 3.083828000  |
| C | -3.178598000 | 3.560798000 | 1.466492000  |
| H | -2.748014000 | 3.823880000 | 0.497265000  |
| H | -4.093990000 | 2.982482000 | 1.303650000  |
| H | -3.446325000 | 4.482806000 | 1.994027000  |

#### 24. [XIII]

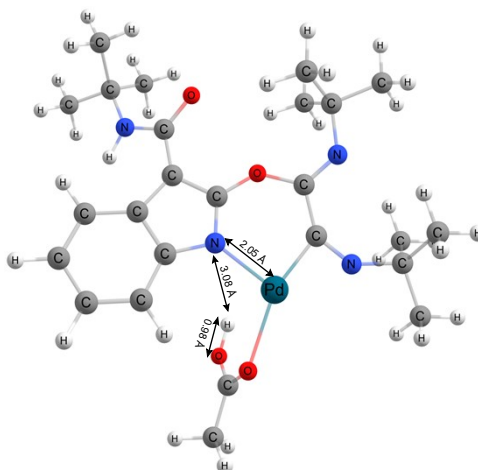

|                                            |                             |
|--------------------------------------------|-----------------------------|
| Zero-point correction=                     | 0.580018 (Hartree/Particle) |
| Thermal correction to Energy=              | 0.618908                    |
| Thermal correction to Enthalpy=            | 0.619852                    |
| Thermal correction to Gibbs Free Energy=   | 0.505718                    |
| Sum of electronic and zero-point Energies= | -1621.731495                |

|                                              |              |
|----------------------------------------------|--------------|
| Sum of electronic and thermal Energies=      | -1621.692605 |
| Sum of electronic and thermal Enthalpies=    | -1621.691661 |
| Sum of electronic and thermal Free Energies= | -1621.805795 |

|    |              |              |              |
|----|--------------|--------------|--------------|
| C  | 2.082662000  | -1.888289000 | -0.612254000 |
| C  | 0.698052000  | -2.222414000 | -0.734125000 |
| C  | 0.279236000  | -3.511868000 | -1.083299000 |
| C  | 1.250057000  | -4.488660000 | -1.300079000 |
| C  | 2.620038000  | -4.177431000 | -1.189899000 |
| C  | 3.042619000  | -2.891139000 | -0.859513000 |
| C  | 2.134316000  | -0.476290000 | -0.311966000 |
| C  | 0.791527000  | -0.078282000 | -0.288684000 |
| H  | -0.775750000 | -3.734559000 | -1.208544000 |
| H  | 0.947626000  | -5.495333000 | -1.575927000 |
| H  | 3.360799000  | -4.949044000 | -1.382631000 |
| H  | 4.104876000  | -2.668386000 | -0.825725000 |
| O  | 0.426592000  | 1.222693000  | -0.033068000 |
| N  | -0.077879000 | -1.093303000 | -0.507148000 |
| Pd | -2.104559000 | -0.926932000 | -0.225889000 |
| O  | -2.087691000 | -3.340193000 | 1.954991000  |
| C  | -2.843076000 | -3.714565000 | 0.922773000  |
| O  | -2.986326000 | -3.011715000 | -0.080051000 |
| C  | -3.481581000 | -5.055751000 | 1.099599000  |
| H  | -4.157290000 | -5.260267000 | 0.269748000  |
| H  | -2.700837000 | -5.823378000 | 1.139263000  |
| H  | -4.024524000 | -5.090025000 | 2.049055000  |
| C  | 3.307446000  | 0.390110000  | -0.080748000 |
| N  | 4.406221000  | -0.258267000 | 0.426590000  |
| C  | 5.711801000  | 0.353295000  | 0.765890000  |
| C  | 6.347913000  | 0.977710000  | -0.489583000 |
| H  | 5.726268000  | 1.785303000  | -0.881486000 |
| H  | 7.336496000  | 1.384003000  | -0.246391000 |
| H  | 6.471416000  | 0.223254000  | -1.274607000 |
| C  | 6.600635000  | -0.792636000 | 1.277257000  |
| H  | 7.587733000  | -0.409965000 | 1.554983000  |
| H  | 6.165514000  | -1.268257000 | 2.165114000  |
| H  | 6.741125000  | -1.560109000 | 0.507146000  |
| C  | 5.545001000  | 1.412773000  | 1.872920000  |
| H  | 5.102431000  | 0.966092000  | 2.770965000  |
| H  | 6.519654000  | 1.833603000  | 2.146657000  |
| H  | 4.897609000  | 2.225093000  | 1.535251000  |
| H  | -1.672589000 | -2.475686000 | 1.741730000  |
| O  | 3.313517000  | 1.606306000  | -0.327130000 |
| H  | 4.254084000  | -1.197158000 | 0.767950000  |
| C  | -0.795717000 | 1.828574000  | -0.144306000 |
| N  | -0.951231000 | 3.086313000  | -0.227280000 |
| C  | 0.136833000  | 4.088267000  | -0.311407000 |
| C  | 0.993474000  | 4.063676000  | 0.971144000  |
| H  | 1.698452000  | 4.902309000  | 0.952882000  |
| H  | 0.361801000  | 4.174241000  | 1.860371000  |

|   |              |             |              |
|---|--------------|-------------|--------------|
| H | 1.570364000  | 3.140703000 | 1.048796000  |
| C | -0.563429000 | 5.452944000 | -0.436852000 |
| H | 0.175413000  | 6.258903000 | -0.502002000 |
| H | -1.188107000 | 5.488871000 | -1.336243000 |
| H | -1.204928000 | 5.645847000 | 0.430293000  |
| C | 1.008212000  | 3.835647000 | -1.558720000 |
| H | 1.597239000  | 2.921936000 | -1.459722000 |
| H | 0.383578000  | 3.777313000 | -2.457749000 |
| H | 1.705145000  | 4.671610000 | -1.688106000 |
| C | -1.996406000 | 0.968204000 | -0.104789000 |
| N | -3.231883000 | 1.047264000 | 0.021761000  |
| C | -4.288208000 | 2.066020000 | 0.236594000  |
| C | -4.352825000 | 2.961008000 | -1.013270000 |
| H | -5.155927000 | 3.696265000 | -0.891771000 |
| H | -3.409420000 | 3.492194000 | -1.159084000 |
| H | -4.567501000 | 2.365214000 | -1.906562000 |
| C | -3.947019000 | 2.881553000 | 1.495106000  |
| H | -4.743916000 | 3.609300000 | 1.683359000  |
| H | -3.868138000 | 2.229134000 | 2.371370000  |
| H | -3.006078000 | 3.421628000 | 1.368010000  |
| C | -5.606652000 | 1.304292000 | 0.426005000  |
| H | -5.834814000 | 0.694945000 | -0.454625000 |
| H | -5.553578000 | 0.642181000 | 1.296831000  |
| H | -6.429322000 | 2.009854000 | 0.580123000  |

## 25. [XIV]

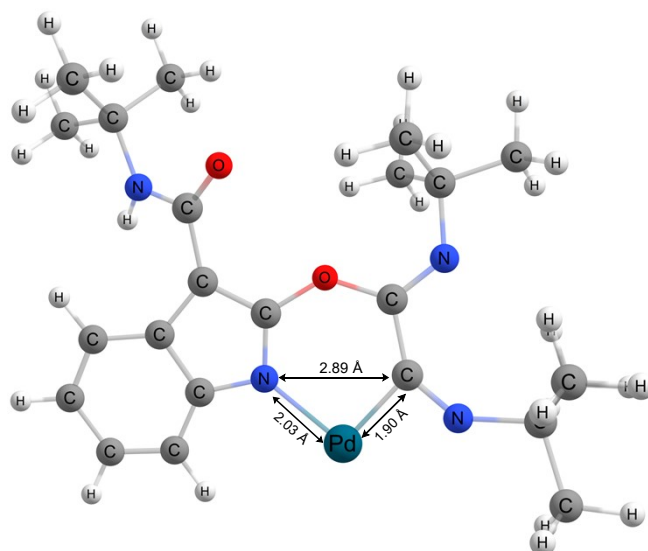

|                                            |                             |
|--------------------------------------------|-----------------------------|
| Zero-point correction=                     | 0.516944 (Hartree/Particle) |
| Thermal correction to Energy=              | 0.549715                    |
| Thermal correction to Enthalpy=            | 0.550659                    |
| Thermal correction to Gibbs Free Energy=   | 0.451914                    |
| Sum of electronic and zero-point Energies= | -1392.666856                |
| Sum of electronic and thermal Energies=    | -1392.634085                |
| Sum of electronic and thermal Enthalpies=  | -1392.633141                |

Sum of electronic and thermal Free Energies=

-1392.731886

|    |              |              |              |
|----|--------------|--------------|--------------|
| C  | 2.296241000  | -1.897364000 | -0.046308000 |
| C  | 1.062811000  | -2.581609000 | 0.185403000  |
| C  | 1.001831000  | -3.971159000 | 0.339610000  |
| C  | 2.187324000  | -4.698645000 | 0.253469000  |
| C  | 3.411992000  | -4.045706000 | 0.005205000  |
| C  | 3.476832000  | -2.661716000 | -0.147849000 |
| C  | 1.964803000  | -0.495795000 | -0.170880000 |
| C  | 0.574242000  | -0.454974000 | -0.011885000 |
| H  | 0.052102000  | -4.469425000 | 0.521997000  |
| H  | 2.167119000  | -5.778462000 | 0.371721000  |
| H  | 4.322729000  | -4.633346000 | -0.074410000 |
| H  | 4.430870000  | -2.191909000 | -0.367687000 |
| O  | -0.126442000 | 0.728048000  | -0.010173000 |
| N  | 0.022235000  | -1.667913000 | 0.216669000  |
| Pd | -1.981187000 | -1.990663000 | 0.132847000  |
| C  | 2.843945000  | 0.664395000  | -0.419223000 |
| N  | 4.131855000  | 0.517370000  | 0.031544000  |
| C  | 5.222233000  | 1.514440000  | -0.074879000 |
| C  | 5.504854000  | 1.837061000  | -1.553581000 |
| H  | 4.633341000  | 2.293364000  | -2.027337000 |
| H  | 6.348549000  | 2.532591000  | -1.630278000 |
| H  | 5.761600000  | 0.925333000  | -2.104529000 |
| C  | 6.463135000  | 0.860273000  | 0.554863000  |
| H  | 7.313079000  | 1.548812000  | 0.517234000  |
| H  | 6.287977000  | 0.604621000  | 1.607365000  |
| H  | 6.745423000  | -0.053376000 | 0.018821000  |
| C  | 4.862819000  | 2.797108000  | 0.700551000  |
| H  | 4.674061000  | 2.569927000  | 1.756263000  |
| H  | 5.688617000  | 3.516393000  | 0.649300000  |
| H  | 3.968620000  | 3.263733000  | 0.281288000  |
| O  | 2.458377000  | 1.690501000  | -1.000986000 |
| H  | 4.302575000  | -0.262978000 | 0.650669000  |
| C  | -1.464820000 | 0.976435000  | 0.072469000  |
| N  | -1.951616000 | 2.138256000  | 0.236247000  |
| C  | -1.163814000 | 3.382644000  | 0.401098000  |
| C  | -0.228056000 | 3.284831000  | 1.623808000  |
| H  | 0.238622000  | 4.259767000  | 1.802444000  |
| H  | -0.793081000 | 3.012406000  | 2.522700000  |
| H  | 0.567097000  | 2.553329000  | 1.470752000  |
| C  | -2.193788000 | 4.500968000  | 0.638950000  |
| H  | -1.690910000 | 5.466460000  | 0.759693000  |
| H  | -2.885819000 | 4.579384000  | -0.206515000 |
| H  | -2.781572000 | 4.306295000  | 1.542992000  |
| C  | -0.363803000 | 3.674902000  | -0.884972000 |
| H  | 0.420314000  | 2.933615000  | -1.054323000 |
| H  | -1.031725000 | 3.698822000  | -1.753974000 |
| H  | 0.109350000  | 4.660013000  | -0.800218000 |
| C  | -2.423151000 | -0.152409000 | -0.027524000 |

|   |              |              |              |
|---|--------------|--------------|--------------|
| N | -3.634802000 | -0.380222000 | -0.154765000 |
| C | -4.919085000 | 0.336304000  | -0.352521000 |
| C | -5.988585000 | -0.733761000 | -0.608921000 |
| H | -6.061978000 | -1.423034000 | 0.238819000  |
| H | -6.965044000 | -0.260753000 | -0.753174000 |
| H | -5.752679000 | -1.314866000 | -1.506607000 |
| C | -4.785759000 | 1.273424000  | -1.564226000 |
| H | -5.743707000 | 1.774656000  | -1.740292000 |
| H | -4.022034000 | 2.034406000  | -1.389040000 |
| H | -4.525569000 | 0.709228000  | -2.465961000 |
| C | -5.229697000 | 1.119451000  | 0.934771000  |
| H | -4.459072000 | 1.869286000  | 1.127834000  |
| H | -6.194713000 | 1.626132000  | 0.825542000  |
| H | -5.293733000 | 0.444651000  | 1.794795000  |

## 26. [TS-7]

|                                              |                             |
|----------------------------------------------|-----------------------------|
| Zero-point correction=                       | 0.515909 (Hartree/Particle) |
| Thermal correction to Energy=                | 0.548227                    |
| Thermal correction to Enthalpy=              | 0.549171                    |
| Thermal correction to Gibbs Free Energy=     | 0.451565                    |
| Sum of electronic and zero-point Energies=   | -1392.625707                |
| Sum of electronic and thermal Energies=      | -1392.593389                |
| Sum of electronic and thermal Enthalpies=    | -1392.592445                |
| Sum of electronic and thermal Free Energies= | -1392.690050                |

|    |              |              |              |
|----|--------------|--------------|--------------|
| C  | -1.841126000 | -1.759625000 | 0.121320000  |
| C  | -0.506309000 | -2.193794000 | -0.141706000 |
| C  | -0.130237000 | -3.535455000 | -0.117142000 |
| C  | -1.109071000 | -4.480564000 | 0.195894000  |
| C  | -2.429265000 | -4.080321000 | 0.468279000  |
| C  | -2.804358000 | -2.735560000 | 0.432935000  |
| C  | -1.843757000 | -0.301453000 | 0.039937000  |
| C  | -0.534582000 | 0.016084000  | -0.265145000 |
| H  | 0.895602000  | -3.825904000 | -0.323804000 |
| H  | -0.846499000 | -5.533808000 | 0.234526000  |
| H  | -3.173385000 | -4.831608000 | 0.718282000  |
| H  | -3.826181000 | -2.460909000 | 0.675746000  |
| O  | 0.108138000  | 1.216799000  | -0.304439000 |
| N  | 0.272365000  | -1.069639000 | -0.431560000 |
| Pd | 1.974297000  | -1.106392000 | -1.833878000 |
| C  | -2.916736000 | 0.689557000  | 0.282258000  |
| N  | -4.191348000 | 0.220039000  | 0.105230000  |
| C  | -5.442349000 | 1.003954000  | 0.245815000  |
| C  | -5.567898000 | 1.544731000  | 1.681563000  |
| H  | -4.755175000 | 2.236365000  | 1.912200000  |
| H  | -6.520407000 | 2.073929000  | 1.798678000  |
| H  | -5.541197000 | 0.723420000  | 2.406417000  |
| C  | -6.593213000 | 0.024897000  | -0.037938000 |
| H  | -7.555297000 | 0.539607000  | 0.046063000  |

|   |              |              |              |
|---|--------------|--------------|--------------|
| H | -6.524284000 | -0.388285000 | -1.052024000 |
| H | -6.592098000 | -0.806490000 | 0.676648000  |
| C | -5.476204000 | 2.157570000  | -0.775260000 |
| H | -5.396947000 | 1.771081000  | -1.798003000 |
| H | -6.419476000 | 2.709711000  | -0.692209000 |
| H | -4.651168000 | 2.852345000  | -0.602447000 |
| O | -2.668268000 | 1.854423000  | 0.621938000  |
| H | -4.279916000 | -0.673511000 | -0.358688000 |
| C | 1.471747000  | 1.077902000  | -0.078497000 |
| N | 2.297532000  | 2.029782000  | -0.034905000 |
| C | 1.953440000  | 3.459705000  | -0.232243000 |
| C | 1.387327000  | 3.684737000  | -1.649070000 |
| H | 1.252668000  | 4.757499000  | -1.825964000 |
| H | 2.080781000  | 3.302843000  | -2.407002000 |
| H | 0.418880000  | 3.196621000  | -1.782028000 |
| C | 3.275138000  | 4.232282000  | -0.081667000 |
| H | 3.112760000  | 5.307162000  | -0.216315000 |
| H | 3.706304000  | 4.071694000  | 0.912387000  |
| H | 4.006864000  | 3.897734000  | -0.825262000 |
| C | 0.951497000  | 3.935553000  | 0.839504000  |
| H | -0.015094000 | 3.434857000  | 0.748616000  |
| H | 1.345960000  | 3.752647000  | 1.845277000  |
| H | 0.789828000  | 5.014358000  | 0.735551000  |
| C | 1.898975000  | -0.368800000 | 0.052188000  |
| N | 2.682498000  | -1.039515000 | 0.760297000  |
| C | 3.607197000  | -0.685630000 | 1.861352000  |
| C | 4.026548000  | -2.014626000 | 2.511123000  |
| H | 4.506870000  | -2.668317000 | 1.775278000  |
| H | 4.732985000  | -1.836698000 | 3.329250000  |
| H | 3.155081000  | -2.540949000 | 2.914732000  |
| C | 2.896286000  | 0.200128000  | 2.902077000  |
| H | 3.561283000  | 0.363492000  | 3.757590000  |
| H | 2.632431000  | 1.176164000  | 2.488993000  |
| H | 1.986208000  | -0.286003000 | 3.269608000  |
| C | 4.842051000  | 0.029311000  | 1.283001000  |
| H | 4.559303000  | 0.974773000  | 0.813301000  |
| H | 5.562859000  | 0.233551000  | 2.082925000  |
| H | 5.335884000  | -0.601267000 | 0.535205000  |

27. [XV]

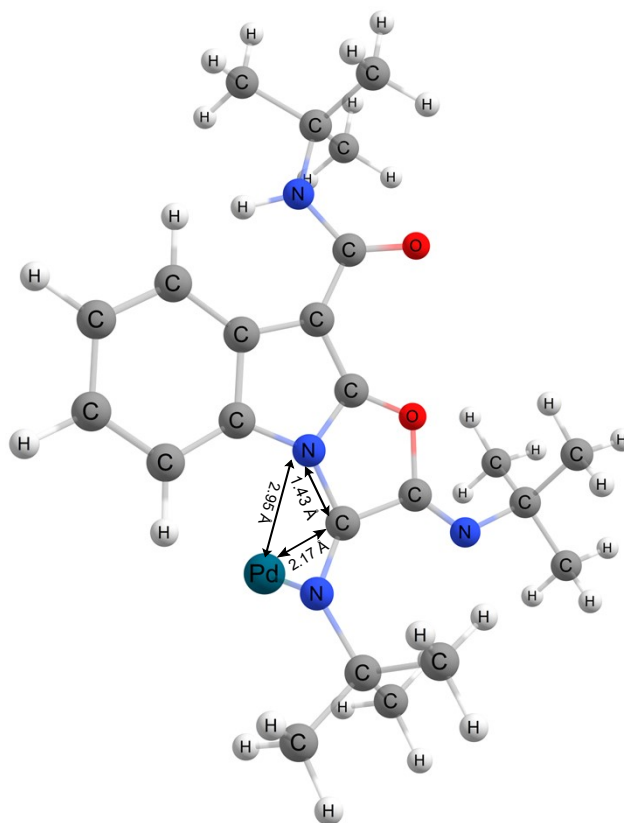

|                                              |                             |
|----------------------------------------------|-----------------------------|
| Zero-point correction=                       | 0.517941 (Hartree/Particle) |
| Thermal correction to Energy=                | 0.550374                    |
| Thermal correction to Enthalpy=              | 0.551318                    |
| Thermal correction to Gibbs Free Energy=     | 0.453554                    |
| Sum of electronic and zero-point Energies=   | -1392.661423                |
| Sum of electronic and thermal Energies=      | -1392.628990                |
| Sum of electronic and thermal Enthalpies=    | -1392.628046                |
| Sum of electronic and thermal Free Energies= | -1392.725809                |

28. [XVI]



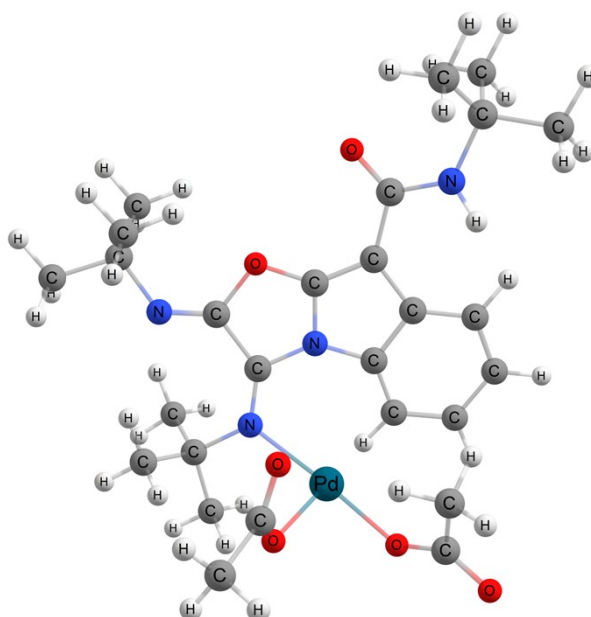

|                                              |                             |
|----------------------------------------------|-----------------------------|
| Zero-point correction=                       | 0.622010 (Hartree/Particle) |
| Thermal correction to Energy=                | 0.664952                    |
| Thermal correction to Enthalpy=              | 0.665896                    |
| Thermal correction to Gibbs Free Energy=     | 0.544155                    |
| Sum of electronic and zero-point Energies=   | -1849.571250                |
| Sum of electronic and thermal Energies=      | -1849.528309                |
| Sum of electronic and thermal Enthalpies=    | -1849.527365                |
| Sum of electronic and thermal Free Energies= | -1849.649105                |

|    |              |              |              |
|----|--------------|--------------|--------------|
| C  | 1.840702000  | -1.364749000 | -1.016395000 |
| C  | 0.474395000  | -1.027645000 | -1.207744000 |
| C  | -0.478069000 | -1.897179000 | -1.731412000 |
| C  | -0.059396000 | -3.202284000 | -2.032133000 |
| C  | 1.279707000  | -3.568310000 | -1.848368000 |
| C  | 2.234959000  | -2.664336000 | -1.362729000 |
| C  | 2.545536000  | -0.165560000 | -0.531367000 |
| C  | 1.574281000  | 0.795490000  | -0.465177000 |
| H  | -1.455885000 | -1.546350000 | -2.125260000 |
| H  | -0.773210000 | -3.916009000 | -2.428595000 |
| H  | 1.590772000  | -4.576148000 | -2.105383000 |
| H  | 3.270600000  | -2.976310000 | -1.276264000 |
| O  | 1.467675000  | 2.101701000  | -0.150875000 |
| N  | 0.337125000  | 0.298542000  | -0.813244000 |
| Pd | -2.327260000 | -1.183972000 | -0.341346000 |
| C  | 3.977742000  | 0.060858000  | -0.197712000 |
| N  | 4.643246000  | -1.036892000 | 0.261576000  |
| C  | 6.060873000  | -1.079429000 | 0.708813000  |
| C  | 6.988420000  | -0.679276000 | -0.451839000 |
| H  | 6.808855000  | 0.351565000  | -0.763855000 |
| H  | 8.033864000  | -0.769077000 | -0.137026000 |
| H  | 6.834448000  | -1.336592000 | -1.314858000 |
| C  | 6.333857000  | -2.536912000 | 1.112441000  |

|   |              |              |              |
|---|--------------|--------------|--------------|
| H | 7.365586000  | -2.642967000 | 1.460507000  |
| H | 5.673638000  | -2.855394000 | 1.928739000  |
| H | 6.192829000  | -3.217561000 | 0.264697000  |
| C | 6.267706000  | -0.151764000 | 1.920679000  |
| H | 5.608351000  | -0.440487000 | 2.747072000  |
| H | 7.303167000  | -0.218664000 | 2.272767000  |
| H | 6.059417000  | 0.887784000  | 1.657293000  |
| O | 4.490374000  | 1.175716000  | -0.341089000 |
| H | 4.074036000  | -1.831059000 | 0.525360000  |
| C | 0.109446000  | 2.492707000  | -0.314589000 |
| N | -0.327147000 | 3.646213000  | -0.117960000 |
| C | 0.467094000  | 4.822664000  | 0.315724000  |
| C | 1.082824000  | 4.558533000  | 1.704600000  |
| H | 1.559500000  | 5.475079000  | 2.067712000  |
| H | 0.308628000  | 4.271571000  | 2.423995000  |
| H | 1.840529000  | 3.772203000  | 1.673582000  |
| C | -0.523759000 | 5.995240000  | 0.402112000  |
| H | -0.006588000 | 6.908710000  | 0.712996000  |
| H | -0.994090000 | 6.180919000  | -0.569299000 |
| H | -1.314933000 | 5.785250000  | 1.129325000  |
| C | 1.559311000  | 5.139757000  | -0.725637000 |
| H | 2.315684000  | 4.353435000  | -0.780275000 |
| H | 1.119442000  | 5.275375000  | -1.719763000 |
| H | 2.060330000  | 6.073515000  | -0.449753000 |
| C | -0.668917000 | 1.230842000  | -0.683944000 |
| N | -1.914916000 | 0.901683000  | -0.769964000 |
| C | -3.062951000 | 1.861803000  | -1.009457000 |
| C | -4.269517000 | 1.022909000  | -1.467505000 |
| H | -4.615670000 | 0.343579000  | -0.686595000 |
| H | -5.093539000 | 1.699852000  | -1.715575000 |
| H | -4.033564000 | 0.444276000  | -2.367303000 |
| C | -2.697786000 | 2.824927000  | -2.156260000 |
| H | -3.576967000 | 3.429117000  | -2.401732000 |
| H | -1.891196000 | 3.506715000  | -1.887115000 |
| H | -2.416040000 | 2.267009000  | -3.056290000 |
| C | -3.427712000 | 2.625237000  | 0.275710000  |
| H | -2.592802000 | 3.223221000  | 0.641863000  |
| H | -4.261124000 | 3.301697000  | 0.056245000  |
| H | -3.750386000 | 1.935616000  | 1.057383000  |
| O | -3.564701000 | -0.682171000 | 1.196582000  |
| O | -2.865192000 | -3.087406000 | -0.110008000 |
| C | -2.991805000 | -0.336342000 | 2.322999000  |
| C | -2.352359000 | -3.994951000 | 0.699313000  |
| O | -1.775655000 | -0.223310000 | 2.502116000  |
| O | -2.755763000 | -5.156611000 | 0.642135000  |
| C | -3.988609000 | -0.110832000 | 3.450413000  |
| H | -4.973656000 | 0.177162000  | 3.076944000  |
| H | -4.097572000 | -1.051324000 | 4.003417000  |
| H | -3.603066000 | 0.645949000  | 4.137762000  |
| C | -1.243925000 | -3.591366000 | 1.652930000  |

|   |              |              |             |
|---|--------------|--------------|-------------|
| H | -1.201564000 | -4.304887000 | 2.479022000 |
| H | -0.287664000 | -3.638135000 | 1.117395000 |
| H | -1.360580000 | -2.576259000 | 2.038274000 |

29. [3a]

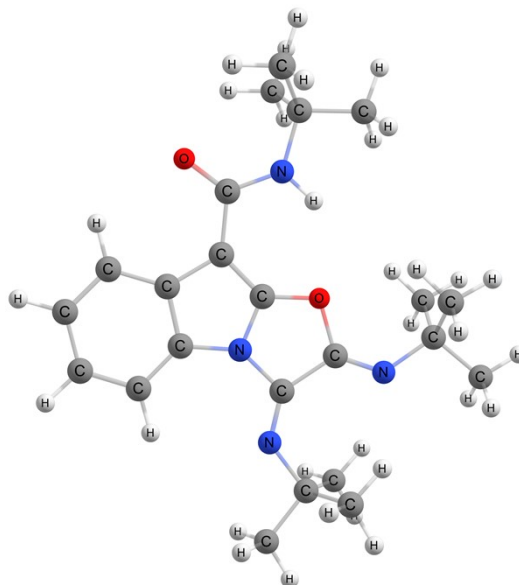

|                                              |                             |
|----------------------------------------------|-----------------------------|
| Zero-point correction=                       | 0.517784 (Hartree/Particle) |
| Thermal correction to Energy=                | 0.548295                    |
| Thermal correction to Enthalpy=              | 0.549239                    |
| Thermal correction to Gibbs Free Energy=     | 0.456675                    |
| Sum of electronic and zero-point Energies=   | -1264.774898                |
| Sum of electronic and thermal Energies=      | -1264.744386                |
| Sum of electronic and thermal Enthalpies=    | -1264.743442                |
| Sum of electronic and thermal Free Energies= | -1264.836006                |

|   |              |              |              |
|---|--------------|--------------|--------------|
| C | 1.097192000  | 2.580359000  | 0.000173000  |
| C | -0.326006000 | 2.580005000  | 0.000391000  |
| C | -1.091777000 | 3.742010000  | 0.000461000  |
| C | -0.397416000 | 4.954921000  | 0.000265000  |
| C | 1.007150000  | 4.985904000  | 0.000053000  |
| C | 1.764730000  | 3.811993000  | 0.000020000  |
| C | 1.565411000  | 1.190278000  | 0.000161000  |
| C | 0.407756000  | 0.456586000  | 0.000444000  |
| H | -2.174012000 | 3.696834000  | 0.000644000  |
| H | -0.955819000 | 5.886384000  | 0.000283000  |
| H | 1.517330000  | 5.944998000  | -0.000088000 |
| H | 2.847539000  | 3.837888000  | -0.000143000 |
| O | 0.082001000  | -0.863860000 | 0.000327000  |
| N | -0.716208000 | 1.235450000  | 0.000659000  |
| C | 2.975315000  | 0.740760000  | -0.000131000 |
| N | 3.176288000  | -0.611320000 | -0.000170000 |
| C | 4.489449000  | -1.303367000 | -0.000262000 |

|   |              |              |              |
|---|--------------|--------------|--------------|
| C | 5.284634000  | -0.939113000 | -1.267381000 |
| H | 5.502427000  | 0.130447000  | -1.297648000 |
| H | 6.233128000  | -1.487626000 | -1.285476000 |
| H | 4.719277000  | -1.204649000 | -2.167705000 |
| C | 4.176734000  | -2.807995000 | -0.000053000 |
| H | 5.106509000  | -3.384579000 | -0.000195000 |
| H | 3.604987000  | -3.095441000 | 0.890455000  |
| H | 3.604629000  | -3.095611000 | -0.890278000 |
| C | 5.284981000  | -0.938854000 | 1.266562000  |
| H | 4.719776000  | -1.204011000 | 2.167098000  |
| H | 6.233365000  | -1.487556000 | 1.284606000  |
| H | 5.502985000  | 0.130674000  | 1.296505000  |
| O | 3.901574000  | 1.562240000  | -0.000344000 |
| H | 2.359421000  | -1.206629000 | 0.000102000  |
| C | -1.341365000 | -0.959125000 | 0.000267000  |
| N | -1.986257000 | -2.030654000 | 0.000217000  |
| C | -1.420211000 | -3.400452000 | 0.000264000  |
| C | -0.580796000 | -3.631996000 | -1.271674000 |
| H | -0.262524000 | -4.678930000 | -1.315630000 |
| H | -1.172662000 | -3.421309000 | -2.168668000 |
| H | 0.313096000  | -3.004084000 | -1.292689000 |
| C | -2.623178000 | -4.358931000 | 0.000157000  |
| H | -2.284347000 | -5.400115000 | 0.000151000  |
| H | -3.246590000 | -4.200601000 | 0.886141000  |
| H | -3.246473000 | -4.200565000 | -0.885904000 |
| C | -0.581075000 | -3.631923000 | 1.272404000  |
| H | 0.312884000  | -3.004108000 | 1.293521000  |
| H | -1.173101000 | -3.421057000 | 2.169250000  |
| H | -0.262928000 | -4.678887000 | 1.316554000  |
| C | -1.891612000 | 0.469375000  | 0.000220000  |
| N | -3.034926000 | 1.012747000  | 0.000008000  |
| C | -4.377725000 | 0.400350000  | -0.000472000 |
| C | -5.360972000 | 1.586860000  | -0.000949000 |
| H | -5.209816000 | 2.212821000  | -0.886903000 |
| H | -6.397160000 | 1.231867000  | -0.001271000 |
| H | -5.210427000 | 2.213035000  | 0.884956000  |
| C | -4.604782000 | -0.437582000 | 1.272931000  |
| H | -5.646605000 | -0.774914000 | 1.310175000  |
| H | -3.959043000 | -1.317121000 | 1.294915000  |
| H | -4.414569000 | 0.166105000  | 2.167229000  |
| C | -4.603940000 | -0.437875000 | -1.273822000 |
| H | -3.958278000 | -1.317478000 | -1.295165000 |
| H | -5.645774000 | -0.775103000 | -1.311713000 |
| H | -4.413061000 | 0.165582000  | -2.168137000 |

### 30. [H<sub>2</sub>O]

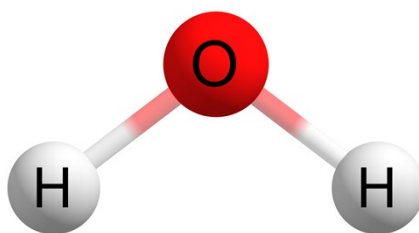

|                                              |                             |
|----------------------------------------------|-----------------------------|
| Zero-point correction=                       | 0.021166 (Hartree/Particle) |
| Thermal correction to Energy=                | 0.024002                    |
| Thermal correction to Enthalpy=              | 0.024946                    |
| Thermal correction to Gibbs Free Energy=     | 0.003512                    |
| Sum of electronic and zero-point Energies=   | -76.417578                  |
| Sum of electronic and thermal Energies=      | -76.414742                  |
| Sum of electronic and thermal Enthalpies=    | -76.413798                  |
| Sum of electronic and thermal Free Energies= | -76.435232                  |

|   |             |              |              |
|---|-------------|--------------|--------------|
| O | 0.000000000 | 0.000000000  | 0.117148000  |
| H | 0.000000000 | 0.768628000  | -0.468593000 |
| H | 0.000000000 | -0.768628000 | -0.468593000 |

### 31. [N<sub>2</sub>]

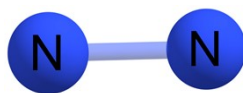

|                                              |                             |
|----------------------------------------------|-----------------------------|
| Zero-point correction=                       | 0.005598 (Hartree/Particle) |
| Thermal correction to Energy=                | 0.007958                    |
| Thermal correction to Enthalpy=              | 0.008902                    |
| Thermal correction to Gibbs Free Energy=     | -0.012851                   |
| Sum of electronic and zero-point Energies=   | -109.518274                 |
| Sum of electronic and thermal Energies=      | -109.515913                 |
| Sum of electronic and thermal Enthalpies=    | -109.514969                 |
| Sum of electronic and thermal Free Energies= | -109.536722                 |

|   |             |             |              |
|---|-------------|-------------|--------------|
| N | 0.000000000 | 0.000000000 | 0.552392000  |
| N | 0.000000000 | 0.000000000 | -0.552392000 |

### 32. [CH<sub>3</sub>COOH]

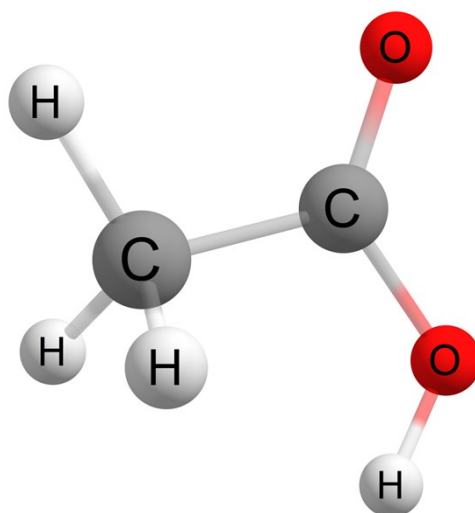

|                                              |                             |
|----------------------------------------------|-----------------------------|
| Zero-point correction=                       | 0.061548 (Hartree/Particle) |
| Thermal correction to Energy=                | 0.066053                    |
| Thermal correction to Enthalpy=              | 0.066997                    |
| Thermal correction to Gibbs Free Energy=     | 0.034786                    |
| Sum of electronic and zero-point Energies=   | -229.043131                 |
| Sum of electronic and thermal Energies=      | -229.038625                 |
| Sum of electronic and thermal Enthalpies=    | -229.037681                 |
| Sum of electronic and thermal Free Energies= | -229.069892                 |

|   |              |              |              |
|---|--------------|--------------|--------------|
| C | 1.374843000  | 0.040662000  | -0.000077000 |
| H | 1.857066000  | -0.936849000 | -0.000221000 |
| H | 1.695616000  | 0.599438000  | -0.886895000 |
| H | 1.695681000  | 0.599207000  | 0.886864000  |
| C | -0.126413000 | -0.135111000 | -0.000032000 |
| O | -0.857174000 | 1.013820000  | 0.000217000  |
| O | -0.700313000 | -1.199785000 | -0.000141000 |
| H | -0.279046000 | 1.792621000  | 0.000295000  |

### 33. [CH<sub>3</sub>COO<sup>-</sup>]

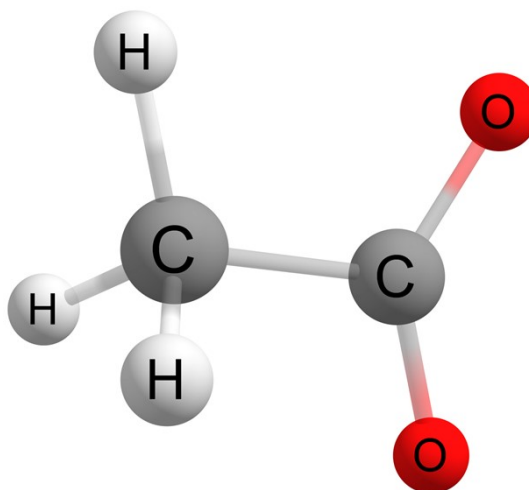

|                                              |                             |
|----------------------------------------------|-----------------------------|
| Zero-point correction=                       | 0.048340 (Hartree/Particle) |
| Thermal correction to Energy=                | 0.052713                    |
| Thermal correction to Enthalpy=              | 0.053657                    |
| Thermal correction to Gibbs Free Energy=     | 0.021131                    |
| Sum of electronic and zero-point Energies=   | -228.548194                 |
| Sum of electronic and thermal Energies=      | -228.543821                 |
| Sum of electronic and thermal Enthalpies=    | -228.542877                 |
| Sum of electronic and thermal Free Energies= | -228.575404                 |

|   |              |              |              |
|---|--------------|--------------|--------------|
| C | 1.350740000  | -0.049290000 | -0.000026000 |
| H | 1.729110000  | -1.076350000 | -0.000659000 |
| H | 1.739639000  | 0.476086000  | -0.881632000 |
| H | 1.740039000  | 0.475147000  | 0.881978000  |
| C | -0.200598000 | 0.000662000  | 0.000226000  |
| O | -0.705993000 | 1.158980000  | -0.000057000 |
| O | -0.807712000 | -1.106869000 | -0.000054000 |

## References:

- 1 S. Muthusamy, C. Gunanathan and M. Nethaji, *Journal of Organic Chemistry*, 2004, **69**, 5631–5637.
- 2 G. K. Murphy, F. Z. Abbas and A.V. Poulton, *Adv Synth Catal*, 2014, **356**, 2919–2923.
- 3 Jeankumar, V. U.; Alokam, R.; Sridevi, J. P.; Suryadevara, P.; Matikonda, S. S.; Peddi, S.; Sahithi, S.; Alvala, M.; Yogeewari, P.; Sriram, D. *Chem Biol Drug Des*, 2014, **83**, 498–506.
- 4 B, Spingler, S. Schnidrig, T. Todorova and F. Wild, *CrystEngComm*, 2012, **14**, 751–757.
- 5 X. Chen, W. Zhu, W. Qian, E. Feng, Y. Zhou, J. Wang, H. Jiang, Z.-J. Yao and H. Liu, *Advanced Synthesis & Catalysis*, 2012, **354**, 2151-2156.
- 6 F. Bfuude and H. G. Lindwall, *Journal of the American Chemical Society*, 1933, **55**, 325-327.
- 7 (a) A. D. Becke, *J. Chem. Phys*, 1993, **98**, 5648. (b) C. Lee, W. Yang and R.G. Parr, *Phys. Rev. B*, 1988, **37**, 785.
- 8 (a) P. C. Harihara and J. A. Pople, *Theoret. Chimica Acta.*, 1973, **28**, 213; (b) M. -M. Francl, W. J. Pietro, W. J. Hehre, J. S. Binkley, M. S. Gordon, D. J. DeFrees and J. A. Pople, *J. Chem. Phys.*, 1982, **77**, 3654.
- 9 D. Andrae, U. Haussermann, M. Dolg, H. Stoll, and H. Preuss, *Theor. Chim. Acta.* 1990, **77**, 123.
- 10 A.V. Marenich, C. J. Cramer and D. G. Truhlar, *J. Phys. Chem. B*. 2009, **113**, 6378.
- 11 G. A. Andrienko, ChemCraft, <http://www.chemcraftprog.com>.
- 12 M. J. Frisch, G. W. Trucks, H. B. Schlegel, G. E. Scuseria, M. A. Robb, J. R. Cheeseman, G. Scalmani, V. Barone, G. A. Petersson, H. Nakatsuji, X. Li, M. Caricato, A. V. Marenich, J. Bloino, B. G. Janesko, R. Gomperts, B. Mennucci, H. P. Hratchian, J. V. Ortiz, A. F. Izmaylov, J. L. Sonnenberg, D. Williams-Young, F. Ding, F. Lipparini, F. Egidi, J. Goings, B. Peng, A. Petrone, T. Henderson, D. Ranasinghe, V. G. Zakrzewski, J. Gao, N. Rega, G. Zheng, W. Liang, M. Hada, M. Ehara, K. Toyota, R. Fukuda, J. Hasegawa, M. Ishida, T. Nakajima, Y. Honda, O. Kitao, H. Nakai, T. Vreven, K. Throssell, J. A. Montgomery, Jr., J. E. Peralta, F. Ogliaro, M. J. Bearpark, J. J. Heyd, E. N. Brothers, K. N. Kudin, V. N. Staroverov, T. A. Keith, R. Kobayashi, J. Normand, K. Raghavachari, A. P. Rendell, J. C. Burant, S. S. Iyengar, J. Tomasi, M. Cossi, J. M. Millam, M. Klene, C. Adamo, R. Cammi, J. W. Ochterski, R. L. Martin, K. Morokuma, O. Farkas, J. B. Foresman, and D. J. Fox, Gaussian, Inc., Wallingford CT, 2016.
